# Supplementary material for: Synthesis of diarylsulphide-/diarylselenide-embedded pyrazole-fused isocoumarins and isatin/ninhydrin hydrazones via acid-catalyzed solvent- and temperature-controlled reactions
Source: Royal Society of Chemistry journal article supplement (doi:10.1039/d4ob01422g), 2024-11-11
Supplement: d4ob01422g1.pdf [file d4ob01422g1.pdf]

## Supporting Information

### **Synthesis of diarylsulphide/diarylselenide embedded pyrazole-fused isocoumarins and isatin/ninhydrin hydrazones via acid catalyzed solvent and temperature controlled reactions**

Sayanwita Panja,<sup>a,b</sup> Arun Dhurey<sup>a</sup> and Animesh Pramanik<sup>\*a</sup>

<sup>a</sup>Department of Chemistry, University of Calcutta, 92, A. P. C. Road, Kolkata 700009, India.

<sup>b</sup>Department of Chemistry, Shahid Matangini Hazra Govt. General Degree College for Women, East Midnapore 721649, India.

Fax: +91-33-2351-9755; Tel: +91-9830107470.

E-mail: [pramanikanimesh61@gmail.com](mailto:pramanikanimesh61@gmail.com)

---

| <b>CONTENTS</b>                                                                       | <b>PAGE NO.</b> |
|---------------------------------------------------------------------------------------|-----------------|
| General information and experimental procedure for starting material <b>2</b>         | <b>S2</b>       |
| Starting material <b>2</b> utilized in the synthesis of compounds <b>3</b> & <b>4</b> | <b>S3</b>       |
| Optimization of the reaction conditions for compound <b>3</b> and <b>4</b>            | <b>S4</b>       |
| Some additional optimization studies for compound <b>3</b>                            | <b>S5- S6</b>   |
| Library of synthesized hydrazone <b>3</b>                                             | <b>S7</b>       |
| Gram-scale synthesis of compound <b>3h</b> and <b>4n</b>                              | <b>S8</b>       |
| ORTEP diagram and X-ray analysis data of compound <b>3j</b> and <b>4p</b>             | <b>S9-S11</b>   |
| Spectral Data of Compound <b>3</b> and <b>4</b>                                       | <b>S12-S27</b>  |
| <sup>1</sup> H and <sup>13</sup> C NMR spectra of compounds <b>3a-ab</b>              | <b>S28-S57</b>  |
| <sup>1</sup> H and <sup>13</sup> C NMR spectra of compounds <b>4a-v</b>               | <b>S58-S82</b>  |
| LC-MS Mass Spectrum of reaction mixture for intermediate <b>A</b>                     | <b>S83</b>      |

## Experimental section:

**General information:** Solvents and chemicals were sourced from commercial chemical suppliers and used without additional purification. The starting materials, specifically diaryl sulfide/selenide embedded arylhydrazones **2**, were synthesized following a previously reported procedure.<sup>1,2</sup> Melting points were recorded in open capillary tubes and remained uncorrected. Column chromatography was carried out using silica gel (60-120 mesh) and neutral alumina (Merck) with hexane/ethyl acetate solvent system. Additionally, <sup>1</sup>H (300 & 400 MHz), <sup>13</sup>C (75 & 101 MHz) and <sup>19</sup>F (377 MHz) spectra were acquired using Bruker instrument in CDCl<sub>3</sub> and DMSO-d<sub>6</sub> NMR solvents. High-resolution mass spectra (HRMS) were obtained using the Xevo G2-S QToF instrument. Lastly, X-ray diffraction data for the crystallized compound were collected at 296 K using MoK<sub>α</sub> radiation and the Bruker APEX-II CCD System.

### Experimental procedure for the synthesis of starting material sulphenylated/selenylated arylhydrazones **2**<sup>1,2</sup>

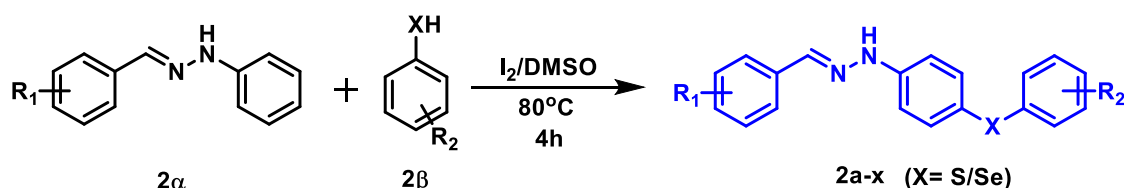

Initially, arylhydrazone **2α** was synthesized following a previously reported procedure using differently substituted benzaldehydes and phenylhydrazines in ethanol solvent.<sup>1</sup> Subsequently, a mixture of compounds **2α** (1.0 mmol, 1.0 equiv) and diversely substituted arylthiols/arylselenols **2β** (1.5 mmol, 1.5 equiv) was dissolved in 2.0 ml dimethyl sulfoxide (DMSO) in a 25 ml round-bottom flask. To this pot iodine (10 mol %, 0.1 equiv) was added and then the entire reaction mixture was heated at 80°C for 4 h under N<sub>2</sub> atmosphere in an oil bath (monitored by TLC). After completion of the reaction, the crude mixture was quenched with 10 ml of saturated sodium thiosulfate solution and extracted twice with ethyl acetate. The collected organic layer was then dried over anhydrous Na<sub>2</sub>SO<sub>4</sub>. Evaporation under reduced pressure yielded a crude mass, which was subsequently purified by column chromatography using silica gel (hexane/ethyl acetate as solvent system) to obtain starting materials **2a-x** in 60-86% yield (Table S1).<sup>2</sup>

**Table S1:** Starting materials diarylsulfide and diarylselenide containing arylhydrazones **2** utilized in the synthesis of compounds **3** & **4**.<sup>2</sup>

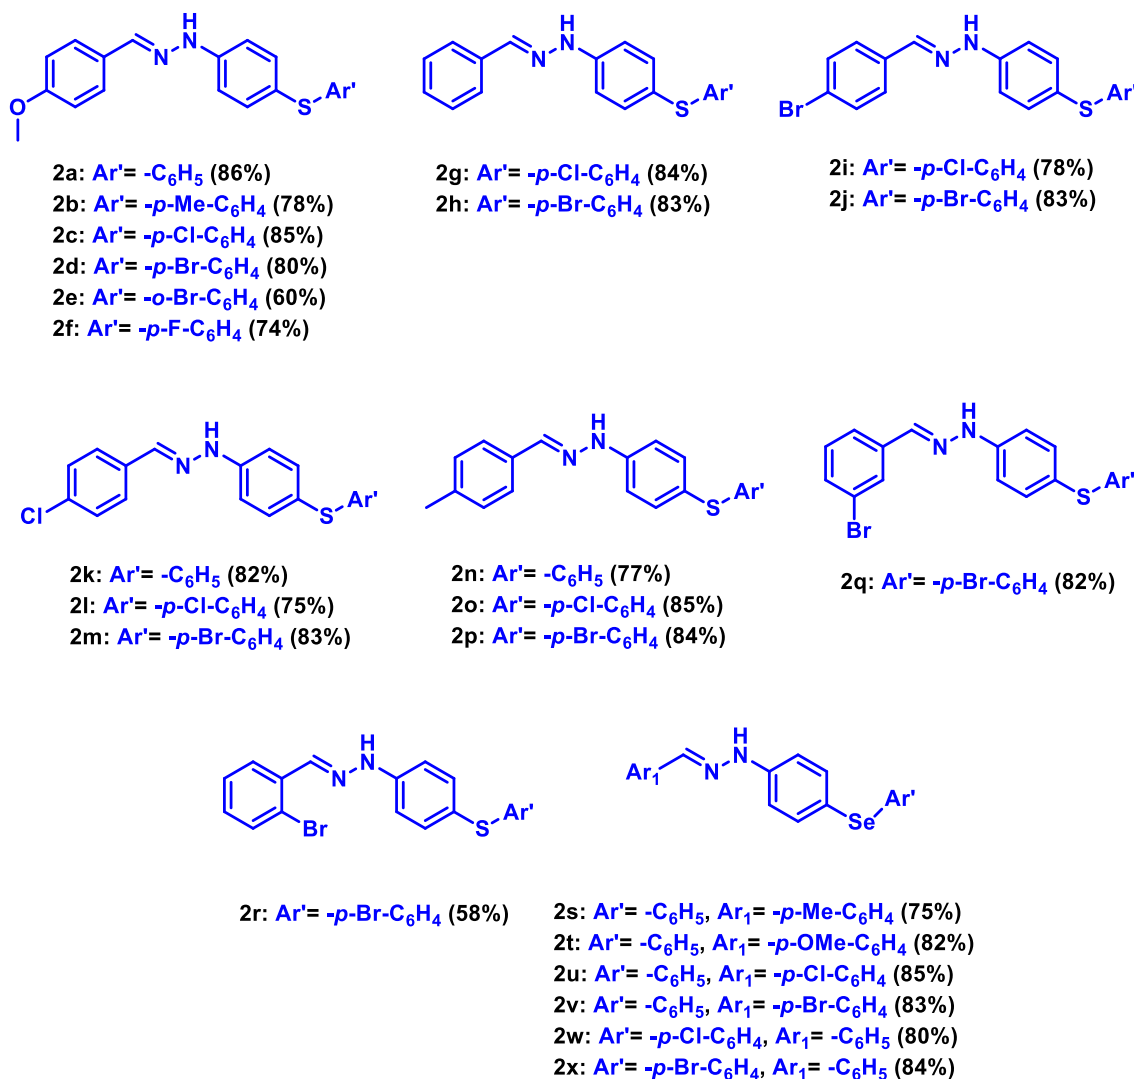

## References:

- 1 Z. T. G. Maz, S. Turanli, H. B. Caliskan, *J. Fac. Pharm. Ankara.*, 2023, **47**, 111-119.
- 2 A. Dhurey, S. Mandal, A. Pramanik, *J. Org. Chem.*, 2023, **88**, 5377-5390.

**Table S2.** Optimization of the reaction conditions for compound **3** and **4** (full studies).<sup>a,b</sup>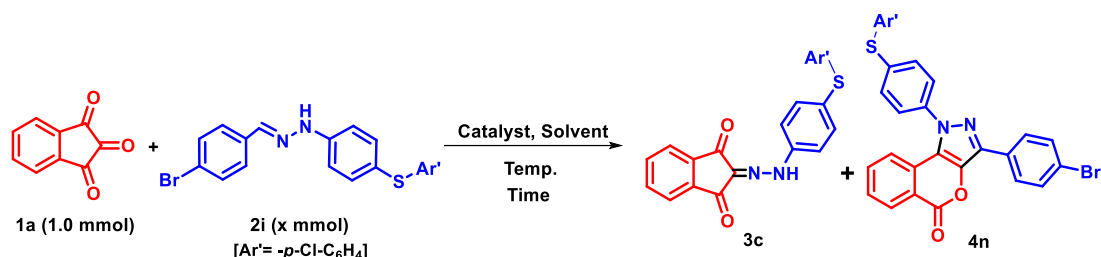

| Entry     | <b>2i</b><br>(x mmol) | Catalyst<br>(y mol%)                     | Solvent<br>(2.0 mL) | Temp<br>(°C) | Time<br>(hr) | Yield <sup>b</sup> (%)<br>of <b>3c</b> | Yield <sup>b</sup> (%)<br>of <b>4n</b> |
|-----------|-----------------------|------------------------------------------|---------------------|--------------|--------------|----------------------------------------|----------------------------------------|
| 1         | 1.0                   | <i>p</i> -TSA (5.0)                      | EtOH                | r.t.         | 1.0          | -                                      | <10                                    |
| 2         | 1.0                   | HCl (5.0)                                | EtOH                | r.t.         | 1.0          | -                                      | 12                                     |
| 3         | 1.0                   | HCl (5.0)                                | EtOH                | 78           | 1.0          | 15                                     | -                                      |
| 4         | 1.0                   | Cu(OAc) <sub>2</sub> (5.0)               | EtOH                | 78           | 1.0          | 28                                     | -                                      |
| 5         | 1.0                   | FeCl <sub>3</sub> (5.0)                  | EtOH                | 78           | 1.0          | trace                                  | -                                      |
| 6         | 1.0                   | CSA (5.0)                                | EtOH                | 78           | 1.0          | 45                                     | -                                      |
| 7         | 1.0                   | AcOH (5.0)                               | EtOH                | 78           | 1.0          | 30                                     | -                                      |
| 8         | 1.0                   | <i>p</i> -TSA (5.0)                      | EtOH                | 78           | 1.0          | 62                                     | -                                      |
| 9         | 1.2                   | <i>p</i> -TSA (5.0)                      | EtOH                | 78           | 1.0          | 67                                     | -                                      |
| 10        | 1.2                   | <i>p</i> -TSA (10.0)                     | EtOH                | 78           | 1.0          | 70                                     | -                                      |
| 11        | 1.5                   | <i>p</i> -TSA (20.0)                     | EtOH                | 78           | 1.0          | 74                                     | -                                      |
| 12        | 1.5                   | <i>p</i> -TSA (20.0)                     | EtOH                | 78           | 2.0          | 82                                     | -                                      |
| <b>13</b> | <b>1.5</b>            | <b><i>p</i>-TSA (20.0)</b>               | <b>EtOH</b>         | <b>78</b>    | <b>3.0</b>   | <b>85</b>                              | -                                      |
| 14        | 1.5                   | <i>p</i> -TSA (20.0)                     | EtOH                | 78           | 4.0          | 81                                     | -                                      |
| 15        | 1.5                   | <i>p</i> -TSA (30.0)                     | EtOH                | 78           | 4.0          | 79                                     | -                                      |
| 16        | 2.0                   | <i>p</i> -TSA (40.0)                     | EtOH                | 78           | 5.0          | 65                                     | -                                      |
| 17        | 1.5                   | -                                        | EtOH                | 78           | 2.0          | -                                      | -                                      |
| 18        | 1.5                   | HCl (0.1)                                | DCM                 | r.t.         | 1.0          | -                                      | 76                                     |
| <b>19</b> | <b>1.5</b>            | <b>H<sub>2</sub>SO<sub>4</sub> (0.1)</b> | <b>DCM</b>          | <b>r.t.</b>  | <b>1.0</b>   | -                                      | <b>89</b>                              |
| 20        | 1.5                   | H <sub>2</sub> SO <sub>4</sub> (0.1)     | CH <sub>3</sub> CN  | r.t.         | 1.0          | -                                      | 74                                     |
| 21        | 1.5                   | H <sub>2</sub> SO <sub>4</sub> (0.1)     | CHCl <sub>3</sub>   | r.t.         | 1.0          | -                                      | 63                                     |
| 22        | 1.5                   | H <sub>2</sub> SO <sub>4</sub> (0.1)     | Acetone             | r.t.         | 1.0          | -                                      | 60                                     |

<sup>a</sup>Reaction conditions: **1a** (1.0 mmol) and **2i** (x mol%) were dissolved in solvent (2.0 mL) and then catalyst (y mol%) was added to the same pot. The entire reaction mixture was stirred for 1-5 h at r.t.-78°C in open-air. <sup>b</sup>Isolated yields. Bold row 13 & 19 indicate the optimal conditions for **3c** and **4n** respectively.



### Optimization studies for the formation of isatin hydrazones **3**.

To achieve the maximum yield of isatin derived sulphenylated hydrazone **3h**, 5-nitroisatin **1b'** and (*E*)-1-(4-((4-chloromophenyl)thio)phenyl)-2-(4-methoxybenzylidene)hydrazine **2c** were taken as model substrates in the optimization study. The starting material **1b'** (1.0 mmol) and hydrazone **2c** (x mmol) were dissolved in 2.0 mL solvent and then the entire reaction mixture was stirred with different acid catalysts (y mol %) in open air for different time and temperatures (Table S3). Initially, the use of strong mineral acids such as conc. HCl & H<sub>2</sub>SO<sub>4</sub> (5 mol % each) as catalyst in EtOH (2.0 mL) at r.t. and 78°C for 1.0 h stirring resulted very low yield of the product **3h** due to charring of the reaction mixture (Table S3, entries 1-3). Thus we employed other Lewis/organic acids such as Cu(OAc)<sub>2</sub>, FeCl<sub>3</sub>, CSA, AcOH and *p*-TsOH (5 mol % each) successively for 1.0 h reflux (78°C) to further maximize the yield of **3h** (entries 4-8). From the above screening experiments it was observed that *p*-TsOH was the most efficient catalyst to deliver **3h** in ~68% yields (entry 8). Then to improve the yield of **3h** further, the amount of hydrazone **2c** was increased from 1.0 to 1.5 mmol. The results showed minimal improvement in the yield of **3h** if the other reaction parameters were kept constant (Table S3, entries 9 & 10). Subsequently, upon increasing the mol % of *p*-TsOH and reaction time simultaneously (Table S3, entries 11-13), the best possible outcome of **3h** with ~92% yield was isolated when the reaction mixture was refluxed for 3.0 h in presence of 20 mol% *p*-TsOH (entry 13). The extended period of heating and use of excess amount of *p*-TsOH showed sudden decline in the yield of **3h** from 92% to 71%, presumably due to thermal decomposition of hydrazone **2c** (entries 14-17). Expectedly, the reaction failed to generate **3h** in the absence of catalyst, thus implying the role of *p*-TsOH for this reaction to occur (entry 18). Several aprotic solvents such as acetone, DCM, CH<sub>3</sub>CN, DMF and DMSO were also examined but none of these solvents were effective enough for the production of **3h** in satisfactory yield (Table S3, entries 19-23). Therefore, refluxing the mixture of 5-nitroisatin **1b'** (1.0 mmole) and arylhydrazone **2c** (1.5 mmol) in EtOH (2.0 mL) in open air

for 3.0 h at 78°C in presence of *p*-TsOH (20 mol %) afforded the desired product **3h** in ~92% yield (Table S3, entry 13).

**Table S3** Optimization of the reaction conditions for formation of isatin hydrazones.<sup>a,b</sup>

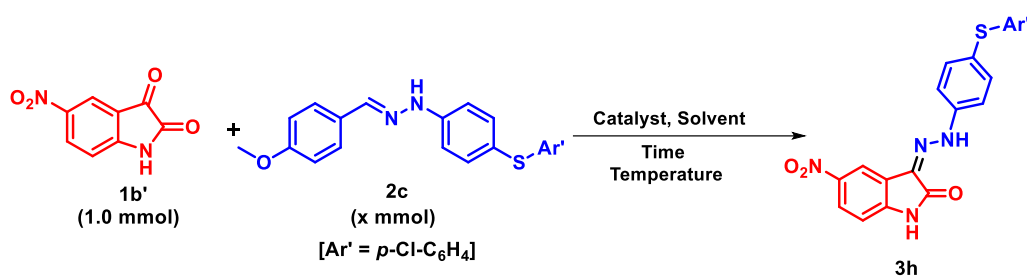

| Entry     | <b>2c</b><br>(x mmol) | Catalyst<br>(y mol %)                | Solvent<br>(2.0 mL) | Time<br>(h) | Temp.<br>(°C) | Yield <sup>b</sup> (%) of<br><b>3h</b> |
|-----------|-----------------------|--------------------------------------|---------------------|-------------|---------------|----------------------------------------|
| 1         | 1.0                   | HCl (5.0)                            | EtOH                | 1.0         | r.t.          | -                                      |
| 2         | 1.0                   | HCl (5.0)                            | EtOH                | 1.0         | 78            | <20                                    |
| 3         | 1.0                   | H <sub>2</sub> SO <sub>4</sub> (5.0) | EtOH                | 1.0         | 78            | 22                                     |
| 4         | 1.0                   | Cu(OAc) <sub>2</sub> (5.0)           | EtOH                | 1.0         | 78            | 31                                     |
| 5         | 1.0                   | FeCl <sub>3</sub> (5.0)              | EtOH                | 1.0         | 78            | trace                                  |
| 6         | 1.0                   | CSA (5.0)                            | EtOH                | 1.0         | 78            | 43                                     |
| 7         | 1.0                   | AcOH (5.0)                           | EtOH                | 1.0         | 78            | 32                                     |
| 8         | 1.0                   | <i>p</i> -TsOH (5.0)                 | EtOH                | 1.0         | 78            | 68                                     |
| 9         | 1.2                   | <i>p</i> -TsOH (5.0)                 | EtOH                | 1.0         | 78            | 72                                     |
| 10        | 1.5                   | <i>p</i> -TsOH (5.0)                 | EtOH                | 1.0         | 78            | 74                                     |
| 11        | 1.5                   | <i>p</i> -TsOH (10.0)                | EtOH                | 1.5         | 78            | 80                                     |
| 12        | 1.5                   | <i>p</i> -TsOH (15.0)                | EtOH                | 2.0         | 78            | 83                                     |
| <b>13</b> | <b>1.5</b>            | <b><i>p</i>-TsOH (20.0)</b>          | <b>EtOH</b>         | <b>3.0</b>  | <b>78</b>     | <b>92</b>                              |
| 14        | 1.5                   | <i>p</i> -TsOH (20.0)                | EtOH                | 4.0         | 78            | 90                                     |
| 15        | 1.5                   | <i>p</i> -TsOH (20.0)                | EtOH                | 5.0         | 78            | 87                                     |
| 16        | 1.5                   | <i>p</i> -TsOH (30.0)                | EtOH                | 3.0         | 78            | 78                                     |
| 17        | 1.5                   | <i>p</i> -TsOH (40.0)                | EtOH                | 3.0         | 78            | 71                                     |
| 18        | 1.5                   | -                                    | EtOH                | 3.0         | 78            | -                                      |
| 19        | 1.5                   | <i>p</i> -TsOH (20.0)                | Acetone             | 3.0         | 78            | 44                                     |
| 20        | 1.5                   | <i>p</i> -TsOH (20.0)                | DCM                 | 3.0         | 78            | 25                                     |
| 21        | 1.5                   | <i>p</i> -TsOH (20.0)                | CH <sub>3</sub> CN  | 3.0         | 78            | 31                                     |
| 22        | 1.5                   | <i>p</i> -TsOH (20.0)                | DMF                 | 3.0         | 78            | -                                      |
| 23        | 1.5                   | <i>p</i> -TsOH (20.0)                | DMSO                | 3.0         | 78            | -                                      |

<sup>a</sup>Reaction conditions: Substrate **1b'** (1.0 mmol) & **2c** (x mmol) were dissolved in solvent (2.0 mL) and then catalyst (y mol %) was added to this pot. Then the entire reaction mixture was stirred at r.t.-78°C for 1.0-5.0 h. <sup>b</sup>Yield of isolated product **3h**. Bold row 13 indicates the optimal conditions for **3h**.

**Table S4** Synthesis of diarylsulphide/diarylselenide substituted ninhydrin/isatin hydrazones**3.**<sup>a</sup>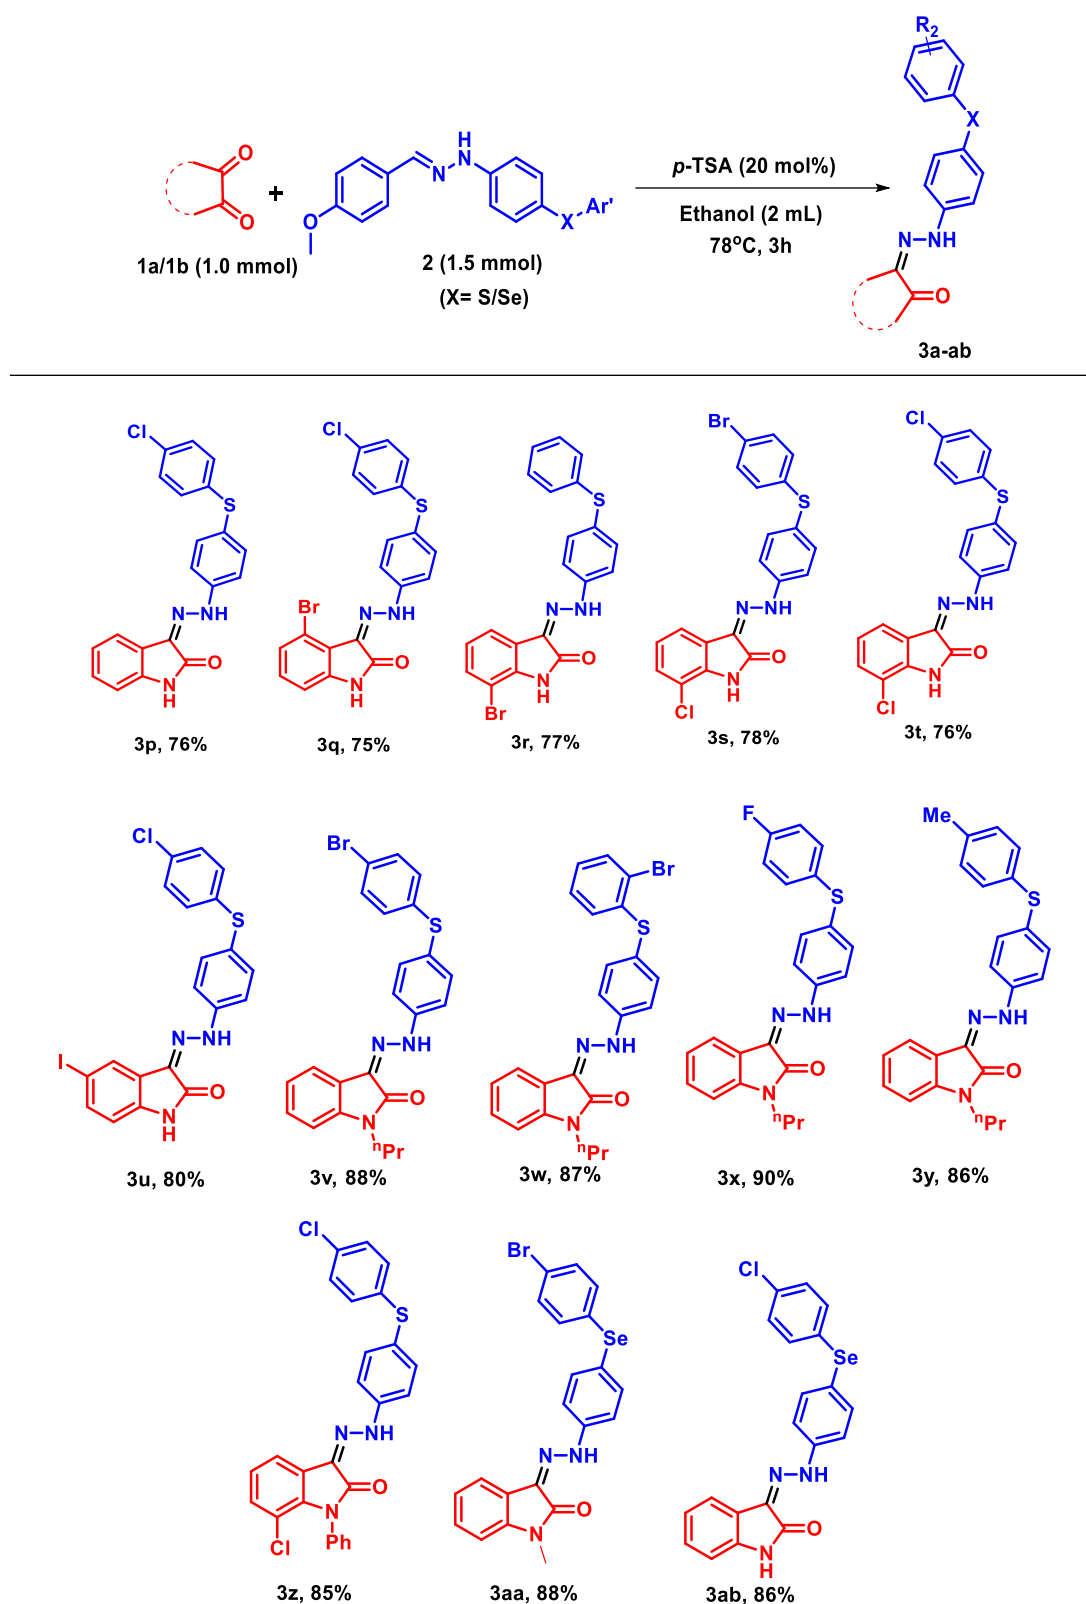

<sup>a</sup>Reaction conditions: ninhydrin **1a**/isatin **1b** (1.0 mmol) and hydrazone **2** (1.5 mmol) were dissolved in ethanol (2.0 mL) and then 20 mol% *p*-TSA was added to the same pot. The entire reaction mixture was refluxed at 78°C for 3 h in open-air.

### Gram-scale synthesis of compound 3h.

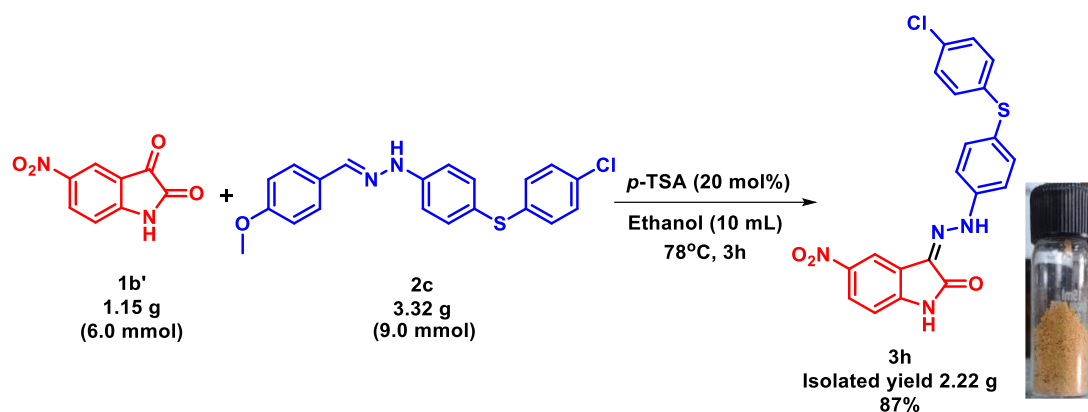

Upon confirming the efficacy of the method through the preparation of a series of ninhydrin/isatin derived hydrazones (**3**) substituted with diarylsulphide/diarylselenide unit, a gram-scale synthesis was undertaken to demonstrate its practical usefulness. The desired product **3h** was obtained in 87% yield (~ 2.22 g) after heating a mixture of 5-nitroisatin **1b'** (~1.15 g, 6.0 mmol) and hydrazone **2c** (~3.32 g, 9.0 mmol) in 10 mL ethanol in presence of *p*-TSA at 78°C for 3 h.

### Gram-scale synthesis of compound 4n.

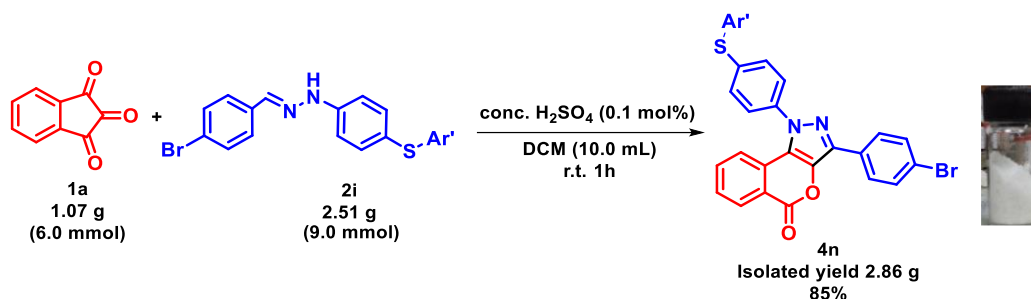

Upon confirming the efficacy of the method through the preparation of a series of pyrazole-fused isocoumarins integrated with diarylsulphide/diarylselenide unit, a gram-scale synthesis was undertaken to demonstrate its practical usefulness. The desired product **4n** was obtained in 85% yield (~ 2.86 g) after stirring a mixture of ninhydrin **1a** (~1.06 g, 6.0 mmol) and hydrazone **2i** (~2.51 g, 9.0 mmol) in presence of conc. H<sub>2</sub>SO<sub>4</sub> (0.1 mol%) in 10 mL DCM at r.t. for 1 h.

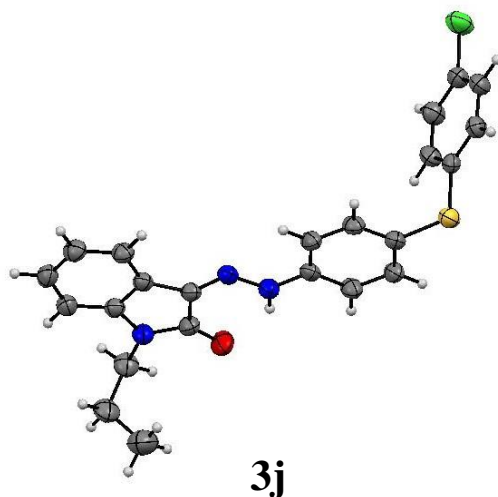

**Figure S1.** ORTEP diagram of X-ray crystal structure of compound **3j** (CCDC No. 2371891). The thermal ellipsoids are shown at 50% probability. Color code: blue, nitrogen; red, oxygen; yellow, sulphur; green, chlorine; grey, carbon; white, hydrogen. The crystal was grown from  $\text{CHCl}_3$  at room temperature through slow evaporation.

**Table S5.** Single crystal X-ray analysis data of compound **3j**

| Compound              | <b>3j</b>                                         |
|-----------------------|---------------------------------------------------|
| Formula               | $\text{C}_{23}\text{H}_{20}\text{ClN}_3\text{OS}$ |
| Formula weight        | 421.93                                            |
| Temperature (K)       | 175.29                                            |
| Crystal colour        | Yellow                                            |
| Crystal system        | Triclinic                                         |
| Space group           | P-1                                               |
| $a(\text{\AA})$       | 5.4212(11)                                        |
| $b(\text{\AA})$       | 12.849(3)                                         |
| $c(\text{\AA})$       | 15.183(3)                                         |
| $\alpha(^{\circ})$    | 82.858(8)                                         |
| $\beta(^{\circ})$     | 81.299(8)                                         |
| $\gamma(^{\circ})$    | 87.732(9)                                         |
| $V(\text{\AA}^3)$     | 1037.1(4)                                         |
| $Z$                   | 2                                                 |
| $D_c/\text{gcm}^{-3}$ | 1.351                                             |
| Radiation type        | $\text{MoK}_{\alpha}$                             |
| Radiation wave length | 0.71073                                           |

|                                                    |                                                            |
|----------------------------------------------------|------------------------------------------------------------|
| $\mu/\text{mm}^{-1}$                               | 0.304                                                      |
| F(000)                                             | 440.0                                                      |
| Crystal size/ $\text{mm}^3$                        | $0.18 \times 0.1 \times 0.03$                              |
| R(int)                                             | 0.0665                                                     |
| R(sigma)                                           | 0.0761                                                     |
| Total reflections                                  | 11618                                                      |
| Independent reflections                            | 4541                                                       |
| 2 $\Theta$ range for data collection/ $^\circ$     | 5.994 to 54.496                                            |
| Index ranges                                       | $-6 \leq h \leq 6, -16 \leq k \leq 16, -19 \leq l \leq 19$ |
| R <sub>1</sub> ,wR <sub>2</sub> (I>2 $\sigma$ (I)) | 0.0597, 0.1629                                             |
| R <sub>1</sub> ,wR <sub>2</sub> (for all data)     | 0.0730, 0.1782                                             |
| Goodness-of-fit on F <sup>2</sup>                  | 1.056                                                      |
| Largest diff. peak/hole / e $\text{\AA}^{-3}$      | 0.41/-0.34                                                 |

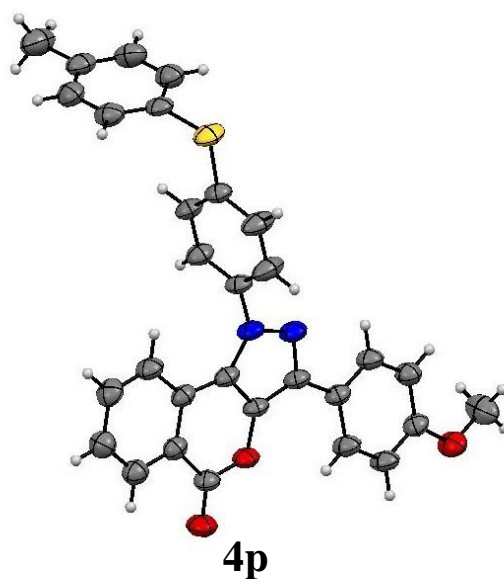

**Figure S2.** ORTEP diagram of X-ray crystal structure of compound **4p** (CCDC No. 2371892). The thermal ellipsoids are shown at 50% probability. Color code: blue, nitrogen; red, oxygen; yellow, sulphur; grey, carbon; white, hydrogen. The crystal was grown from  $\text{CH}_3\text{CN}+\text{CHCl}_3+\text{Hexane}$  at room temperature through slow evaporation.

**Table S6.** Single crystal X-ray analysis data of compound **4p**

| Compound                                           | <b>4p</b>                                                       |
|----------------------------------------------------|-----------------------------------------------------------------|
| Formula                                            | C <sub>30</sub> H <sub>22</sub> N <sub>2</sub> O <sub>3</sub> S |
| Formula weight                                     | 490.55                                                          |
| Temperature (K)                                    | 298.95                                                          |
| Crystal colour                                     | White                                                           |
| Crystal system                                     | Triclinic                                                       |
| Space group                                        | P-1                                                             |
| $a(\text{\AA})$                                    | 7.8820(11)                                                      |
| $b(\text{\AA})$                                    | 10.6903(15)                                                     |
| $c(\text{\AA})$                                    | 15.608(2)                                                       |
| $\alpha(^{\circ})$                                 | 81.608(5)                                                       |
| $\beta(^{\circ})$                                  | 82.326(5)                                                       |
| $\gamma(^{\circ})$                                 | 68.920(5)                                                       |
| $V(\text{\AA}^3)$                                  | 1209.3(3)                                                       |
| $Z$                                                | 2                                                               |
| $D_c/\text{gcm}^{-3}$                              | 1.347                                                           |
| Radiation type                                     | MoK $_{\alpha}$                                                 |
| Radiation wavelength                               | 0.71073                                                         |
| $\mu/\text{mm}^{-1}$                               | 0.170                                                           |
| F(000)                                             | 512.0                                                           |
| Crystal size/mm <sup>3</sup>                       | 0.15 × 0.1 × 0.08                                               |
| R(int)                                             | 0.0824                                                          |
| R( $\sigma$ )                                      | 0.1006                                                          |
| Total reflections                                  | 15750                                                           |
| Independent reflections                            | 6425                                                            |
| 2 $\Theta$ range for data collection/ $^{\circ}$   | 5.296 to 58.278                                                 |
| Index ranges                                       | -8 ≤ h ≤ 10, -13 ≤ k ≤ 14, -21 ≤ l ≤ 21                         |
| R <sub>1</sub> ,wR <sub>2</sub> (I>2 $\sigma$ (I)) | 0.0722, 0.1890                                                  |
| R <sub>1</sub> ,wR <sub>2</sub> (for all data)     | 0.1222, 0.2350                                                  |
| Goodness-of-fit on F <sup>2</sup>                  | 1.046                                                           |
| Largest diff. peak/hole / e $\text{\AA}^{-3}$      | 0.40/-0.40                                                      |

### Spectral data of compounds 3:

**2-(2-(4-(phenylthio)phenyl)hydrazono)-1H-indene-1,3(2H)-dione (3a):** The compound was purified by column chromatography as red solid (294 mg, 82% yield) using 10% ethylacetate in hexane; m.p. 175°C; <sup>1</sup>H NMR (400 MHz, CDCl<sub>3</sub>): δ 7.31 (t, *J* = 4.4 Hz, 3H ),

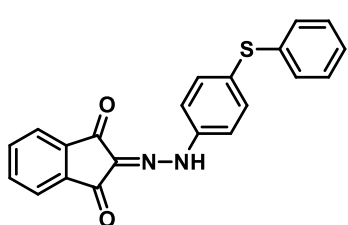

7.43-7.54 (m, 6H), 7.60-7.83 (m, 2H), 7.84-7.91 (m, 1H), 7.95-7.82 (s, 1H), 13.46 (s, 1H) ppm; <sup>13</sup>C{<sup>1</sup>H}NMR (101 MHz, CDCl<sub>3</sub>): δ 117.0, 121.0, 122.9, 123.2, 127.6, 128.9, 129.4, 131.0, 132.9, 134.2, 135.0, 135.4, 138.8, 140.3, 140.6, 186.0, 188.7 ppm; HRMS (ESI-TOF): Calcd for [C<sub>21</sub>H<sub>15</sub>O<sub>2</sub>N<sub>2</sub>S]<sup>+</sup> *m/z*

359.0855. Found 359.0880.

**2-(2-(4-((4-bromophenyl)thio)phenyl)hydrazono)-1H-indene-1,3(2H)-dione (3b):** The compound was purified by column chromatography as red solid (380 mg, 87% yield) using

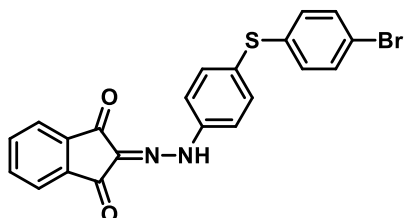

15% ethylacetate in hexane; m.p. 189°C; <sup>1</sup>H NMR (400 MHz, CDCl<sub>3</sub>): δ 7.19 (d, *J* = 10.8 Hz, 2H), 7.36-7.52 (m, 6H), 7.76-7.84 (m, 2H), 7.90 (t, *J* = 7.2 Hz, 1H), 7.98 (t, *J* = 6.8 Hz, 1H), 13.46 (s, 1H) ppm; <sup>13</sup>C{<sup>1</sup>H}NMR (101 MHz, CDCl<sub>3</sub>): δ 117.1, 121.1, 122.9, 123.3, 131.9, 132.3,

132.4, 132.9, 135.1, 135.2, 135.5, 138.8, 140.5, 140.7, 186.0, 188.7 ppm.; HRMS (ESI-TOF): Calcd for [C<sub>21</sub>H<sub>14</sub>O<sub>2</sub>N<sub>2</sub>BrS]<sup>+</sup> *m/z* 436.9960. Found 436.9997.

**2-(2-(4-((4-chlorophenyl)thio)phenyl)hydrazono)-1H-indene-1,3(2H)-dione (3c):** The compound was purified by column chromatography as red solid (334 mg, 85% yield) using 10% ethylacetate in hexane; m.p. 185°C; <sup>1</sup>H NMR (400 MHz, CDCl<sub>3</sub>): δ 7.26-7.31 (m, 4H), 7.40 (d, *J* = 8.0 Hz, 2H), 7.49 (d, *J* = 8.4 Hz, 2H), 7.77-7.83 (m, 2H), 7.91 (d, *J* = 6.4 Hz,

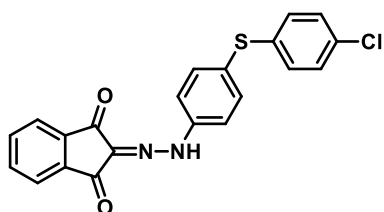

1H), 7.97 (d, *J* = 8.0 Hz, 1H), 13.46 (s, 1H) ppm; <sup>13</sup>C{<sup>1</sup>H}NMR (101 MHz, CDCl<sub>3</sub>): δ 117.0, 122.9, 123.3, 129.4, 131.2, 131.9, 132.7, 132.8, 133.2, 134.3, 135.1, 135.5, 138.8, 140.4, 140.7, 185.9, 188.7 ppm.; HRMS

(ESI-TOF): Calcd for [C<sub>21</sub>H<sub>14</sub>O<sub>2</sub>N<sub>2</sub>ClS]<sup>+</sup> *m/z* 393.0465. Found 393.0493.

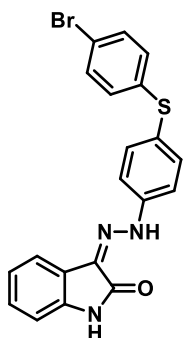

**(Z)-3-(2-(4-((4-bromophenyl)thio)phenyl)hydrazono)indolin-2-one (3d):**

The compound was purified by column chromatography as orange solid (322 mg, 76% yield) using 10% ethylacetate in hexane; m.p. 205°C; <sup>1</sup>H NMR (400 MHz, DMSO-*d*<sub>6</sub>): δ 6.92 (d, *J* = 8.0 Hz, 1H), 7.03-7.11 (m, 3H), 7.25 (t, *J* = 8.0 Hz, 1H), 7.43-7.56 (m, 7H), 11.06 (s, 1H), 12.76 (s, 1H)



ppm.;  $^{13}\text{C}\{^1\text{H}\}$ NMR (101 MHz, DMSO- $d_6$ ):  $\delta$  111.0, 115.8, 119.3, 119.6, 121.4, 122.4, 125.2, 129.2, 129.4, 130.3, 132.5, 135.3, 137.7, 140.6, 143.6, 165.7 ppm.; HRMS (ESI-TOF): Calcd for  $[\text{C}_{20}\text{H}_{15}\text{ON}_3\text{BrS}]^+ m/z$  424.0120. Found 424.0164.

**(Z)-5-methyl-3-(2-(4-(phenylthio)phenyl)hydrazono)indolin-2-one (3e):** The compound was purified by column chromatography as yellow solid (223 mg, 62% yield) using 10% ethylacetate in hexane; m.p. 192°C;  $^1\text{H}$  NMR (300 MHz,  $\text{CDCl}_3$ ):  $\delta$  2.39 (s, 3H), 6.82 (d,  $J$  =

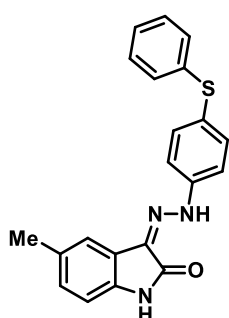

7.8 Hz, 1H), 7.07 (d,  $J$  = 7.8 Hz, 1H), 7.17 (t,  $J$  = 6.6 Hz, 2H), 7.23-7.26 (m, 3H), 7.37 (d,  $J$  = 8.7 Hz, 2H), 7.46 (t,  $J$  = 8.1 Hz, 3H), 7.85 (brs, 1H), 12.73 (s, 1H) ppm.;  $^{13}\text{C}\{^1\text{H}\}$ NMR (101 MHz,  $\text{CDCl}_3$ ):  $\delta$  21.1, 110.0, 115.2, 119.9, 121.8, 127.0, 127.1, 127.9, 129.1, 130.0, 132.0, 132.3, 134.6, 136.1, 136.5, 142.7, 163.6 ppm.; HRMS (ESI-TOF): Calcd for  $[\text{C}_{21}\text{H}_{18}\text{ON}_3\text{S}]^+ m/z$  360.1108. Found 360.1143.

**(Z)-3-(2-(4-((4-chlorophenyl)thio)phenyl)hydrazono)-5-methoxyindolin-2-one (3f):** The compound was purified by column chromatography as orange solid (246 mg, 60% yield) using 15% ethylacetate in hexane; m.p. 228°C;  $^1\text{H}$  NMR

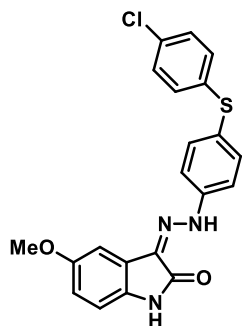

(400 MHz,  $\text{CDCl}_3$ ):  $\delta$  3.87 (s, 3H), 6.83 (s, 2H), 7.18 (d,  $J$  = 8.4 Hz, 2H), 7.24 (t,  $J$  = 9.2 Hz, 3H), 7.38 (d,  $J$  = 8.4 Hz, 2H), 7.45 (d,  $J$  = 8.4 Hz, 2H), 7.64 (brs, 1H), 12.79 (s, 1H) ppm.;  $^{13}\text{C}\{^1\text{H}\}$ NMR (101 MHz,  $\text{CDCl}_3$ ):  $\delta$  55.92, 104.5, 111.0, 115.0, 115.3, 122.6, 127.3, 128.0, 129.1, 130.1, 132.1, 134.5, 136.4, 142.6, 156.0, 163.7 ppm.; HRMS (ESI-TOF):

Calcd for  $[\text{C}_{21}\text{H}_{17}\text{O}_2\text{N}_3\text{ClS}]^+ m/z$  410.0731. Found 410.0783.

**(Z)-3-(2-(4-((4-chlorophenyl)thio)phenyl)hydrazono)-5-fluoroindolin-2-one (3g):** The

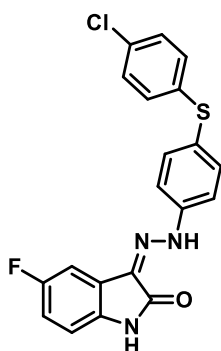

compound was purified by column chromatography as orange solid (358 mg, 90% yield) using 10% ethylacetate in hexane; m.p. 172°C;  $^1\text{H}$  NMR (400 MHz,  $\text{CDCl}_3$ ):  $\delta$  6.86 (t,  $J$  = 6.8 Hz, 1H), 6.97 (t,  $J$  = 10.0 Hz, 1H), 7.20 (t,  $J$  = 17.6 Hz, 3H), 7.36-7.46 (m, 6H), 7.63 (brs, 1H), 12.81 (s, 1H) ppm.;  $^{13}\text{C}\{^1\text{H}\}$ NMR (101 MHz, DMSO- $d_6$ ):  $\delta$  111.1 (d,  $^2J_{\text{C-F}}$  = 25.5 Hz), 116.7, 116.8, 120.4, 120.9, 127.5 (d,  $^3J_{\text{C-F}}$  = 8.9 Hz), 130.9, 134.5, 135.1, 136.2, 139.8, 141.5, 141.6, 148.0, 163.2 (d,  $^1J_{\text{C-F}}$  =

190.8 Hz), 168.4 ppm.;  $^{19}\text{F}\{^{13}\text{C}\}$ NMR (377 MHz, DMSO- $d_6$ ):  $\delta$  120.2 ppm.; HRMS (ESI-TOF): Calcd for  $[\text{C}_{20}\text{H}_{14}\text{ON}_3\text{ClFS}]^+ m/z$  398.0531. Found 398.0579.

**(Z)-3-(2-(4-((4-chlorophenyl)thio)phenyl)hydrazono)-5-nitroindolin-2-one (3h):** The

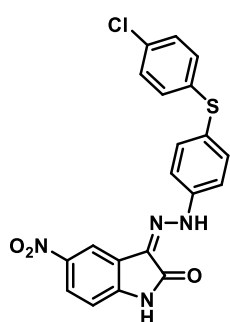

compound was purified by column chromatography as orange solid (391 mg, 92% yield) using 25% ethylacetate in hexane; m.p. above 250°C; <sup>1</sup>H NMR (400 MHz, CDCl<sub>3</sub>): δ 6.90-7.03 (m, 1H), 7.10-7.21 (m, 3H), 7.29-7.40 (m, 4H), 8.06-8.21 (m, 2H), 8.39 (t, *J* = 8.4 Hz, 1H), 10.92 (s, 1H), 12.83 (s, 1H) ppm.; <sup>13</sup>C{<sup>1</sup>H}NMR (101 MHz, CDCl<sub>3</sub>): δ 110.5, 110.7, 114.6, 115.6, 120.7, 124.2, 125.8, 127.3, 128.5, 129.1, 130.5, 134.0, 135.8, 141.9, 143.2, 164.3 ppm.; HRMS (ESI-TOF): Calcd for [C<sub>20</sub>H<sub>14</sub>O<sub>3</sub>N<sub>4</sub>ClS]<sup>+</sup>

*m/z* 425.0938. Found 425.0962.

**(Z)-3-(2-(4-((4-chlorophenyl)thio)phenyl)hydrazono)-1-ethylindolin-2-one (3i):** The

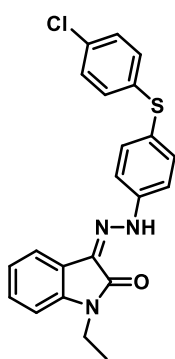

compound was purified by column chromatography as yellow solid (347 mg, 85% yield) using 5% ethylacetate in hexane; m.p. 135°C; <sup>1</sup>H NMR (400 MHz, CDCl<sub>3</sub>): δ 1.26 (t, *J* = 7.2 Hz, 3H), 3.76-3.82 (m, 2H), 6.85 (d, *J* = 8.0 Hz, 1H), 7.02-7.09 (m, 3H), 7.15 (d, *J* = 8.4 Hz, 2H), 7.21-7.28 (m, 3H), 7.35 (d, *J* = 8.4 Hz, 2H), 7.58 (d, *J* = 7.6 Hz, 1H), 12.77 (s, 1H) ppm.; <sup>13</sup>C{<sup>1</sup>H}NMR (101 MHz, CDCl<sub>3</sub>): δ 13.1, 34.2, 108.6, 115.2, 119.2, 121.1, 122.5, 126.8, 128.0, 128.4, 129.1, 130.0, 132.0, 134.6, 136.6, 140.3, 142.8,

161.9 ppm.; HRMS (ESI-TOF): Calcd for [C<sub>22</sub>H<sub>19</sub>ON<sub>3</sub>ClS]<sup>+</sup> *m/z* 408.0938. Found 408.0973.

**(Z)-3-(2-(4-((4-chlorophenyl)thio)phenyl)hydrazono)-1-propylindolin-2-one (3j):** The

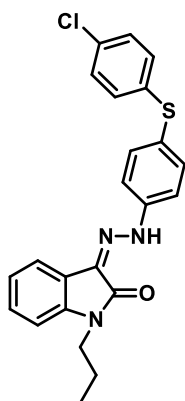

compound was purified by column chromatography as yellow solid (354 mg, 84% yield) using 5% ethylacetate in hexane; m.p. 142°C; <sup>1</sup>H NMR (300 MHz, CDCl<sub>3</sub>): δ 1.02 (t, *J* = 10.5 Hz, 3H), 1.75-1.84 (m, 2H), 3.81 (t, *J* = 3.6 Hz, 2H), 6.93 (d, *J* = 7.2 Hz, 1H), 7.11-7.18 (m, 4H), 7.24 (d, *J* = 8.1 Hz, 2H), 7.29-7.38 (m, 2H), 7.45 (d, *J* = 6.0 Hz, 2H), 7.67 (d, *J* = 5.4 Hz, 1H), 12.88 (s, 1H) ppm.; <sup>13</sup>C{<sup>1</sup>H}NMR (101 MHz, CDCl<sub>3</sub>): δ 11.4, 21.1, 41.1, 108.8, 115.2, 119.2, 121.0, 122.5, 126.8, 128.0, 128.4, 129.1, 129.3, 130.0, 132.0, 134.6, 140.7, 142.8, 162.3 ppm.; HRMS (ESI-TOF):

Calcd for [C<sub>23</sub>H<sub>21</sub>ON<sub>3</sub>ClS]<sup>+</sup> *m/z* 422.1095. Found 422.1133.

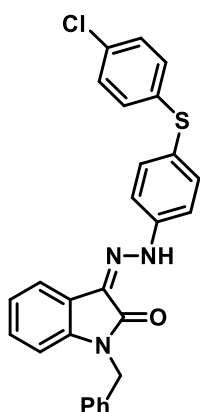

**(Z)-1-benzyl-3-(2-(4-((4-chlorophenyl)thio)phenyl)hydrazono)indolin-2-one (3k):** The compound was purified by column chromatography as yellow solid (400 mg, 85% yield) using 5% ethylacetate in hexane; m.p. 138°C; <sup>1</sup>H NMR (400 MHz, CDCl<sub>3</sub>): δ 5.02 (s, 2H), 6.83 (d, *J* = 8.0 Hz,

1H), 7.12 (t,  $J = 7.6$  Hz, 1H), 7.19 (t,  $J = 8.8$  Hz, 2H), 7.24 (t,  $J = 8.4$  Hz, 3H), 7.32-7.39 (m, 7H), 7.46 (d,  $J = 8.4$  Hz, 2H), 7.68 (d,  $J = 7.2$  Hz, 1H), 12.88 (s, 1H) ppm.;  $^{13}\text{C}\{^1\text{H}\}$ NMR (101 MHz,  $\text{CDCl}_3$ ):  $\delta$  43.2, 109.4, 115.2, 119.2, 121.1, 122.8, 127.1, 127.3, 127.7, 127.8, 128.4, 128.9, 129.1, 130.1, 132.1, 134.5, 135.6, 136.5, 140.4, 142.7, 162.2 ppm.; HRMS (ESI-TOF): Calcd for  $[\text{C}_{27}\text{H}_{21}\text{ON}_3\text{ClS}]^+ m/z$  470.1095. Found 470.1123.

**(Z)-3-(2-(4-((4-chlorophenyl)thio)phenyl)hydrazono)-1-phenylindolin-2-one (3l):** The

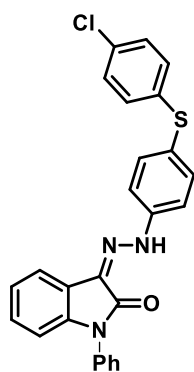

compound was purified by column chromatography as yellow solid (392 mg, 86% yield) using 10% ethylacetate in hexane; m.p.  $132^\circ\text{C}$ ;  $^1\text{H}$  NMR (300 MHz,  $\text{DMSO}-d_6$ ):  $\delta$  6.88 (d,  $J = 7.8$  Hz, 1H), 7.21 (d,  $J = 8.7$  Hz, 3H), 7.30 (t,  $J = 7.8$  Hz, 1H), 7.39 (d,  $J = 8.7$  Hz, 2H), 7.46-7.63 (m, 9H), 7.69 (d,  $J = 6.3$  Hz, 1H), 12.73 (s, 1H) ppm.;  $^{13}\text{C}\{^1\text{H}\}$ NMR (101 MHz,  $\text{DMSO}-d_6$ ):  $\delta$  110.1, 116.2, 119.4, 120.9, 123.5, 126.1, 127.0, 127.8, 128.7, 129.3, 129.7, 130.0, 130.3, 131.4, 133.8, 135.1, 136.8, 141.5, 143.4, 160.8 ppm.; HRMS (ESI-TOF): Calcd for  $[\text{C}_{26}\text{H}_{19}\text{ON}_3\text{ClS}]^+ m/z$

456.0938. Found 456.0970.

**(Z)-3-(2-(4-(phenylselanyl)phenyl)hydrazono)indolin-2-one (3m):** The compound was

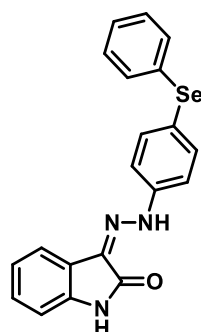

purified by column chromatography as orange solid (341 mg, 87% yield) using 10% ethylacetate in hexane; m.p.  $205^\circ\text{C}$ ;  $^1\text{H}$  NMR (400 MHz,  $\text{CDCl}_3+\text{DMSO}-d_6$ ):  $\delta$  6.85 (t,  $J = 7.2$  Hz, 1H), 6.92-7.00 (m, 1H), 7.11-7.18 (m, 4H), 7.23 (d,  $J = 5.2$  Hz, 1H), 7.28-7.32 (m, 3H), 7.43-7.47 (m, 2H), 7.51 (t,  $J = 6.8$  Hz, 1H), 9.92 (s, 1H), 12.75 (s, 1H) ppm.;  $^{13}\text{C}\{^1\text{H}\}$ NMR (101 MHz,  $\text{DMSO}-d_6$ ):  $\delta$  114.5, 120.7, 123.8, 125.3, 127.7, 130.3, 133.1, 134.1, 134.4, 134.9, 136.1, 140.0, 141.7, 146.6,

148.2, 166.3 ppm.; HRMS (ESI-TOF): Calcd for  $[\text{C}_{20}\text{H}_{16}\text{ON}_3\text{Se}]^+ m/z$  394.0460. Found 394.0513.

**(Z)-3-(2-(4-(phenylselanyl)phenyl)hydrazono)-1-propylindolin-2-one (3n):** The

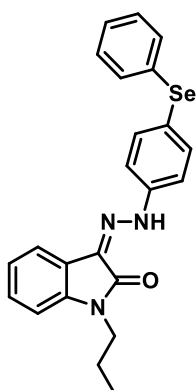

compound was purified by column chromatography as yellow solid (386 mg, 89% yield) using 5% ethylacetate in hexane; m.p.  $135^\circ\text{C}$ ;  $^1\text{H}$  NMR (400 MHz,  $\text{CDCl}_3$ ):  $\delta$  1.01 (t,  $J = 7.6$  Hz, 3H), 1.76-1.82 (m, 2H), 3.79 (t,  $J = 7.2$  Hz, 2H), 6.92 (d,  $J = 8.0$  Hz, 1H), 7.13 (t,  $J = 7.6$  Hz, 1H), 7.25-7.34 (m, 6H), 7.42 (d,  $J = 6.8$  Hz, 2H), 7.56 (d,  $J = 8.4$  Hz, 2H), 7.66 (d,  $J = 7.6$  Hz, 1H), 12.86 (s, 1H) ppm.;  $^{13}\text{C}\{^1\text{H}\}$ NMR (101 MHz,  $\text{CDCl}_3$ ):  $\delta$  11.5, 21.2, 41.1, 108.8, 115.2, 119.1, 121.1, 122.5, 123.2, 126.7, 127.7, 128.2,

129.2, 131.5, 132.6, 135.7, 140.6, 142.5, 162.3 ppm.; HRMS (ESI-TOF): Calcd for  $[C_{23}H_{22}ON_3Se]^+ m/z$  436.0929. Found 436.0955.

**2-(2-(4-(phenylselanyl)phenyl)hydrazono)-1H-indene-1,3(2H)-dione (3o):** The compound

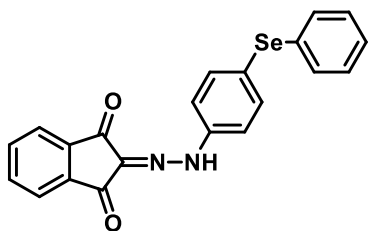

was purified by column chromatography as red solid (365 mg, 90% yield) using 10% ethylacetate in hexane; m.p. 197°C;  $^1H$  NMR (400 MHz,  $CDCl_3$ ):  $\delta$  7.31 (d,  $J$  = 2.8 Hz, 2H), 7.38-7.41 (m, 1H), 7.44-7.54 (m, 6H), 7.61 (d,  $J$  = 8.0 Hz, 1H), 7.80 (t,  $J$  = 4.4 Hz, 1H), 7.90 (d,  $J$  = 6.0 Hz, 1H), 7.97 (d,  $J$  = 7.6 Hz, 1H), 13.46 (s, 1H) ppm.;  $^{13}C\{^1H\}$  NMR (101 MHz,  $CDCl_3$ ):  $\delta$  117.0, 122.9, 123.2, 127.2, 127.6, 129.4, 131.0, 132.9, 134.2, 134.5, 135.0, 135.4, 138.8, 140.3, 140.6, 186.0, 188.7 ppm.; HRMS (ESI-TOF): Calcd for  $[C_{21}H_{15}O_2N_2Se]^+ m/z$  408.0299. Found 408.0354.

**(Z)-3-(2-(4-((4-chlorophenyl)thio)phenyl)hydrazono)indolin-2-one (3p):** The compound

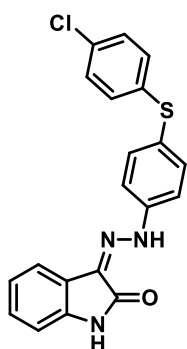

was purified by column chromatography as orange solid (288 mg, 76% yield) using 10% ethylacetate in hexane; m.p. 198°C;  $^1H$  NMR (300 MHz,  $CDCl_3$ ):  $\delta$  6.93 (d,  $J$  = 6.0 Hz, 1H), 7.13 (t,  $J$  = 6.0 Hz, 1H), 7.18 (d,  $J$  = 6.3 Hz, 2H), 7.24-7.27 (m, 3H), 7.38 (d,  $J$  = 6.6 Hz, 2H), 7.45 (d,  $J$  = 6.3 Hz, 2H), 7.66 (d,  $J$  = 5.7 Hz, 1H), 7.90 (brs, 1H), 12.75 (s, 1H) ppm.;  $^{13}C\{^1H\}$  NMR (101 MHz, DMSO- $d_6$ ):  $\delta$  111.0, 115.8, 119.3, 121.4, 122.4, 125.4, 129.4, 129.7, 130.2, 131.3, 135.3, 137.0, 140.6, 143.6, 145.3, 163.5

ppm.; HRMS (ESI-TOF): Calcd for  $[C_{20}H_{15}ON_3ClS]^+ m/z$  380.0625. Found 380.0659.

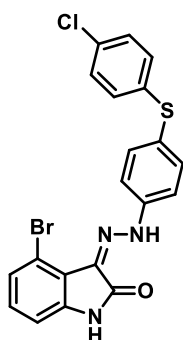

**(Z)-4-bromo-3-(2-(4-((4-chlorophenyl)thio)phenyl)hydrazono)indolin-2-**

**one (3q):** The compound was purified by column chromatography as orange solid (344 mg, 75% yield) using 10% ethylacetate in hexane; m.p. 220°C;  $^1H$  NMR (400 MHz,  $CDCl_3$ ):  $\delta$  6.93 (d,  $J$  = 8.0 Hz, 1H), 7.11-7.19 (m, 3H), 7.24-7.26 (m, 2H), 7.38 (d,  $J$  = 8.4 Hz, 2H), 7.45 (d,  $J$  = 8.4 Hz, 2H), 7.66 (d,  $J$  = 7.6 Hz, 1H), 7.78 (brs, 1H), 12.76 (s, 1H) ppm.;  $^{13}C\{^1H\}$  NMR (101

MHz,  $CDCl_3$ ):  $\delta$  110.3, 115.3, 119.4, 121.8, 122.8, 127.3, 127.6, 128.5, 129.1, 130.1, 132.1, 134.5, 136.4, 138.2, 142.6, 163.3 ppm.; HRMS (ESI-TOF): Calcd for  $[C_{20}H_{14}ON_3ClBrS]^+ m/z$  457.9730. Found 457.9764.

**(Z)-7-bromo-3-(2-(4-(phenylthio)phenyl)hydrazono)indolin-2-one (3r):** The compound was purified by column chromatography as orange solid (327 mg, 77% yield) using 15%

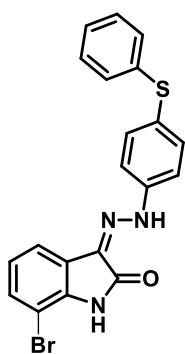

ethylacetate in hexane; m.p. 210°C;  $^1\text{H}$  NMR (400 MHz,  $\text{CDCl}_3$ ):  $\delta$  6.93 (d,  $J = 7.6$  Hz, 1H), 7.13 (t,  $J = 7.6$  Hz, 1H), 7.19-7.27(m, 3H), 7.29-7.31 (m, 2H), 7.37 (d,  $J = 8.8$  Hz, 2H), 7.46 (d,  $J = 8.8$  Hz, 2H), 7.66 (d,  $J = 7.6$  Hz, 1H), 7.85 (brs, 1H), 12.76 (s, 1H) ppm.;  $^{13}\text{C}\{^1\text{H}\}$ NMR (101 MHz,  $\text{CDCl}_3$ ):  $\delta$  110.2, 115.2, 119.3, 121.8, 122.8, 126.2, 127.4, 128.1, 128.4, 129.0, 129.1, 134.2, 137.6, 138.2, 142.3, 163.4 ppm.; HRMS (ESI-TOF): Calcd for  $[\text{C}_{20}\text{H}_{15}\text{ON}_3\text{BrS}]^+ m/z$  424.0120. Found 424.0175.

**(Z)-3-(2-(4-((4-bromophenyl)thio)phenyl)hydrazono)-7-chloroindolin-2-one (3s):** The compound was purified by column chromatography as orange solid (358 mg, 78% yield)

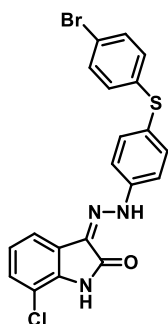

using 15% ethylacetate in hexane; m.p. 214°C;  $^1\text{H}$  NMR (400 MHz,  $\text{CDCl}_3$ ):  $\delta$  6.97-7.04 (m, 2H), 7.23-7.37 (m, 6H), 7.42-7.49 (m, 2H), 7.54 (d,  $J = 6.0$  Hz, 1H), 7.68 (s, 1H), 12.72 (s, 1H) ppm.;  $^{13}\text{C}\{^1\text{H}\}$ NMR (101 MHz,  $\text{CDCl}_3$ ):  $\delta$  115.5, 117.5, 123.2, 123.6, 127.0, 127.9, 128.3, 129.2, 130.5, 132.3, 134.2, 135.4, 136.0, 142.1, 162.5 ppm.; HRMS (ESI-TOF): Calcd for  $[\text{C}_{20}\text{H}_{14}\text{ON}_3\text{ClBrS}]^+ m/z$  457.9730. Found 457.9777.

**(Z)-7-chloro-3-(2-(4-((4-chlorophenyl)thio)phenyl)hydrazono)indolin-2-one (3t):** The

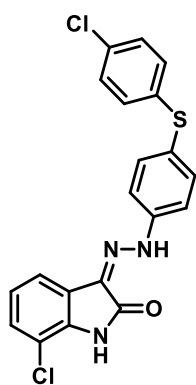

compound was purified by column chromatography as orange solid (315 mg, 76% yield) using 15% ethylacetate in hexane; m.p. 208°C;  $^1\text{H}$  NMR (400 MHz,  $\text{CDCl}_3$ ):  $\delta$  7.08 (t,  $J = 7.8$  Hz, 1H), 7.19 (d,  $J = 8.4$  Hz, 2H), 7.25 (s, 3H), 7.37-7.45 (m, 4H), 7.56 (d,  $J = 7.6$  Hz, 1H), 7.86 (brs, 1H), 12.81 (s, 1H) ppm.;  $^{13}\text{C}\{^1\text{H}\}$ NMR (101 MHz,  $\text{CDCl}_3$ ):  $\delta$  114.6, 115.5, 117.5, 123.2, 123.5, 127.0, 127.9, 128.3, 129.2, 130.5, 132.3, 134.2, 135.4, 136.0, 142.1, 162.5 ppm.; HRMS (ESI-TOF): Calcd for  $[\text{C}_{20}\text{H}_{14}\text{ON}_3\text{Cl}_2\text{S}]^+ m/z$  414.0235. Found 414.0272.

**(Z)-3-(2-(4-((4-chlorophenyl)thio)phenyl)hydrazono)-5-iodoindolin-2-one (3u):** The

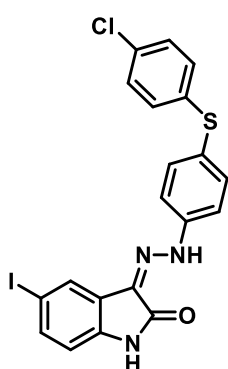

compound was purified by column chromatography as orange solid (405 mg, 80% yield) using 10% ethylacetate in hexane; m.p. 235°C;  $^1\text{H}$  NMR (300 MHz,  $\text{DMSO}-d_6$ ): 6.96-6.77 (m, 3H), 7.17 (d,  $J = 8.7$  Hz, 1H), 7.32-7.42 (m, 2H), 7.53 (t,  $J = 10.5$  Hz, 1H), 7.62-7.65 (m, 4H), 10.66 (s, 1H), 12.70 (brs, 1H) ppm.;  $^{13}\text{C}\{^1\text{H}\}$ NMR (101 MHz,  $\text{DMSO}-$

d<sub>6</sub>):  $\delta$  101.3, 118.2, 120.9, 132.4, 132.8, 134.4, 135.1, 138.2, 138.3, 139.6, 144.3, 144.4, 146.4, 146.5, 167.6, 176.3 ppm.; HRMS (ESI-TOF): Calcd for [C<sub>20</sub>H<sub>14</sub>ON<sub>3</sub>ClIS]<sup>+</sup>  $m/z$  505.9592. Found 505.9645.

**(Z)-3-(2-(4-((4-bromophenyl)thio)phenyl)hydrazono)-1-propylindolin-2-one (3v):** The

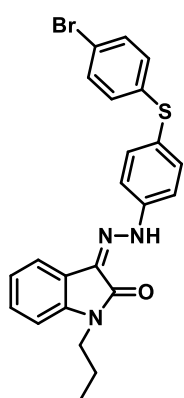

compound was purified by column chromatography as yellow solid (410 mg, 88% yield) using 5% ethylacetate in hexane; m.p. 138°C; <sup>1</sup>H NMR (400 MHz, CDCl<sub>3</sub>):  $\delta$  1.02 (t,  $J$  = 7.6 Hz, 3H), 1.75-1.84 (m, 2H), 3.79 (t,  $J$  = 7.2 Hz, 2H), 6.93 (d,  $J$  = 8.0 Hz, 1H), 7.09-7.17 (m, 3H), 7.31 (t,  $J$  = 7.6 Hz, 1H), 7.38 (t,  $J$  = 8.4 Hz, 4H), 7.45 (d,  $J$  = 8.4 Hz, 2H), 7.67 (d,  $J$  = 7.6 Hz, 1H), 12.88 (s, 1H) ppm.; <sup>13</sup>C{<sup>1</sup>H}NMR (101 MHz, CDCl<sub>3</sub>):  $\delta$  11.5, 21.1, 41.1, 108.8, 115.2, 119.2, 119.8, 121.0, 122.5, 126.5, 128.0, 128.4, 130.1, 132.0, 134.8, 137.4, 140.7, 142.9, 162.3 ppm.; HRMS (ESI-TOF):

Calcd for [C<sub>23</sub>H<sub>21</sub>ON<sub>3</sub>BrS]<sup>+</sup>  $m/z$  466.0589. Found 466.0639.

**(Z)-3-(2-(4-((2-bromophenyl)thio)phenyl)hydrazono)-1-propylindolin-2-one (3w):** The compound was purified by column chromatography as yellow solid (406 mg, 87% yield)

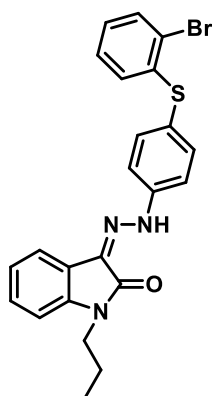

using 5% ethylacetate in hexane; m.p. 148°C; <sup>1</sup>H NMR (300 MHz, CDCl<sub>3</sub>):  $\delta$  1.02 (t,  $J$  = 7.5 Hz, 3H), 1.74-1.83 (m, 2H), 3.80 (t,  $J$  = 7.2 Hz, 2H), 6.81 (d,  $J$  = 9.0 Hz, 1H), 6.92-7.02 (m, 2H), 7.14 (t,  $J$  = 7.5 Hz, 2H), 7.32 (t,  $J$  = 8.1 Hz, 1H), 7.42 (d,  $J$  = 8.7 Hz, 2H), 7.52-7.56 (m, 3H), 7.68 (d,  $J$  = 7.2 Hz, 1H), 12.91 (s, 1H) ppm.; <sup>13</sup>C{<sup>1</sup>H}NMR (101 MHz, CDCl<sub>3</sub>):  $\delta$  6.7, 16.4, 36.4, 104.1, 110.6, 114.5, 116.2, 116.5, 117.8, 120.0, 121.7, 122.9, 123.2, 123.5, 123.7, 128.0, 131.6, 135.6, 136.0, 138.7, 157.5 ppm.; HRMS (ESI-TOF): Calcd for [C<sub>23</sub>H<sub>21</sub>ON<sub>3</sub>BrS]<sup>+</sup>  $m/z$  466.0589. Found 466.0651.

**(Z)-3-(2-(4-((4-fluorophenyl)thio)phenyl)hydrazono)-1-propylindolin-2-one (3x):** The compound was purified by column chromatography as yellow solid (365 mg, 90% yield)

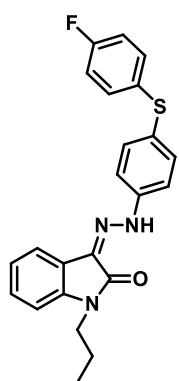

using 5% ethylacetate in hexane; m.p. 126°C; <sup>1</sup>H NMR (400 MHz, CDCl<sub>3</sub>):  $\delta$  1.01 (t,  $J$  = 7.6 Hz, 3H), 1.74-1.84 (m, 2H), 3.79 (t,  $J$  = 7.2 Hz, 2H), 6.92 (d,  $J$  = 8.0 Hz, 1H), 7.01 (t,  $J$  = 8.4 Hz, 2H), 7.13 (t,  $J$  = 7.6 Hz, 1H), 7.28-7.32 (m, 5H), 7.39 (d,  $J$  = 8.4 Hz, 2H), 7.66 (d,  $J$  = 7.6 Hz, 1H), 12.86 (s, 1H) ppm.; <sup>13</sup>C{<sup>1</sup>H}NMR (101 MHz, CDCl<sub>3</sub>):  $\delta$  11.5, 21.2, 41.1, 108.8, 115.1, 116.2 (d, <sup>2</sup> $J_{C-F}$  = 22.0 Hz), 119.1, 121.1, 122.5, 127.7, 128.4 (d, <sup>3</sup> $J_{C-F}$  = 8.1 Hz), 131.9, 132.0, 132.2, 133.4, 140.6, 142.3, 161.8 (d, <sup>1</sup> $J_{C-F}$  = 247.2 Hz), 162.2 ppm.;

$^{19}\text{F}\{^{13}\text{C}\}$ NMR (377 MHz,  $\text{CDCl}_3$ ):  $\delta$  115.3 ppm.; HRMS (ESI-TOF): Calcd for  $[\text{C}_{23}\text{H}_{21}\text{ON}_3\text{FS}]^+ m/z$  406.1390. Found 406.1435.

**(Z)-1-propyl-3-(2-(4-(p-tolylthio)phenyl)hydrazono)indolin-2-one (3y):** The compound was purified by column chromatography as orange solid (345 mg, 86% yield) using 5%

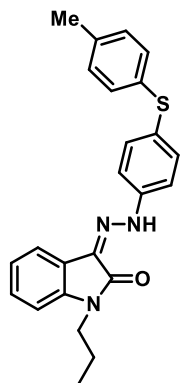

ethylacetate in hexane; m.p.  $120^\circ\text{C}$ ;  $^1\text{H}$  NMR (400 MHz,  $\text{CDCl}_3$ ):  $\delta$  1.01 (t,  $J = 7.6$  Hz, 3H), 1.76-1.84 (m, 2H), 2.34 (s, 3H), 3.79 (t,  $J = 7.2$  Hz, 2H), 6.92 (d,  $J = 7.6$  Hz, 1H), 7.11-7.14 (m, 3H), 7.23 (d,  $J = 8.0$  Hz, 2H), 7.31 (t,  $J = 8.4$  Hz, 3H), 7.39 (d,  $J = 8.4$  Hz, 2H), 7.66 (d,  $J = 7.6$  Hz, 1H), 12.86 (s, 1H) ppm.;  $^{13}\text{C}\{^1\text{H}\}$ NMR (101 MHz,  $\text{CDCl}_3$ ):  $\delta$  11.5, 21.070, 21.071, 41.1, 108.8, 115.0, 119.1, 121.1, 122.5, 127.5, 128.1, 129.1, 129.9, 130.3, 133.1, 133.3, 136.6, 140.5, 142.0, 162.3 ppm.; HRMS (ESI-TOF): Calcd for  $[\text{C}_{24}\text{H}_{24}\text{ON}_3\text{S}]^+ m/z$  402.1641. Found 402.1678.

**(Z)-7-chloro-3-(2-(4-((4-chlorophenyl)thio)phenyl)hydrazono)-1-phenylindolin-2-one (3z):**

The compound was purified by column chromatography as yellow solid (417 mg, 85%

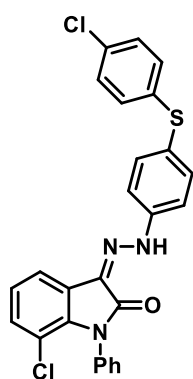

yield) using 5% ethylacetate in hexane; m.p.  $128^\circ\text{C}$ ;  $^1\text{H}$  NMR (400 MHz,  $\text{CDCl}_3$ ):  $\delta$  6.97 (d,  $J = 8.8$  Hz, 1H), 7.19 (d,  $J = 13.2$  Hz, 2H), 7.25 (s, 1H), 7.39 (t,  $J = 8.4$  Hz, 3H), 7.44-7.50 (m, 6H), 7.59 (t,  $J = 11.2$  Hz, 2H), 7.75 (d,  $J = 12.0$  Hz, 1H), 12.95 (s, 1H) ppm.;  $^{13}\text{C}\{^1\text{H}\}$ NMR (101 MHz,  $\text{CDCl}_3$ ):  $\delta$  109.9, 115.3, 119.2, 121.0, 123.2, 126.3, 127.4, 127.5, 128.3, 129.1, 129.4, 129.7, 130.2, 132.1, 133.6, 134.4, 136.4, 141.0, 142.6, 161.6 ppm.; HRMS (ESI-TOF): Calcd for  $[\text{C}_{26}\text{H}_{17}\text{ON}_3\text{Cl}_2\text{S}]^+ m/z$

490.0548. Found 490.0583.

**(Z)-3-(2-(4-((4-bromophenyl)selanyl)phenyl)hydrazono)-1-methylindolin-2-one (3aa):**

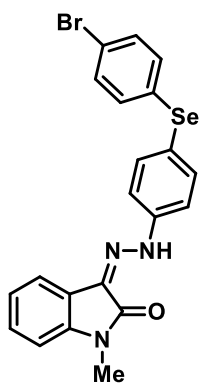

The compound was purified by column chromatography as yellow solid (427 mg, 88% yield) using 10% ethylacetate in hexane; m.p.  $142^\circ\text{C}$ ;  $^1\text{H}$  NMR (400 MHz,  $\text{CDCl}_3$ ):  $\delta$  3.36 (s, 3H), 6.91 (d,  $J = 7.6$  Hz, 1H), 7.09-7.16 (m, 3H), 7.30-7.39 (m, 5H), 7.45 (d,  $J = 8.4$  Hz, 2H), 6.91 (d,  $J = 7.6$  Hz, 1H), 7.65 (d,  $J = 7.6$  Hz, 1H), 12.83 (s, 1H) ppm.;  $^{13}\text{C}\{^1\text{H}\}$ NMR (101 MHz,  $\text{CDCl}_3$ ):  $\delta$  25.5, 108.5, 115.2, 119.1, 119.8, 120.9, 122.7, 126.5, 127.9, 128.5, 130.1, 132.0, 134.8, 137.4, 141.2, 142.9, 162.2 ppm.; HRMS (ESI-TOF): Calcd for  $[\text{C}_{21}\text{H}_{17}\text{ON}_3\text{BrSe}]^+ m/z$  485.9721. Found

485.9763.

**(Z)-3-(2-(4-((4-chlorophenyl)selanyl)phenyl)hydrazono)indolin-2-one (3ab):** The

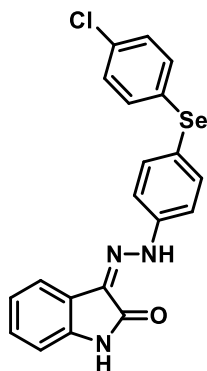

compound was purified by column chromatography as yellow solid (367 mg, 86% yield) using 15% ethylacetate in hexane; m.p. 138°C;  $^1\text{H}$  NMR (400 MHz,  $\text{CDCl}_3$ ):  $\delta$  6.83-6.95 (m, 1H), 6.97-7.11 (m, 1H), 7.14-7.30 (m, 7H), 7.44-7.51 (m, 3H), 9.92 (s, 1H), 12.79 (s, 1H) ppm.;  $^{13}\text{C}\{^1\text{H}\}$  NMR (101 MHz,  $\text{CDCl}_3$ ):  $\delta$  110.6, 112.5, 115.0, 119.0, 121.5, 122.1, 122.7, 126.7, 128.3, 129.2, 131.3, 132.5, 135.7, 139.5, 142.6, 164.0 ppm.; HRMS (ESI-TOF): Calcd for  $[\text{C}_{20}\text{H}_{15}\text{ON}_3\text{ClSe}]^+ m/z$  428.0070. Found 428.0123.

#### Spectral data of compounds 4:

**1-(4-(phenylthio)phenyl)-3-(p-tolyl)isochromeno[4,3-c]pyrazol-5(1H)-one (4a):** The compound was purified by column chromatography as white solid (405 mg, 88% yield) using

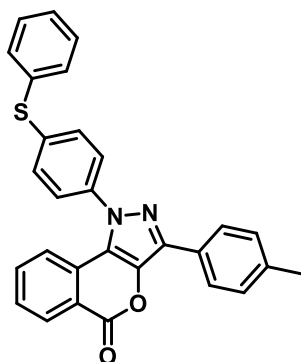

7% ethylacetate in hexane; m.p. 172°C;  $^1\text{H}$  NMR (400 MHz,  $\text{CDCl}_3 + \text{DMSO}-d_6$ ):  $\delta$  2.31 (s, 3H), 7.17-7.19 (m, 3H), 7.29-7.36 (m, 4H), 7.41-7.45 (m, 5H), 7.51-7.55 (m, 2H), 7.92-7.96 (m, 2H), 8.34 (d,  $J = 7.6$  Hz, 1H) ppm.;  $^{13}\text{C}\{^1\text{H}\}$  NMR (101 MHz,  $\text{CDCl}_3 + \text{DMSO}-d_6$ ):  $\delta$  21.3, 119.5, 120.9, 123.5, 126.2, 127.1, 127.3, 127.9, 128.3, 128.5, 129.3, 129.6, 129.9, 132.0, 132.9, 133.1, 134.7, 136.6, 137.6, 138.2, 138.3, 139.4, 161.4 ppm.;

HRMS (ESI-TOF): Calcd for  $[\text{C}_{29}\text{H}_{21}\text{O}_2\text{N}_2\text{S}]^+ m/z$  461.1324. Found 461.1371.

**3-(4-methoxyphenyl)-1-(4-(phenylthio)phenyl)isochromeno[4,3-c]pyrazol-5(1H)-one**

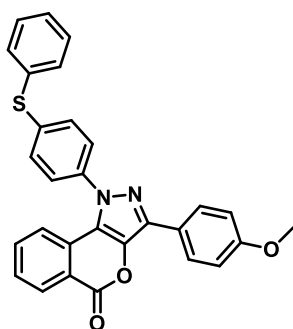

**(4b):** The compound was purified by column chromatography as white solid (386 mg, 81% yield) using 7% ethylacetate in hexane; m.p. 198°C;  $^1\text{H}$  NMR (400 MHz,  $\text{CDCl}_3$ ):  $\delta$  3.86 (s, 3H), 6.98 (d,  $J = 8.8$  Hz, 2H), 7.27 (d,  $J = 8.0$  Hz, 1H), 7.38-7.46 (m, 5H), 7.51-7.55 (m, 5H), 7.60 (t,  $J = 7.6$  Hz, 1H), 8.07 (d,  $J = 8.4$  Hz, 2H), 8.42 (d,  $J = 8.0$  Hz, 1H) ppm.;  $^{13}\text{C}\{^1\text{H}\}$  NMR (101 MHz,  $\text{CDCl}_3$ ):  $\delta$  55.3, 114.1, 116.9, 119.6, 121.0, 122.8, 123.5, 127.2, 127.8, 128.4,

129.6, 130.1, 131.0, 132.1, 132.9, 133.3, 134.7, 136.5, 137.6, 138.4, 139.3, 159.8, 161.4 ppm.; HRMS (ESI-TOF): Calcd for  $[\text{C}_{29}\text{H}_{21}\text{O}_3\text{N}_2\text{S}]^+ m/z$  477.1274. Found 477.1309.

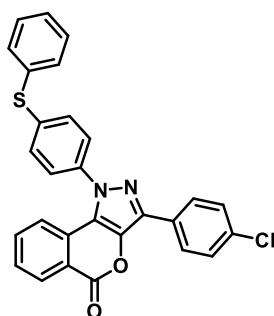

**3-(4-chlorophenyl)-1-(4-(phenylthio)phenyl)isochromeno[4,3-c]pyrazol-5(1H)-one (4c):** The compound was purified by column chromatography as white solid (408 mg, 85% yield) using 5%



ethylacetate in hexane; m.p. >250°C;  $^1\text{H}$  NMR (400 MHz,  $\text{CDCl}_3$ ):  $\delta$  7.284 (d,  $J = 1.6$  Hz, 1H), 7.40-7.45 (m, 7H), 7.50-7.57 (m, 5H), 7.62 (t,  $J = 6.4$  Hz, 1H), 8.08 (d,  $J = 16.4$  Hz, 2H), 8.45 (d,  $J = 8.0$  Hz, 1H) ppm.;  $^{13}\text{C}\{^1\text{H}\}$  NMR (101 MHz,  $\text{CDCl}_3$ ):  $\delta$  119.6, 121.0, 123.8, 127.1, 127.6, 127.8, 128.5, 128.7, 128.8, 128.9, 129.7, 129.9, 132.3, 133.10, 133.2, 134.3, 134.8, 136.6, 136.8, 138.1, 139.9, 161.2 ppm.; HRMS (ESI-TOF): Calcd for  $[\text{C}_{28}\text{H}_{18}\text{O}_2\text{N}_2\text{ClS}]^+ m/z$  480.0699. Found 480.0754.

**1-(4-((4-bromophenyl)thio)phenyl)-3-phenylisochromeno[4,3-c]pyrazol-5(1H)-one (4d):**

The compound was purified by column chromatography as white solid (462 mg, 88% yield)

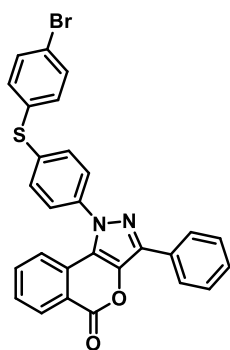

using 7% ethylacetate in hexane; m.p. 191°C;  $^1\text{H}$  NMR (400 MHz,  $\text{CDCl}_3$ ):  $\delta$  7.30 (d,  $J = 7.2$  Hz, 1H), 7.37-7.43 (m, 3H), 7.47-7.52 (m, 4H), 7.54-7.58 (m, 5H), 7.64 (t,  $J = 8.0$  Hz, 1H), 8.18 (d,  $J = 7.6$  Hz, 2H), 8.48 (d,  $J = 7.6$  Hz, 1H) ppm.;  $^{13}\text{C}\{^1\text{H}\}$  NMR (101 MHz,  $\text{CDCl}_3$ ):  $\delta$  119.8, 120.9, 122.5, 123.7, 126.5, 127.3, 127.9, 128.6, 128.73, 128.79, 130.1, 130.6, 132.3, 132.7, 132.9, 134.0, 134.7, 137.0, 137.9, 138.5, 138.7, 161.4 ppm.; HRMS (ESI-TOF): Calcd for  $[\text{C}_{28}\text{H}_{18}\text{O}_2\text{N}_2\text{BrS}]^+ m/z$  525.0273. Found 525.0309.

**1-(4-((4-bromophenyl)thio)phenyl)-3-(p-tolyl)isochromeno[4,3-c]pyrazol-5(1H)-one (4e):**

The compound was purified by column chromatography as white solid (442 mg, 82% yield)

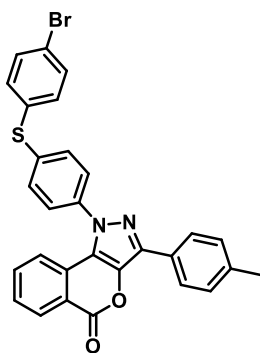

using 7% ethylacetate in hexane; m.p. 227°C;  $^1\text{H}$  NMR (400 MHz,  $\text{CDCl}_3$ ):  $\delta$  2.48 (s, 3H), 7.29-7.31 (m, 3H), 7.38 (d,  $J = 8.0$  Hz, 2H), 7.48 (d,  $J = 7.2$  Hz, 2H), 7.56 (t,  $J = 8.4$  Hz, 5H), 7.63 (t,  $J = 7.6$  Hz, 1H), 8.07 (d,  $J = 7.6$  Hz, 2H), 8.48 (d,  $J = 7.6$  Hz, 1H) ppm.;  $^{13}\text{C}\{^1\text{H}\}$  NMR (101 MHz,  $\text{CDCl}_3$ ):  $\delta$  21.4, 119.8, 120.9, 122.5, 123.6, 126.4, 127.2, 127.3, 128.0, 128.6, 129.4, 130.7, 132.3, 132.7, 133.0, 134.0, 134.7, 136.9, 138.0, 138.4, 138.6, 138.8, 161.4

ppm.; HRMS (ESI-TOF): Calcd for  $[\text{C}_{29}\text{H}_{20}\text{O}_2\text{N}_2\text{BrS}]^+ m/z$  539.0351. Found 539.0397.

**1-(4-((4-bromophenyl)thio)phenyl)-3-(4-methoxyphenyl)isochromeno[4,3-c]pyrazol-**

**5(1H)-one (4f):** The compound was purified by column chromatography as white solid (466

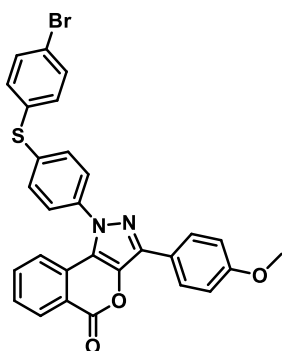

mg, 84% yield) using 7% ethylacetate in hexane; m.p. 192°C;  $^1\text{H}$  NMR (400 MHz,  $\text{DMSO}-d_6$ ):  $\delta$  3.81 (s, 3H), 7.10 (d,  $J = 11.6$  Hz, 2H), 7.20 (d,  $J = 10.4$  Hz, 1H), 7.45 (d,  $J = 11.2$  Hz, 2H), 7.54 (d,  $J = 11.2$  Hz, 2H), 7.63-7.71 (m, 5H), 7.80 (t,  $J = 9.6$  Hz, 1H), 7.94 (d,  $J = 11.6$  Hz, 2H), 8.33 (d,  $J = 9.6$  Hz, 1H) ppm.;  $^{13}\text{C}\{^1\text{H}\}$  NMR (101

MHz, DMSO- $d_6$ ):  $\delta$  55.6, 114.9, 119.6, 121.3, 122.0, 122.9, 124.0, 127.7, 127.8, 128.1, 129.5, 131.3, 132.0, 133.2, 133.4, 134.2, 135.9, 136.3, 136.8, 137.4, 139.1, 159.9, 161.1 ppm.; HRMS (ESI-TOF): Calcd for  $[C_{29}H_{20}O_3N_2BrS]^+ m/z$  555.0379. Found 555.0434.

### 3-(4-bromophenyl)-1-(4-((4-bromophenyl)thio)phenyl)isochromeno[4,3-c]pyrazol-

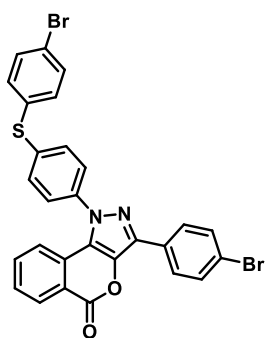

**5(1H)-one (4g):** The compound was purified by column chromatography as white solid (538 mg, 89% yield) using 7% ethylacetate in hexane; m.p. 185°C;  $^1H$  NMR (400 MHz,  $CDCl_3$ ):  $\delta$  7.28 (d,  $J$  = 8.0 Hz, 1H), 7.40 (t,  $J$  = 8.4 Hz, 2H), 7.46 (t,  $J$  = 12.4 Hz, 2H), 7.53-7.57 (m, 3H), 7.60-7.68 (m, 4H), 7.76 (d,  $J$  = 8.4 Hz, 1H), 8.05 (d,  $J$  = 8.4 Hz, 2H), 8.47 (d,  $J$  = 6.4 Hz, 1H) ppm.;  $^{13}C\{^1H\}$  NMR (101 MHz,  $CDCl_3$ ):  $\delta$  119.7, 120.9, 122.6, 123.8,

127.2, 127.8, 127.9, 128.6, 128.8, 129.1, 130.4, 131.1, 131.9, 132.3, 132.7, 132.8, 133.3, 134.2, 134.8, 138.5, 138.9, 161.2 ppm.; HRMS (ESI-TOF): Calcd for  $[C_{28}H_{17}O_2N_2Br_2S]^+ m/z$  604.9358. Found 604.9402.

### 3-(3-bromophenyl)-1-(4-((4-bromophenyl)thio)phenyl)isochromeno[4,3-c]pyrazol-

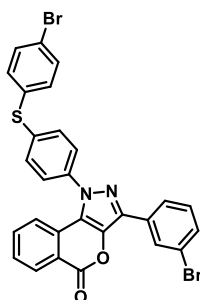

**5(1H)-one (4h):** The compound was purified by column chromatography as white solid (508 mg, 84% yield) using 7% ethylacetate in hexane; m.p. 182°C;  $^1H$  NMR (400 MHz,  $CDCl_3$ ):  $\delta$  7.29-7.30 (m, 1H), 7.35-7.43 (m, 3H), 7.45-7.60 (m, 8H), 7.64 (t,  $J$  = 7.6 Hz, 1H), 8.14 (d,  $J$  = 7.6 Hz, 1H), 8.31 (s, 1H), 8.49 (d,  $J$  = 7.6 Hz, 1H) ppm.;  $^{13}C\{^1H\}$  NMR (101 MHz,  $CDCl_3$ ):  $\delta$  119.8, 120.9, 122.6,

122.9, 123.9, 125.2, 127.1, 127.2, 127.8, 128.5, 128.84, 128.89, 129.0, 129.7, 129.9, 130.3, 130.4, 131.5, 132.4, 132.8, 133.1, 134.2, 134.8, 161.1 ppm.; HRMS (ESI-TOF): Calcd for  $[C_{28}H_{17}O_2N_2Br_2S]^+ m/z$  604.9279. Found 604.9318.

### 3-(2-bromophenyl)-1-(4-((4-bromophenyl)thio)phenyl)isochromeno[4,3-c]pyrazol-

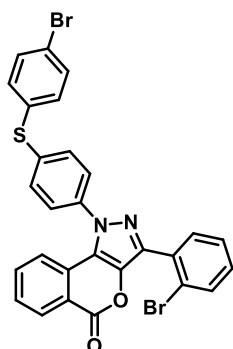

**5(1H)-one (4i):** The compound was purified by column chromatography as white solid (483 mg, 80% yield) using 5% ethylacetate in hexane; m.p. 170°C;  $^1H$  NMR (400 MHz,  $CDCl_3$ ):  $\delta$  7.28-7.37 (m, 4H), 7.42-7.49 (m, 2H), 7.52-7.58 (m, 4H), 7.60-7.66 (m, 3H), 7.75 (t,  $J$  = 8.4 Hz, 1H), 7.82-7.85 (m, 1H), 8.48 (t,  $J$  = 8.0 Hz, 1H) ppm.;  $^{13}C\{^1H\}$  NMR (101 MHz,  $CDCl_3$ ):  $\delta$  120.0, 121.0, 123.4, 127.2, 127.3, 127.9, 128.2, 128.8, 128.9, 129.2, 130.2, 130.5,

130.6, 130.9, 131.9, 132.3, 132.7, 133.4, 133.9, 134.7, 138.5, 138.7, 138.9, 161.2 ppm.; HRMS (ESI-TOF): Calcd for  $[C_{28}H_{17}O_2N_2Br_2S]^+ m/z$  604.9279. Found 604.9335.

**1-(4-((4-bromophenyl)thio)phenyl)-3-(4-chlorophenyl)isochromeno[4,3-c]pyrazol-5(1H)-**

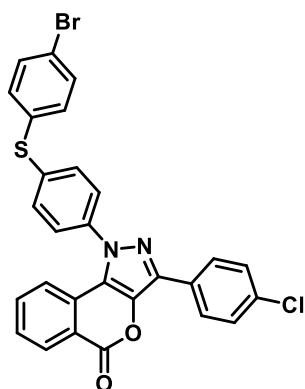

**one (4j):** The compound was purified by column chromatography as white solid (492 mg, 88% yield) using 7% ethylacetate in hexane; m.p. 240°C;  $^1\text{H}$  NMR (400 MHz,  $\text{CDCl}_3+\text{DMSO}-d_6$ ):  $\delta$  7.21-7.28 (m, 2H), 7.34-7.41 (m, 7H), 7.47-7.49 (m, 3H), 7.51-7.58 (m, 1H), 8.02-8.06 (m, 2H), 8.38-8.40 (m, 1H) ppm.;  $^{13}\text{C}\{^1\text{H}\}$  NMR (101 MHz,  $\text{CDCl}_3+\text{DMSO}-d_6$ ):  $\delta$  119.6, 120.9, 123.8, 127.1, 127.6, 127.7, 128.7, 128.8, 128.9, 129.8, 130.1, 131.8, 132.2, 134.1, 134.3, 134.6, 134.8, 136.6, 136.7, 138.4,

139.1, 161.1 ppm.; HRMS (ESI-TOF): Calcd for  $[\text{C}_{28}\text{H}_{17}\text{O}_2\text{N}_2\text{BrClS}]^+ m/z$  558.9883. Found 558.9926.

**1-(4-((4-chlorophenyl)thio)phenyl)-3-phenylisochromeno[4,3-c]pyrazol-5(1H)-one (4k):**

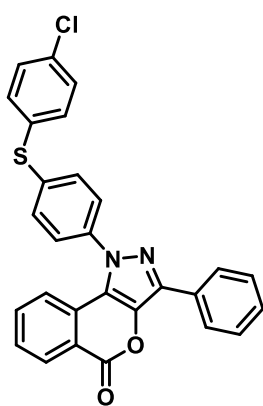

The compound was purified by column chromatography as white solid (418 mg, 87% yield) using 7% ethylacetate in hexane; m.p. 182°C;  $^1\text{H}$  NMR (300 MHz,  $\text{CDCl}_3$ ):  $\delta$  7.16-7.20 (m, 1H), 7.28-7.40 (m, 9H), 7.46-7.52 (m, 3H), 7.59 (t,  $J = 10.8$  Hz, 1H), 7.97 (d,  $J = 6.6$  Hz, 2H), 8.28 (d,  $J = 7.8$  Hz, 1H) ppm.;  $^{13}\text{C}\{^1\text{H}\}$  NMR (101 MHz,  $\text{CDCl}_3$ ):  $\delta$  124.2, 125.7, 128.4, 131.1, 131.9, 132.1, 132.5, 133.3, 133.4, 133.5, 134.5, 134.9, 135.0, 136.8, 138.7, 139.1, 139.7, 141.5, 142.2, 143.2, 143.5, 166.0 ppm.; HRMS (ESI-TOF): Calcd

for  $[\text{C}_{28}\text{H}_{18}\text{O}_2\text{N}_2\text{ClS}]^+ m/z$  481.0778. Found 481.0811.

**1-(4-((4-bromophenyl)thio)phenyl)-3-(p-tolyl)isochromeno[4,3-c]pyrazol-5(1H)-one (4l):**

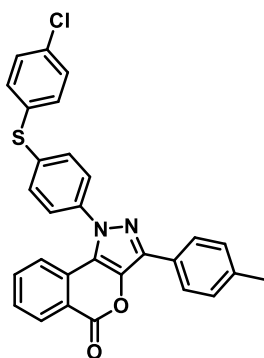

The compound was purified by column chromatography as white solid (415 mg, 77% yield) using 7% ethylacetate in hexane; m.p. 213°C;  $^1\text{H}$  NMR (400 MHz,  $\text{DMSO}-d_6$ ):  $\delta$  2.36 (s, 3H), 7.20 (d,  $J = 8.0$  Hz, 1H), 7.34 (d,  $J = 8.0$  Hz, 2H), 7.45 (d,  $J = 8.0$  Hz, 2H), 7.54 (d,  $J = 8.0$  Hz, 2H), 7.68 (t,  $J = 9.6$  Hz, 5H), 7.80 (t,  $J = 8.0$  Hz, 1H), 7.90 (d,  $J = 8.0$  Hz, 2H), 8.32 (d,  $J = 8.4$  Hz, 1H) ppm.;  $^{13}\text{C}\{^1\text{H}\}$  NMR (101 MHz,  $\text{DMSO}-d_6$ ):  $\delta$  21.4, 119.6, 121.2, 122.0, 124.0, 126.1, 127.6, 127.8, 128.1, 129.5, 129.9, 131.2, 131.9, 133.2, 133.4, 134.2, 135.8, 136.5,

136.8, 137.4, 138.5, 139.1, 161.0 ppm.; HRMS (ESI-TOF): Calcd for  $[\text{C}_{29}\text{H}_{20}\text{O}_2\text{N}_2\text{BrS}]^+ m/z$  539.0430. Found 539.0471.

**1-(4-((4-chlorophenyl)thio)phenyl)-3-(4-methoxyphenyl)isochromeno[4,3-c]pyrazol-5(1H)-one (4m):**

The compound was purified by column chromatography as white solid (419 mg, 82% yield) using 7% ethylacetate in hexane; m.p. 187°C; <sup>1</sup>H NMR (400 MHz, CDCl<sub>3</sub>): δ 3.85 (s, 3H), 6.97 (d, *J* = 8.4 Hz, 2H), 7.26 (d, *J* = 8.0 Hz, 1H), 7.38 (d, *J* = 8.4 Hz, 2H), 7.43-

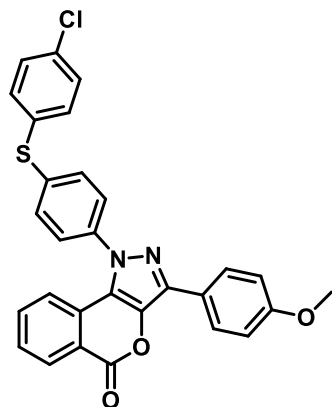

7.45 (m, 3H), 7.48-7.61 (m, 5H), 8.06 (d, *J* = 8.4 Hz, 2H), 8.40 (d, *J* = 7.6 Hz, 1H) ppm.; <sup>13</sup>C{<sup>1</sup>H}NMR (101 MHz, CDCl<sub>3</sub>): δ 55.3, 114.1, 119.6, 120.9, 122.7, 123.5, 127.3, 127.8, 127.9, 128.5, 129.8, 130.4, 132.1, 132.2, 133.8, 134.4, 134.6, 136.6, 137.7, 138.4, 138.7, 159.8, 161.3 ppm.; <sup>13</sup>C{<sup>1</sup>H} DEPT- 135 NMR (101 MHz, CDCl<sub>3</sub>): δ 55.3, 114.1, 120.9, 127.2, 127.8, 128.5, 129.8, 130.4, 132.1, 133.8, 134.6 ppm.; HRMS (ESI-TOF): Calcd for [C<sub>29</sub>H<sub>20</sub>O<sub>3</sub>N<sub>2</sub>ClS]<sup>+</sup> *m/z* 511.0884. Found 511.0942.

**3-(4-bromophenyl)-1-(4-((4-chlorophenyl)thio)phenyl)isochromeno[4,3-c]pyrazol-5(1H)-one (4n):**

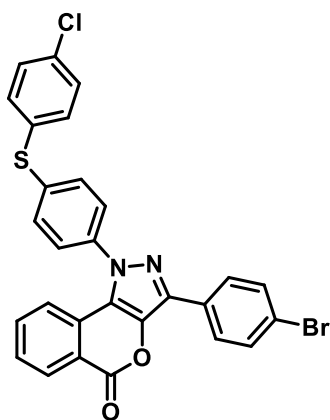

The compound was purified by column chromatography as white solid (498 mg, 89% yield) using 7% ethylacetate in hexane; m.p. 233°C; <sup>1</sup>H NMR (400 MHz, DMSO-d<sub>6</sub>): δ 7.16 (d, *J* = 8.0 Hz, 1H), 7.44-7.59 (m, 8H), 7.66 (d, *J* = 8.0 Hz, 3H), 7.78 (t, *J* = 7.2 Hz, 1H), 7.98 (d, *J* = 8.4 Hz, 2H), 8.30 (d, *J* = 8.0 Hz, 1H) ppm.; <sup>13</sup>C{<sup>1</sup>H}NMR (101 MHz, DMSO-d<sub>6</sub>): δ 121.2, 124.2, 124.3, 127.7, 127.90, 127.97, 128.0, 129.1, 129.5, 129.6, 129.7, 130.40, 130.49, 132.0, 133.0, 133.6, 135.9, 136.5, 138.4, 139.0, 157.5, 161.0 ppm.; HRMS (ESI-TOF): Calcd for [C<sub>28</sub>H<sub>17</sub>O<sub>2</sub>N<sub>2</sub>BrClS]<sup>+</sup> *m/z* 578.9883. Found 578.9951.

**3-(4-chlorophenyl)-1-(4-((4-chlorophenyl)thio)phenyl)isochromeno[4,3-c]pyrazol-5(1H)-one (4o):**

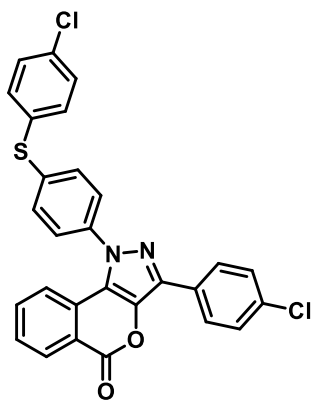

The compound was purified by column chromatography as white solid (438 mg, 85% yield) using 7% ethylacetate in hexane; m.p. 177°C; <sup>1</sup>H NMR (400 MHz, CDCl<sub>3</sub>): δ 7.27 (d, *J* = 6.4 Hz, 1H), 7.40 (d, *J* = 8.4 Hz, 2H), 7.45-7.48 (m, 5H), 7.53-7.58 (m, 3H), 7.64 (t, *J* = 8.4 Hz, 2H), 8.10 (d, *J* = 8.4 Hz, 2H), 8.46 (d, *J* = 7.6 Hz, 1H) ppm.; <sup>13</sup>C{<sup>1</sup>H}NMR (101 MHz, CDCl<sub>3</sub>): δ 119.7, 121.0, 123.8, 127.2, 127.7, 127.8, 128.7, 128.8, 128.9, 129.9, 130.2, 131.9, 132.3, 134.1, 134.4, 134.7, 134.8, 136.7, 136.8, 138.4, 139.1, 161.2 ppm.; HRMS (ESI-TOF): Calcd for [C<sub>28</sub>H<sub>17</sub>O<sub>2</sub>N<sub>2</sub>Cl<sub>2</sub>S]<sup>+</sup> *m/z* 515.0389. Found 515.0424.

### 3-(4-methoxyphenyl)-1-(4-(p-tolylthio)phenyl)isochromeno[4,3-c]pyrazol-5(1H)-one

**(4p):** The compound was purified by column chromatography as white solid (382 mg, 78% yield) using 7% ethylacetate in hexane; m.p. 203°C; <sup>1</sup>H NMR (400 MHz, CDCl<sub>3</sub>): δ 2.42 (s,

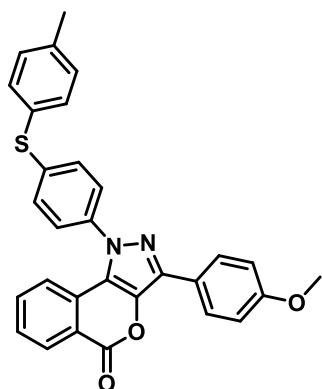

3H), 3.88 (s, 3H), 7.01 (d, *J* = 8.0 Hz, 2H), 7.27 (t, *J* = 9.2 Hz, 3H), 7.38 (d, *J* = 8.0 Hz, 2H), 7.46-7.56 (m, 5H), 7.62 (t, *J* = 9.2 Hz, 1H), 8.10 (d, *J* = 8.4 Hz, 2H), 8.46 (d, *J* = 8.0 Hz, 1H)ppm.; <sup>13</sup>C{<sup>1</sup>H}NMR (101 MHz, CDCl<sub>3</sub>): δ 20.7, 55.3, 114.1, 119.7, 121.0, 122.9, 123.6, 127.1, 127.9, 128.0, 128.5, 129.03, 129.06, 130.5, 132.2, 133.8, 134.7, 136.5, 137.6, 137.9, 139.0, 140.6, 159.8, 161.5 ppm.; HRMS (ESI-TOF): Calcd for [C<sub>30</sub>H<sub>23</sub>O<sub>3</sub>N<sub>2</sub>S]<sup>+</sup> *m/z* 491.1351. Found 491.1384.

### 1-(4-((4-fluorophenyl)thio)phenyl)-3-(4-methoxyphenyl)isochromeno[4,3-c]pyrazol-5(1H)-one (4q):

The compound was purified by column chromatography as white solid (425 mg, 86% yield) using 7% ethylacetate in hexane; m.p. 189°C; <sup>1</sup>H NMR (400 MHz, CDCl<sub>3</sub>): δ

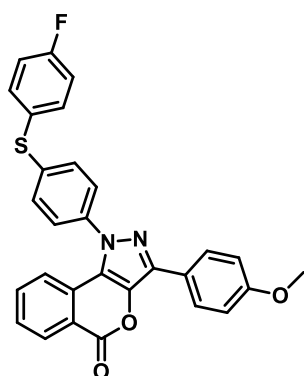

3.87 (s, 3H), 6.99-7.06 (m, 2H), 7.14 (t, *J* = 8.8 Hz, 2H), 7.28 (t, *J* = 16.4 Hz, 2H), 7.39 (d, *J* = 8.8 Hz, 2H), 7.50-7.61 (m, 5H), 8.09 (d, *J* = 6.4 Hz, 2H), 8.45 (d, *J* = 8.0 Hz, 1H) ppm.; <sup>13</sup>C{<sup>1</sup>H}NMR (101 MHz, CDCl<sub>3</sub>): δ 55.3, 114.1, 116.6 (d, <sup>2</sup>*J*<sub>C-F</sub> = 22.2 Hz), 117.0, 119.7, 120.9, 122.8, 123.5, 127.2, 127.8, 128.6 (d, <sup>3</sup>*J*<sub>C-F</sub> = 8.7 Hz), 129.2, 131.2, 132.2, 134.7, 135.8, 136.6, 137.7, 138.2, 139.9, 159.8, 161.4, 163.0 (d, <sup>1</sup>*J*<sub>C-F</sub> = 250.2 Hz) ppm.; <sup>19</sup>F{<sup>13</sup>C}NMR (377 MHz, CDCl<sub>3</sub>): δ 111.8 ppm.; HRMS

(ESI-TOF): Calcd for [C<sub>29</sub>H<sub>20</sub>O<sub>3</sub>N<sub>2</sub>FS]<sup>+</sup> *m/z* 495.1179. Found 495.1239.

### 1-(4-(phenylselanyl)phenyl)-3-(p-tolyl)isochromeno[4,3-c]pyrazol-5(1H)-one (4r):

The compound was purified by column chromatography as white solid (406 mg, 80% yield) using 7% ethylacetate in hexane; m.p. 220°C;

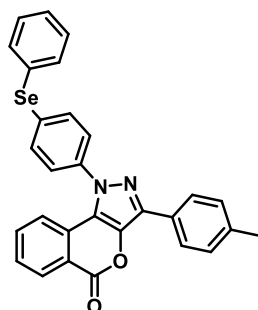

<sup>1</sup>H NMR (400 MHz, CDCl<sub>3</sub>): δ 2.42 (s, 3H), 7.29 (t, *J* = 7.6 Hz, 3H), 7.39-7.47 (m, 5H), 7.52-7.57 (m, 5H), 7.63 (t, *J* = 7.6 Hz, 1H), 8.07 (d, *J* = 7.6 Hz, 2H), 8.47 (d, *J* = 7.6 Hz, 1H) ppm.; <sup>13</sup>C{<sup>1</sup>H}NMR (101 MHz, CDCl<sub>3</sub>): δ 21.4, 119.7, 121.0, 123.6,

126.4, 127.2, 127.3, 128.0, 128.4, 128.6, 129.4, 129.6, 130.1, 132.2, 132.9, 133.3, 134.7, 136.8, 137.9, 138.3, 138.5, 139.5, 161.5 ppm.; <sup>13</sup>C{<sup>1</sup>H} DEPT- 135 NMR (101 MHz, CDCl<sub>3</sub>): δ 21.4, 121.0, 126.4, 127.2, 128.4, 128.6, 129.4, 129.6, 130.1, 132.2, 132.9, 134.7 ppm.; HRMS (ESI-TOF): Calcd for [C<sub>29</sub>H<sub>21</sub>O<sub>2</sub>N<sub>2</sub>Se]<sup>+</sup> *m/z* 509.0690. Found 509.0743.

### 3-(4-methoxyphenyl)-1-(4-(phenylselanyl)phenyl)isochromeno[4,3-c]pyrazol-5(1H)-one

(4s): The compound was purified by column chromatography as white solid (429 mg, 82% yield) using 7% ethylacetate in hexane; m.p. 205°C; <sup>1</sup>H NMR (400 MHz, CDCl<sub>3</sub>+ DMSO-d<sub>6</sub>): δ 3.81 (s, 3H), 7.05 (d, *J* = 8.4 Hz, 2H), 7.21-7.53 (m, 9H), 7.73-7.94 (m, 5H), 8.23-8.33 (m, 1H) ppm.; <sup>13</sup>C{<sup>1</sup>H}NMR (101 MHz, CDCl<sub>3</sub>+DMSO-d<sub>6</sub>): δ 55.5, 114.6, 117.7, 119.6, 121.2, 123.0, 123.8, 127.5, 127.7, 128.8, 129.3, 129.8, 130.2, 130.5, 131.9, 132.9, 135.7, 135.8, 138.7, 140.5, 141.6, 159.9, 161.0 ppm.; HRMS (ESI-TOF): Calcd for [C<sub>29</sub>H<sub>21</sub>O<sub>3</sub>N<sub>2</sub>Se]<sup>+</sup> *m/z* 525.0718. Found 525.0757.

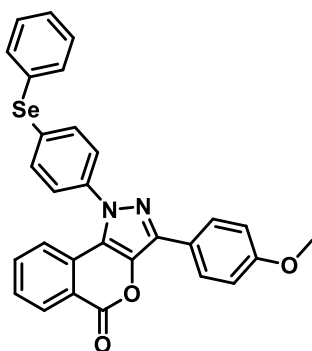

### 3-(4-bromophenyl)-1-(4-(phenylselanyl)phenyl)isochromeno[4,3-c]pyrazol-5(1H)-one

(4t): The compound was purified by column chromatography as white solid (504 mg, 88% yield) using 7% ethylacetate in hexane; m.p. 187°C; <sup>1</sup>H NMR (400 MHz, DMSO-d<sub>6</sub>): δ 7.20 (d, *J* = 8.0 Hz, 1H), 7.41-7.47 (m, 3H), 7.54 (t, *J* = 8.0 Hz, 4H), 7.64-7.72 (m, 5H), 7.81 (d, *J* = 8.0 Hz, 1H), 8.01 (d, *J* = 7.6 Hz, 2H), 8.32 (d, *J* = 8.0 Hz, 1H) ppm.; <sup>13</sup>C{<sup>1</sup>H}NMR (101 MHz, DMSO-d<sub>6</sub>): δ 119.6, 121.3, 122.1, 124.1, 126.3, 127.8, 128.1, 129.1, 129.4, 129.6, 130.3, 130.5, 131.2, 132.0, 133.2, 134.3, 135.9, 136.7, 136.8, 137.6, 139.0, 161.0 ppm.; HRMS (ESI-TOF): Calcd for [C<sub>28</sub>H<sub>18</sub>O<sub>2</sub>N<sub>2</sub>BrSe]<sup>+</sup> *m/z* 572.9718. Found 572.9766.

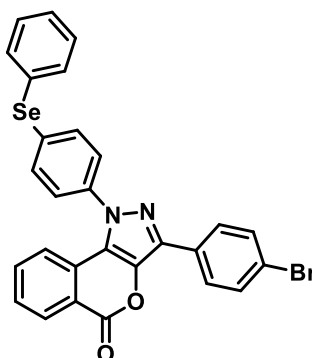

### 3-(4-chlorophenyl)-1-(4-(phenylselanyl)phenyl)isochromeno[4,3-c]pyrazol-5(1H)-one

(4u): The compound was purified by column chromatography as white solid (470 mg, 89% yield) using 7% ethylacetate in hexane; m.p. 178°C; <sup>1</sup>H NMR (400 MHz, CDCl<sub>3</sub>+DMSO-d<sub>6</sub>): δ 7.27-7.31 (m, 1H), 7.36-7.44 (m, 7H), 7.48-7.56 (m, 5H), 7.62 (t, *J* = 7.6 Hz, 1H), 8.08 (d, *J* = 8.4 Hz, 2H), 8.44 (d, *J* = 8.0 Hz, 1H) ppm.; <sup>13</sup>C{<sup>1</sup>H}NMR (101 MHz, CDCl<sub>3</sub>+DMSO-d<sub>6</sub>): δ 119.6, 121.0, 123.8, 127.1, 127.6, 127.8, 128.5, 128.7, 128.8, 128.9, 129.7, 129.8, 130.5, 132.2, 133.1, 134.3, 134.8, 136.6, 136.7, 138.0, 140.0, 161.2 ppm.; HRMS (ESI-TOF): Calcd for [C<sub>28</sub>H<sub>18</sub>O<sub>2</sub>N<sub>2</sub>ClSe]<sup>+</sup> *m/z* 529.0223. Found 529.0268.

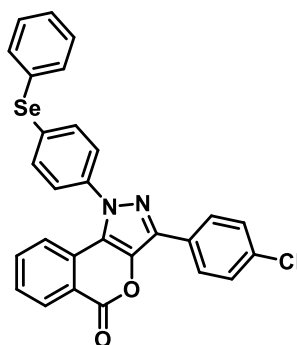

**1-(4-((4-chlorophenyl)selenanyl)phenyl)-3-phenylisochromeno[4,3-c]pyrazol-5(1H)-one**

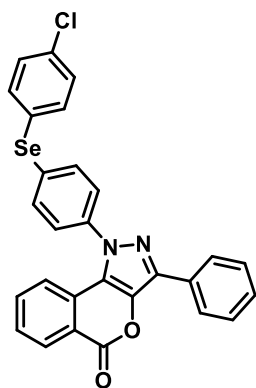

**(4v):** The compound was purified by column chromatography as white solid (459 mg, 87% yield) using 10% ethylacetate in hexane; m.p. 170°C;  $^1\text{H}$  NMR (400 MHz,  $\text{CDCl}_3$ ):  $\delta$  7.28 (d,  $J = 8.0$  Hz, 1H), 7.38-7.41 (m, 3H), 7.45-7.51 (m, 6H), 7.54-7.57 (m, 3H), 7.62 (t,  $J = 8.0$  Hz, 1H), 8.16 (d,  $J = 7.6$  Hz, 1H), 8.46 (d,  $J = 7.6$  Hz, 1H) ppm;  $^{13}\text{C}\{^1\text{H}\}$  NMR (101 MHz,  $\text{CDCl}_3$ ):  $\delta$  119.7, 120.9, 123.7, 126.5, 127.3, 127.9, 128.6, 128.71, 128.77, 129.8, 130.1, 130.3, 132.0, 132.3, 133.9, 134.5, 134.7, 137.0, 137.8, 138.6, 138.8, 161.3

ppm; HRMS (ESI-TOF): Calcd for  $[\text{C}_{28}\text{H}_{18}\text{O}_2\text{N}_2\text{ClSe}]^+ m/z$  529.0223. Found 529.0211.

# $^1\text{H}$ and $^{13}\text{C}$ NMR Spectra of compounds 3a-ab:

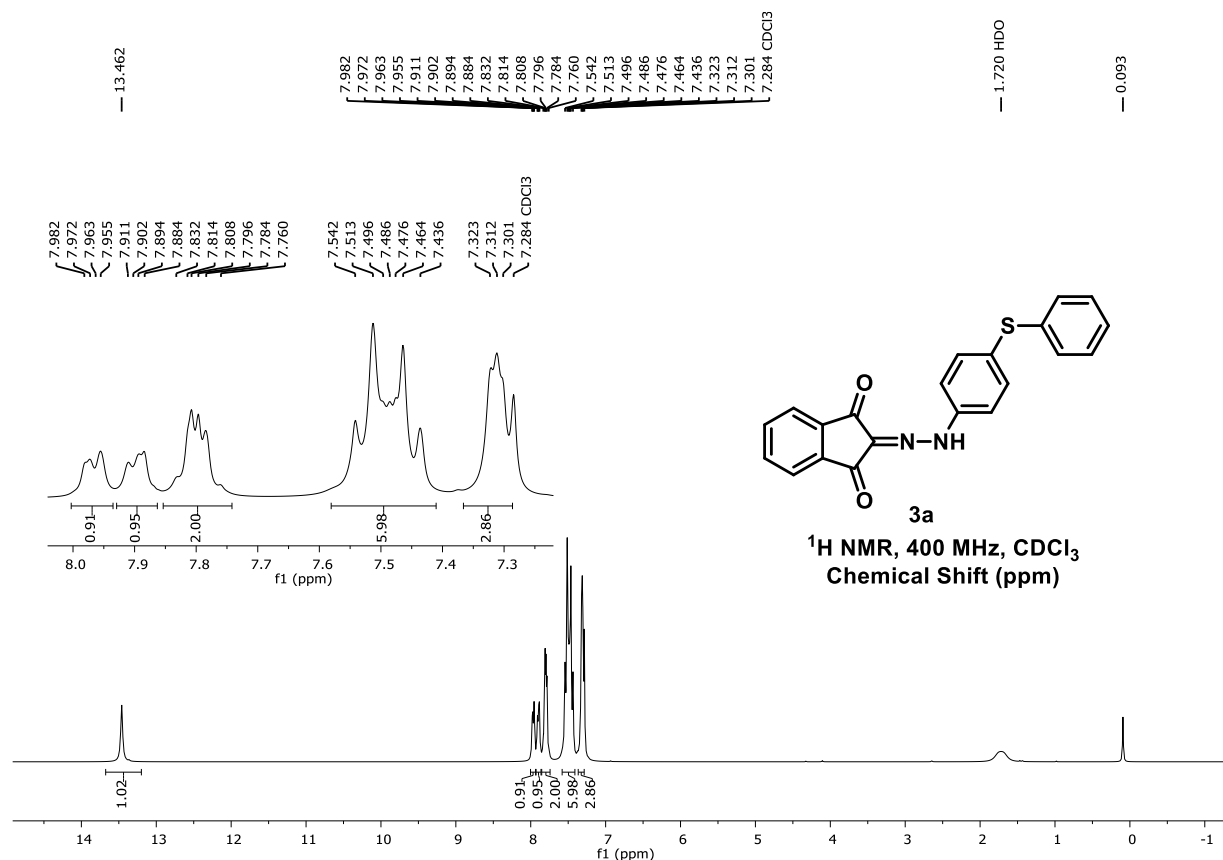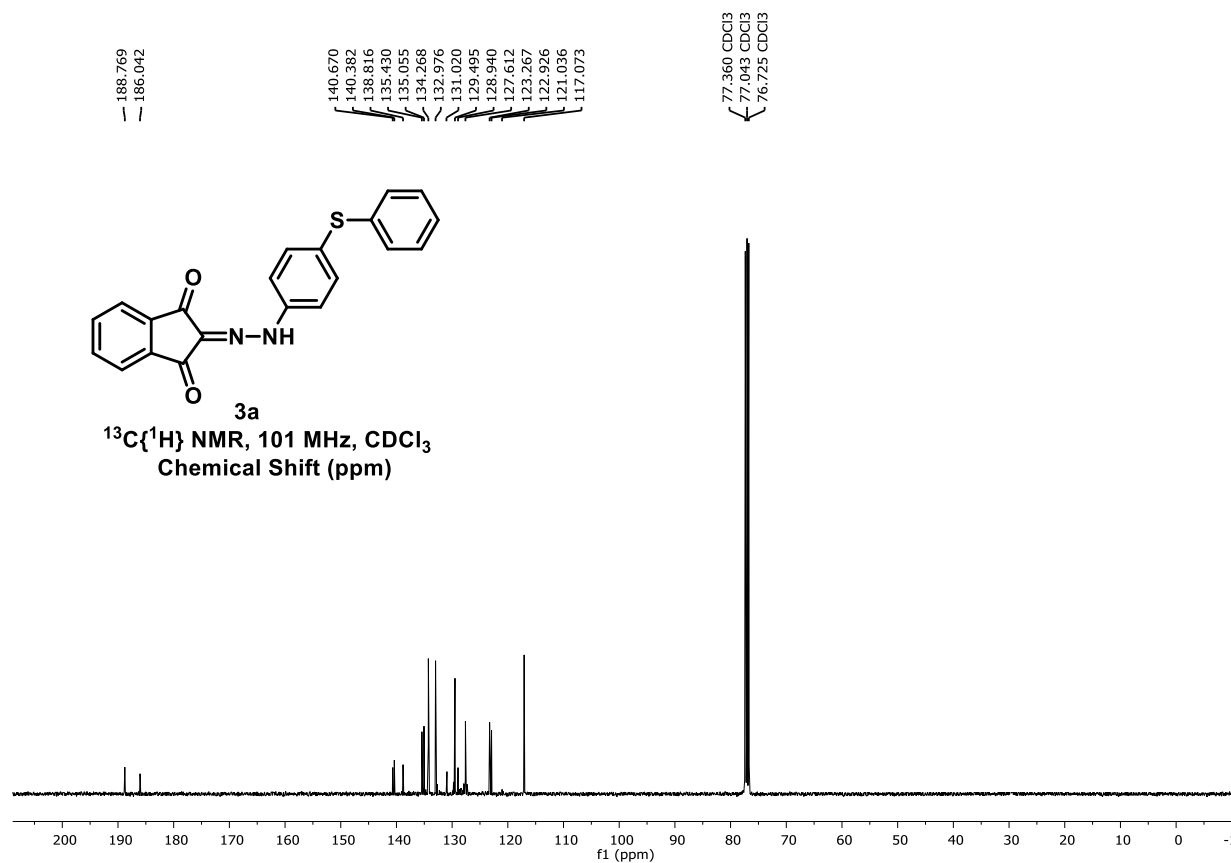



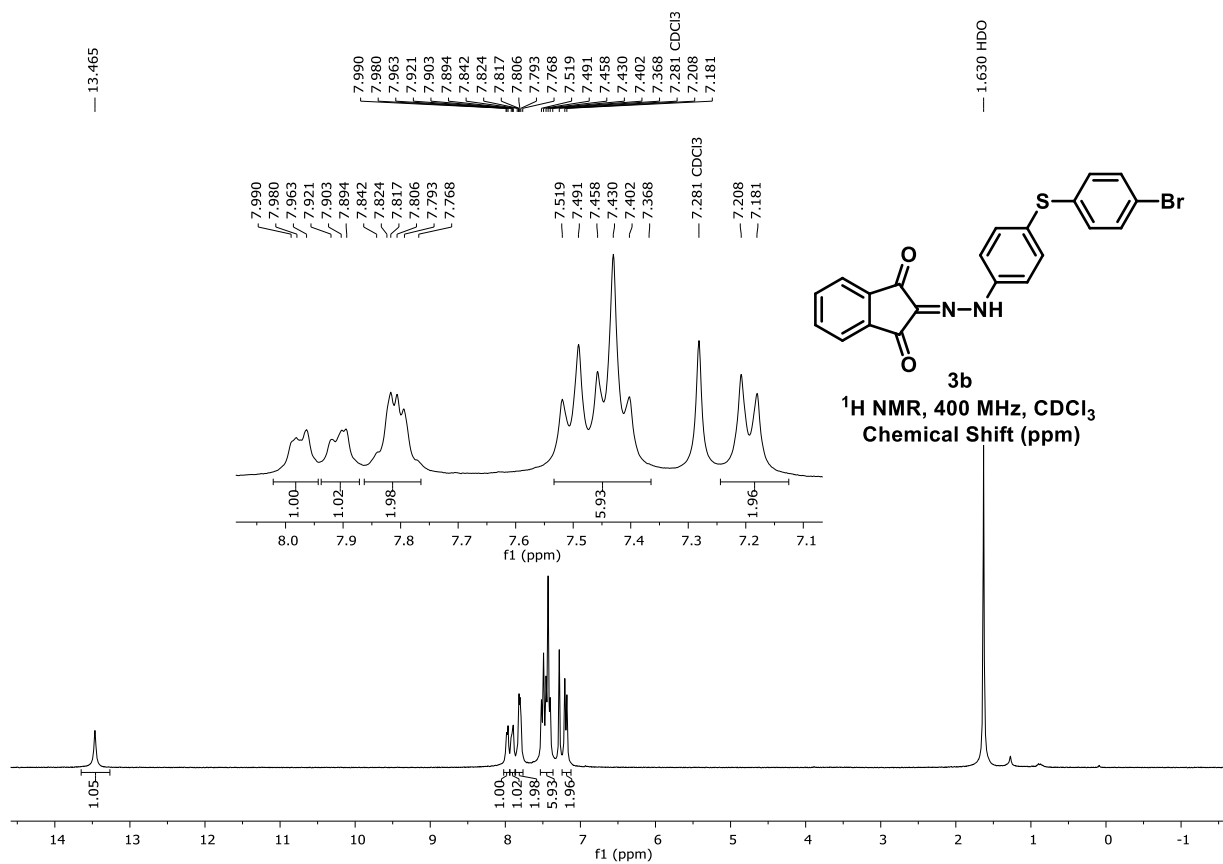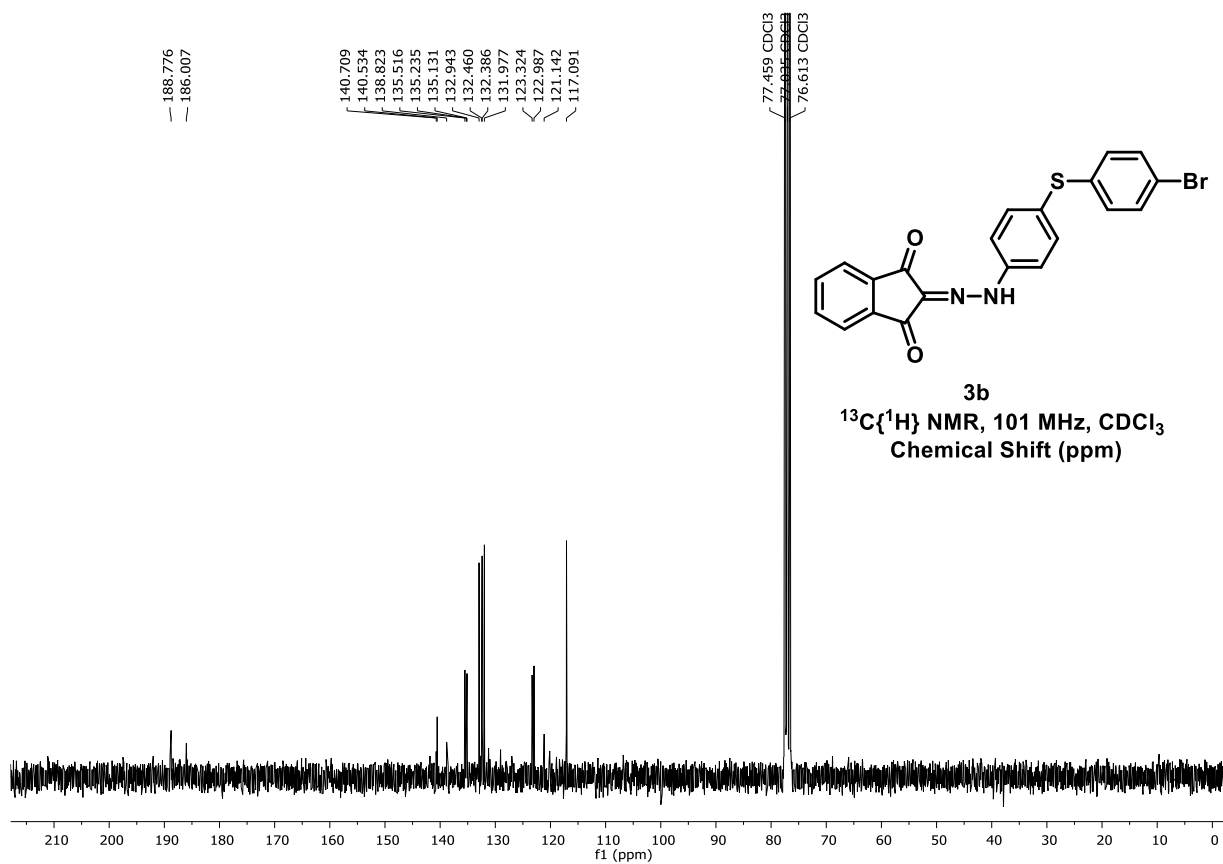

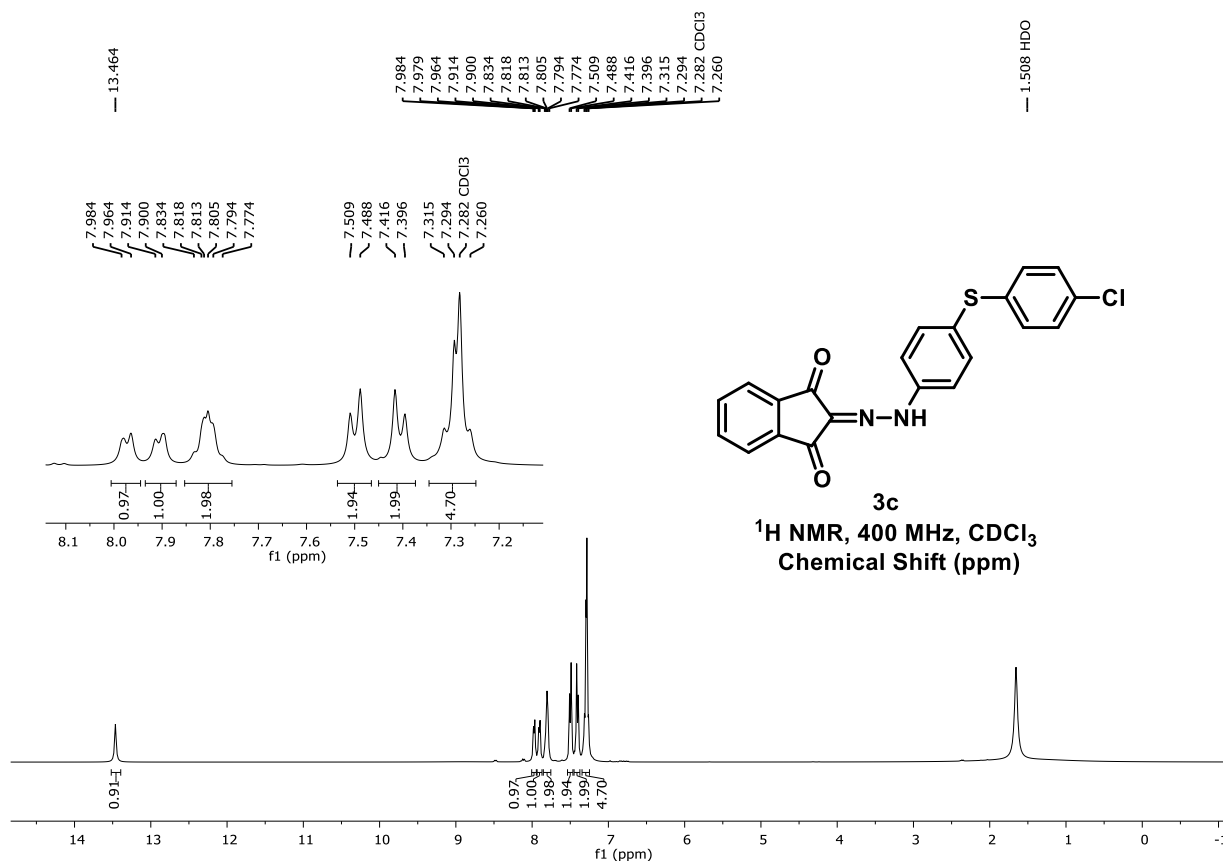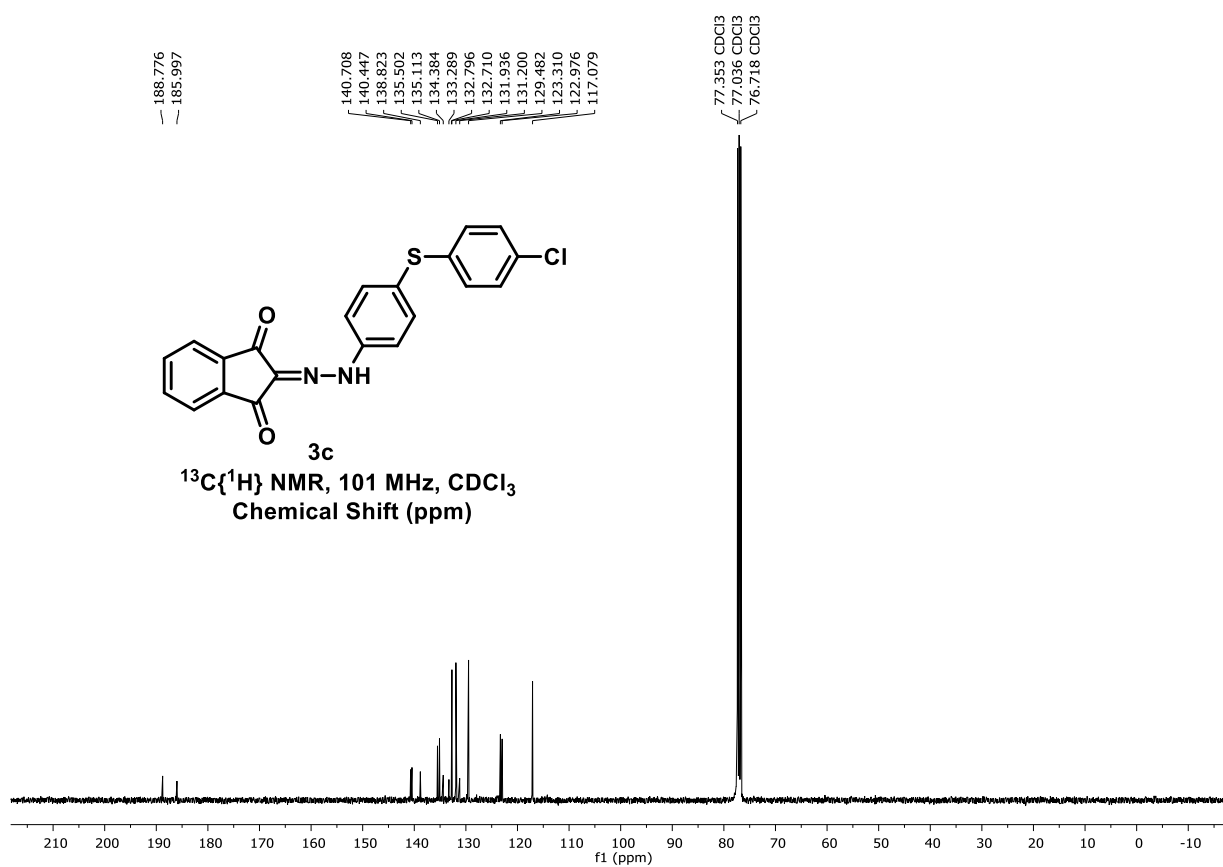

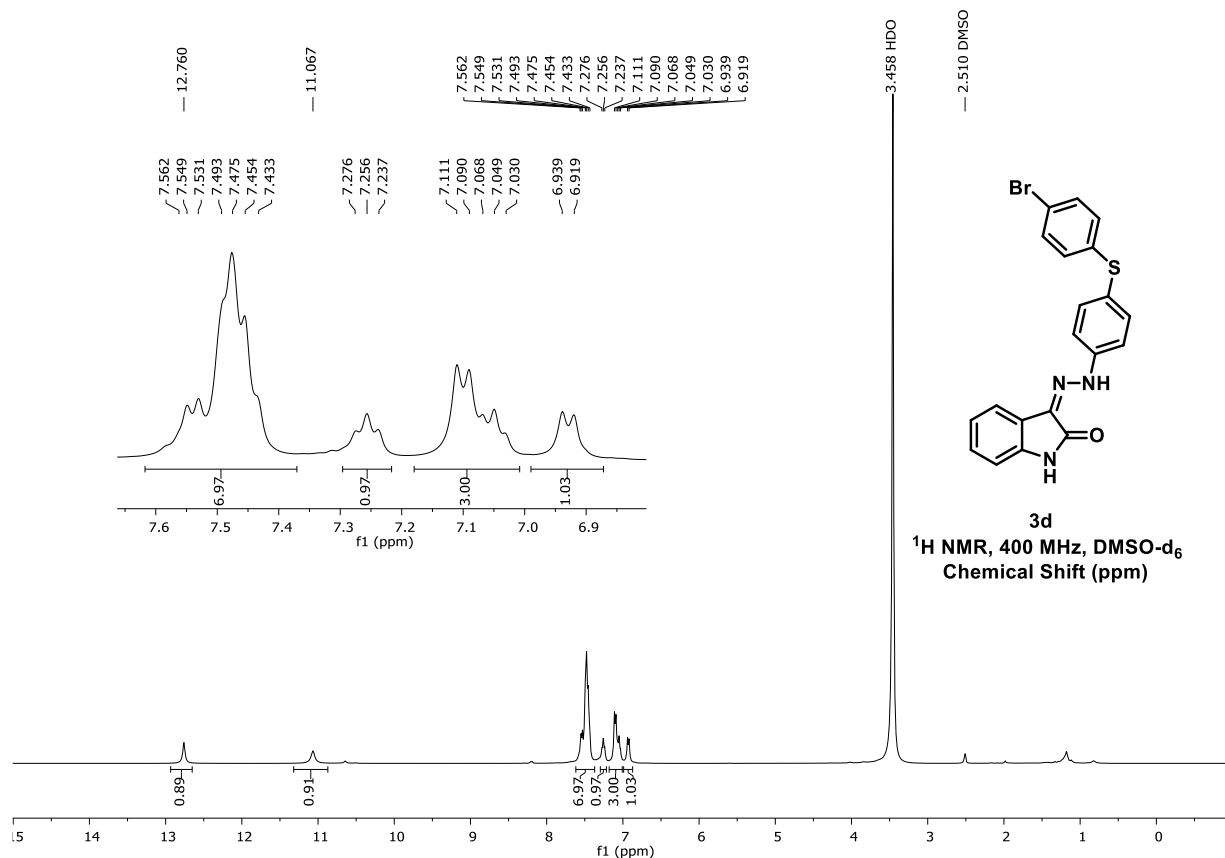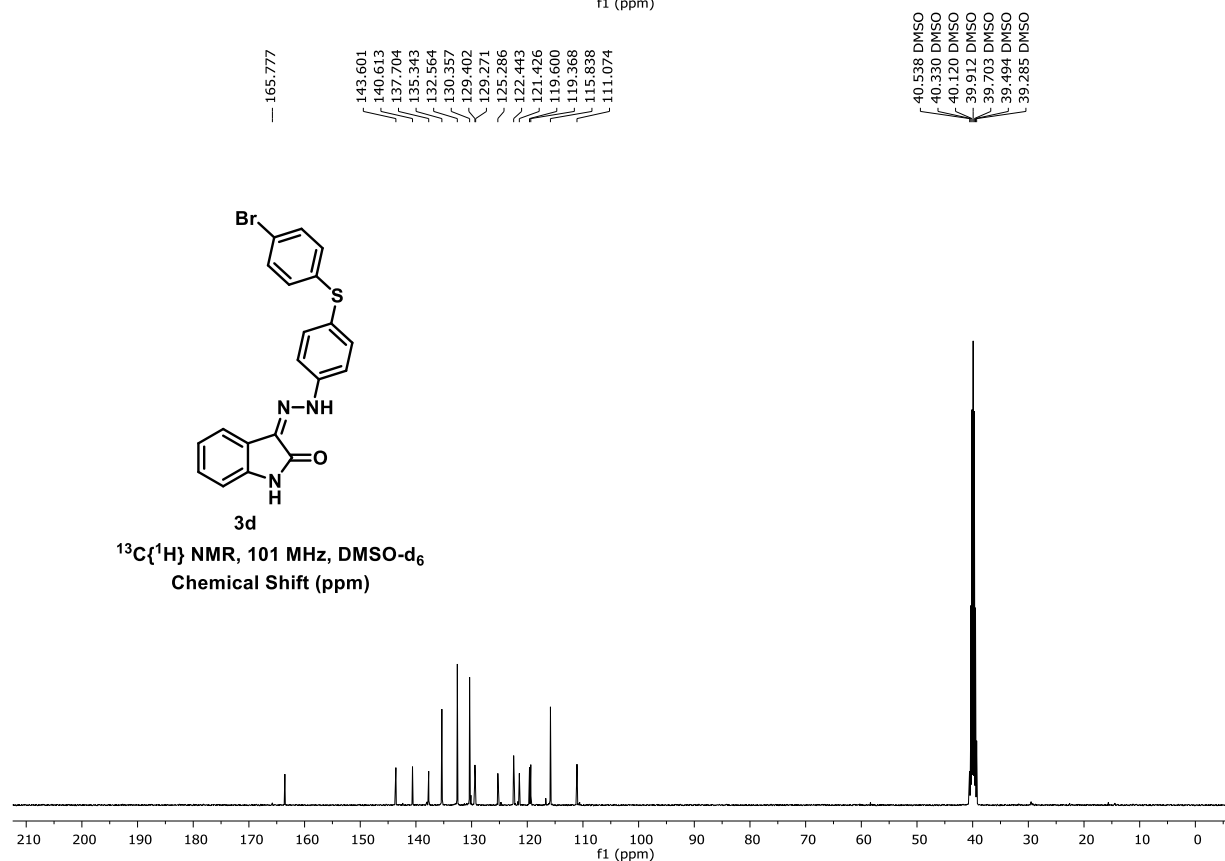

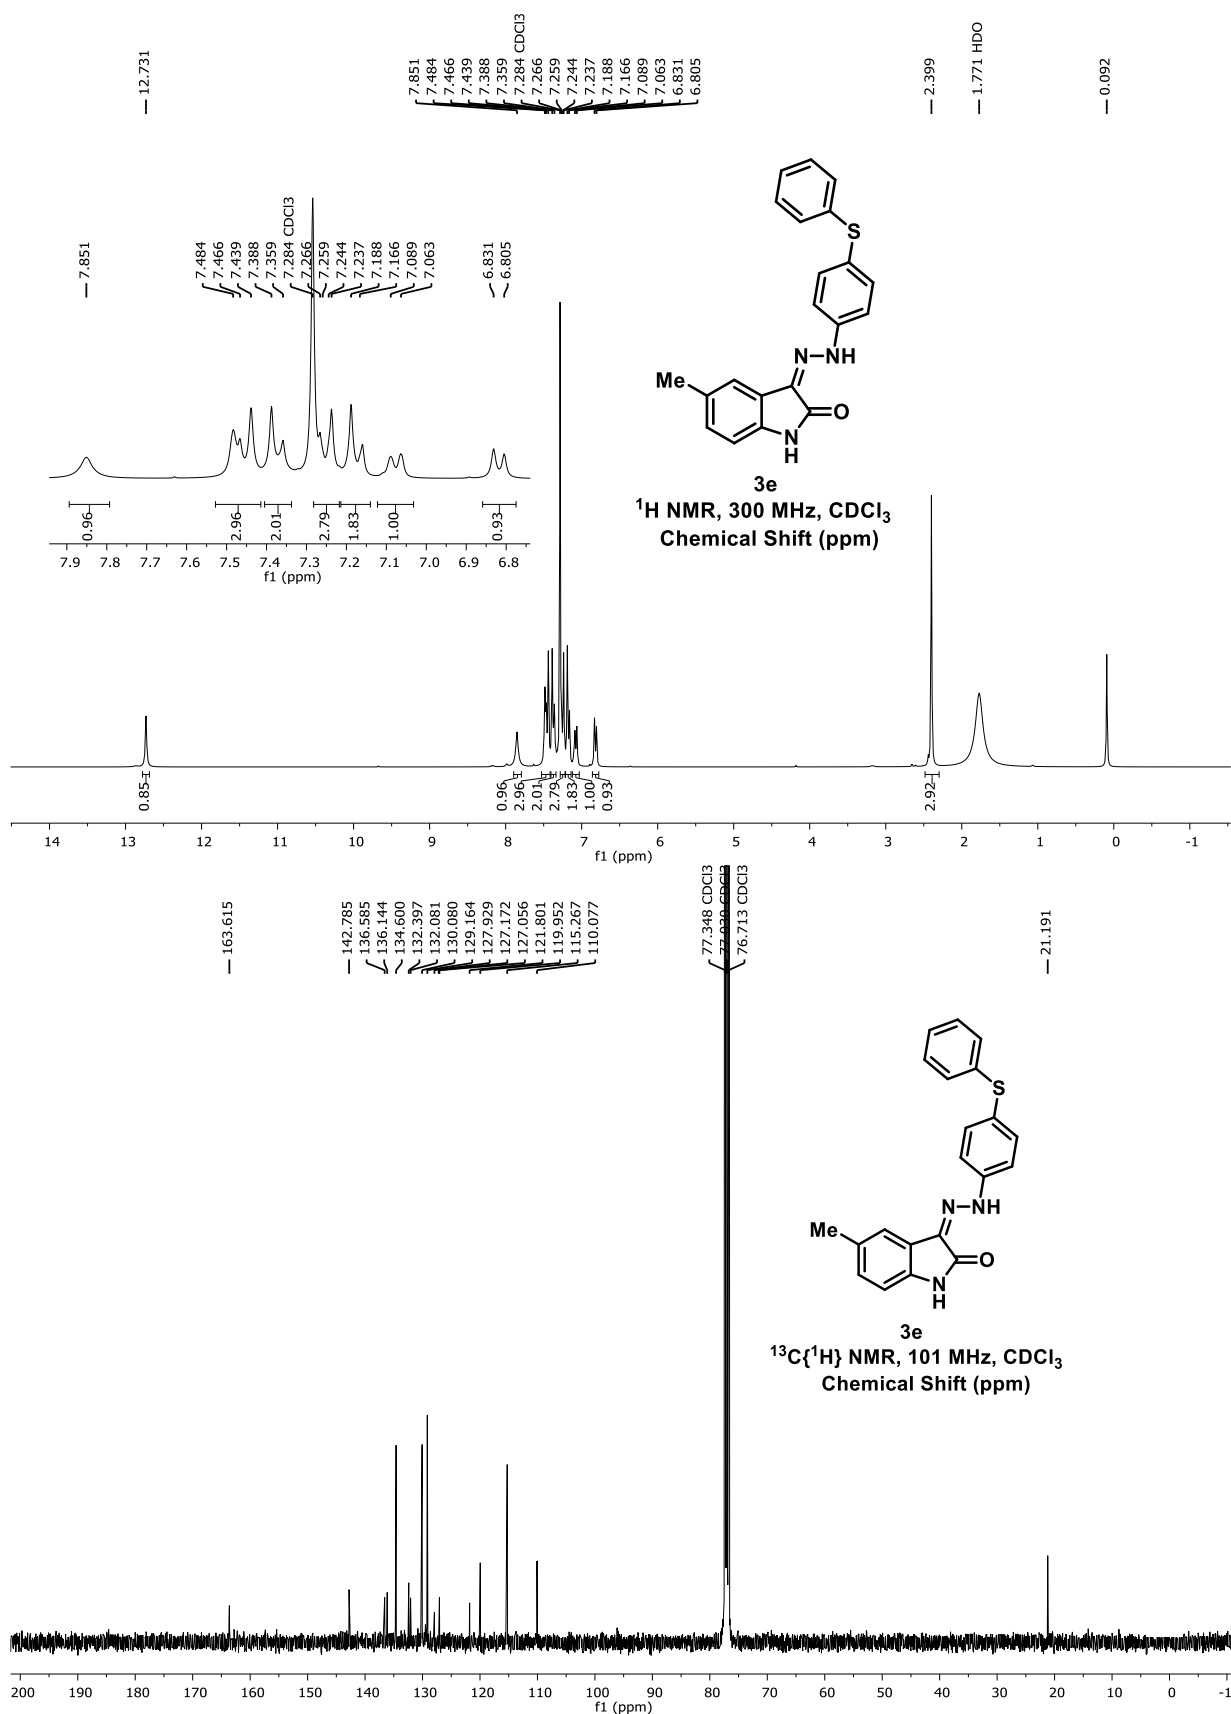

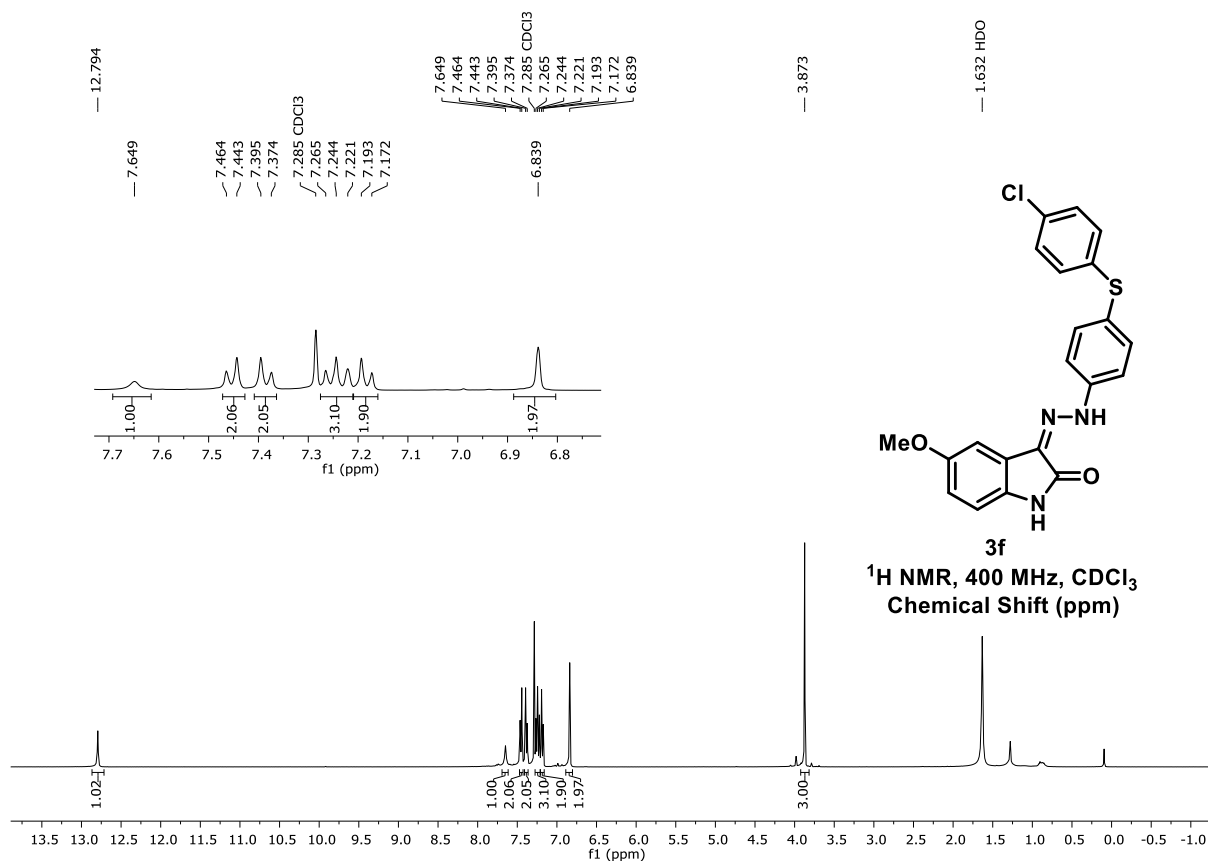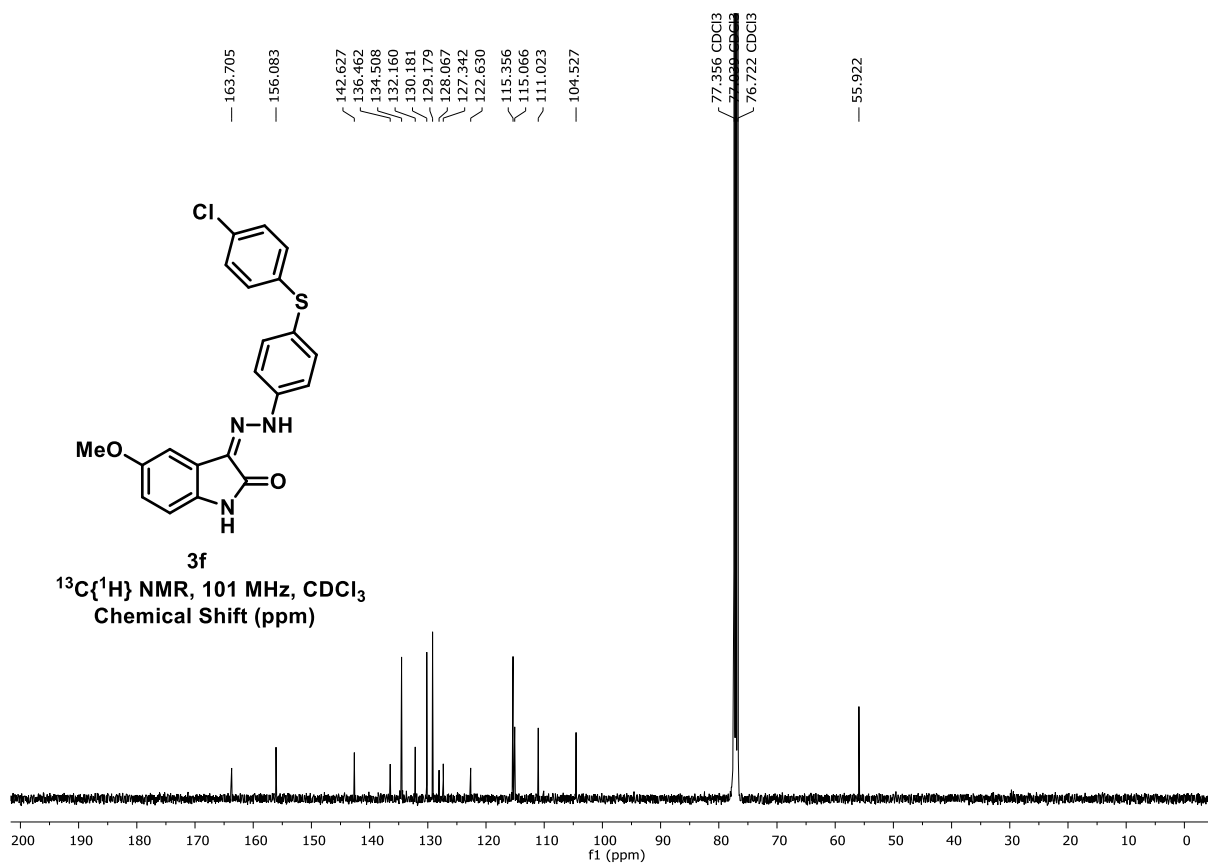

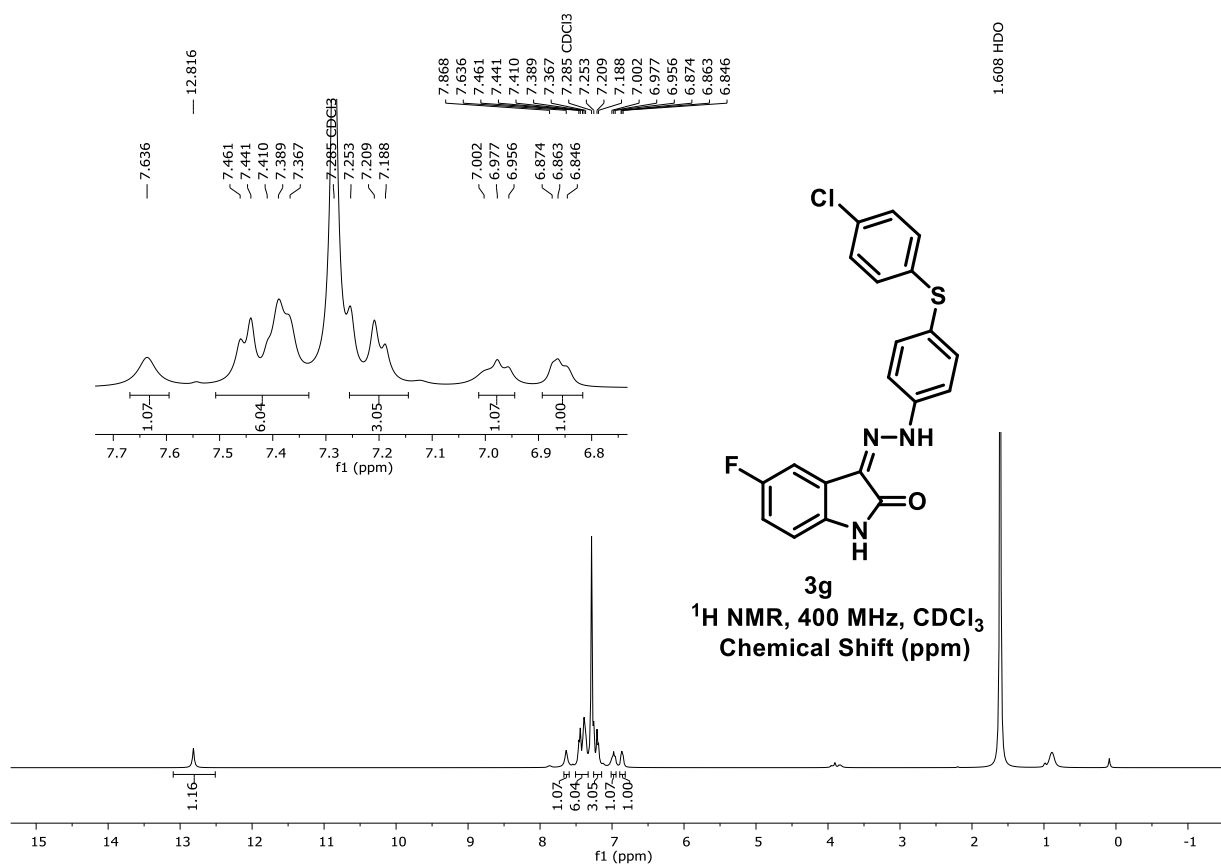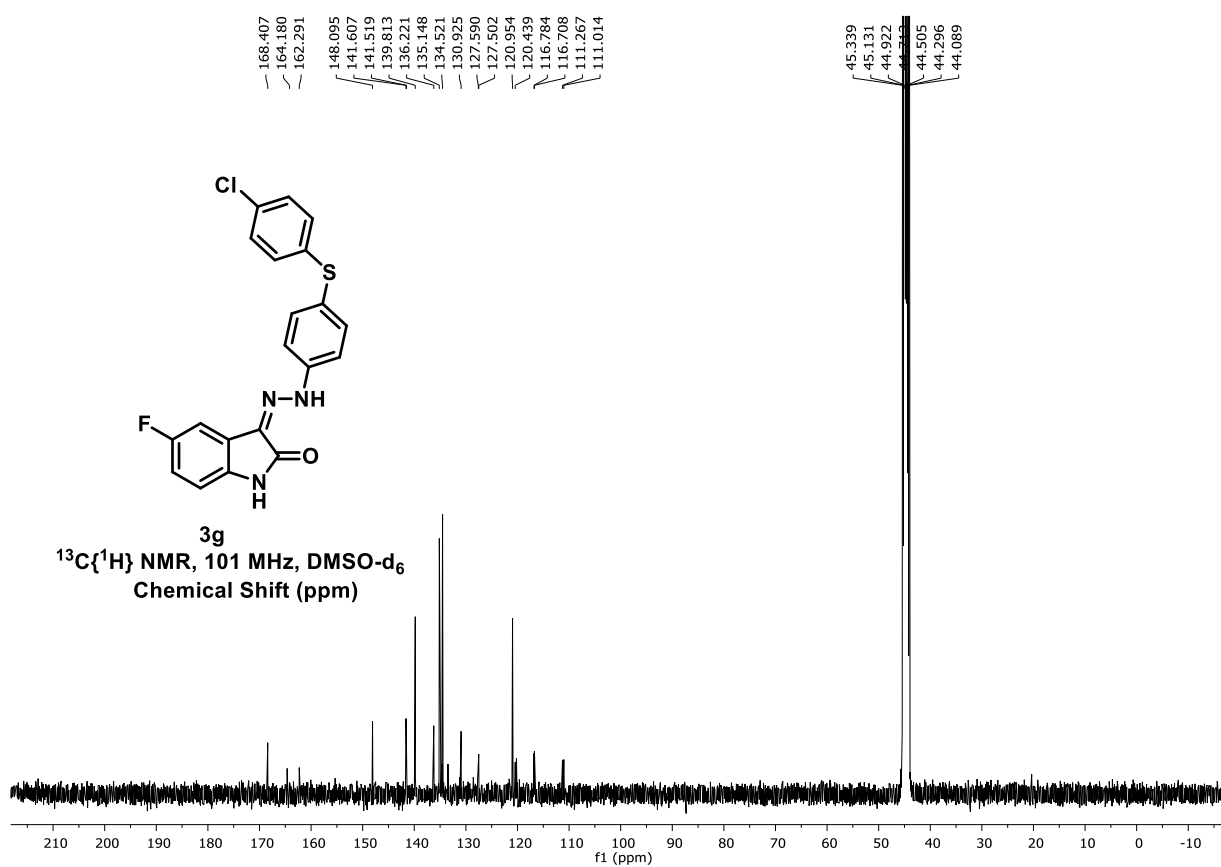

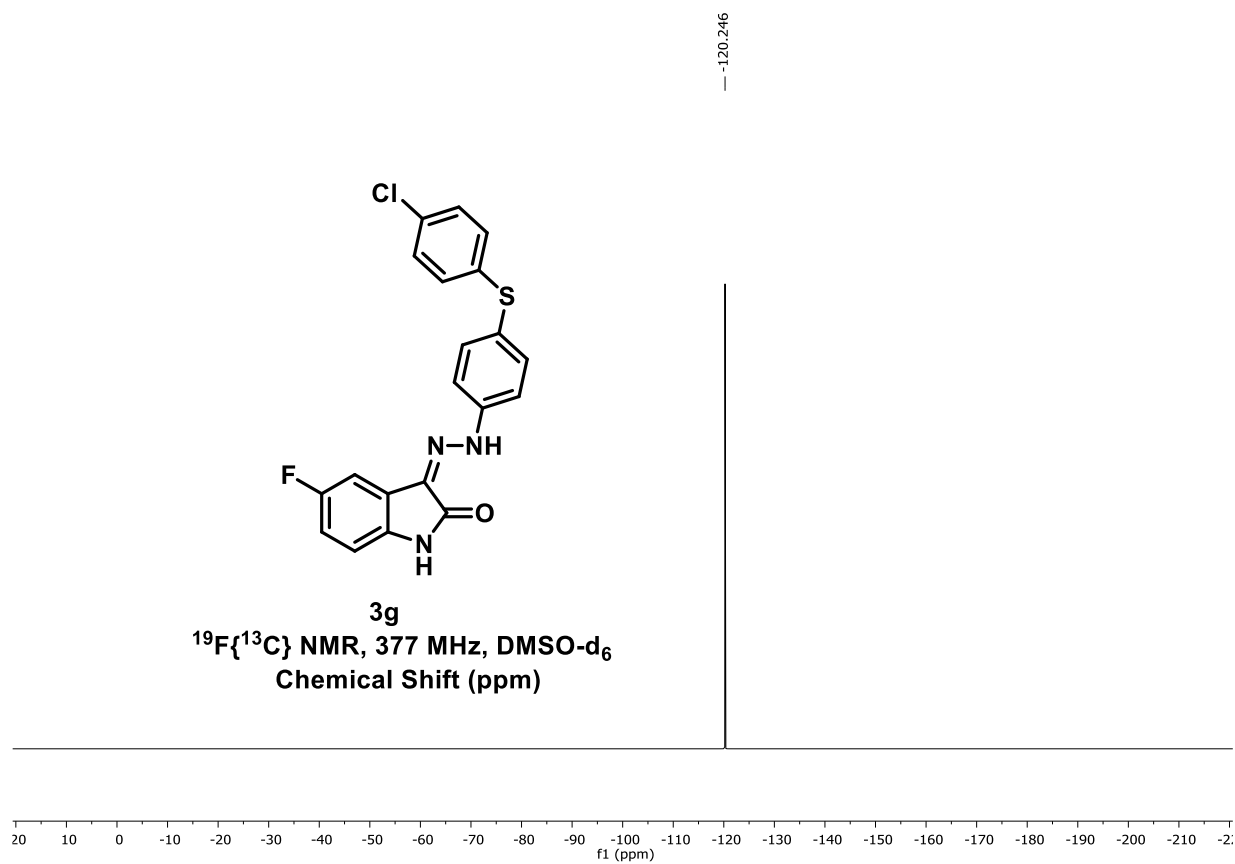

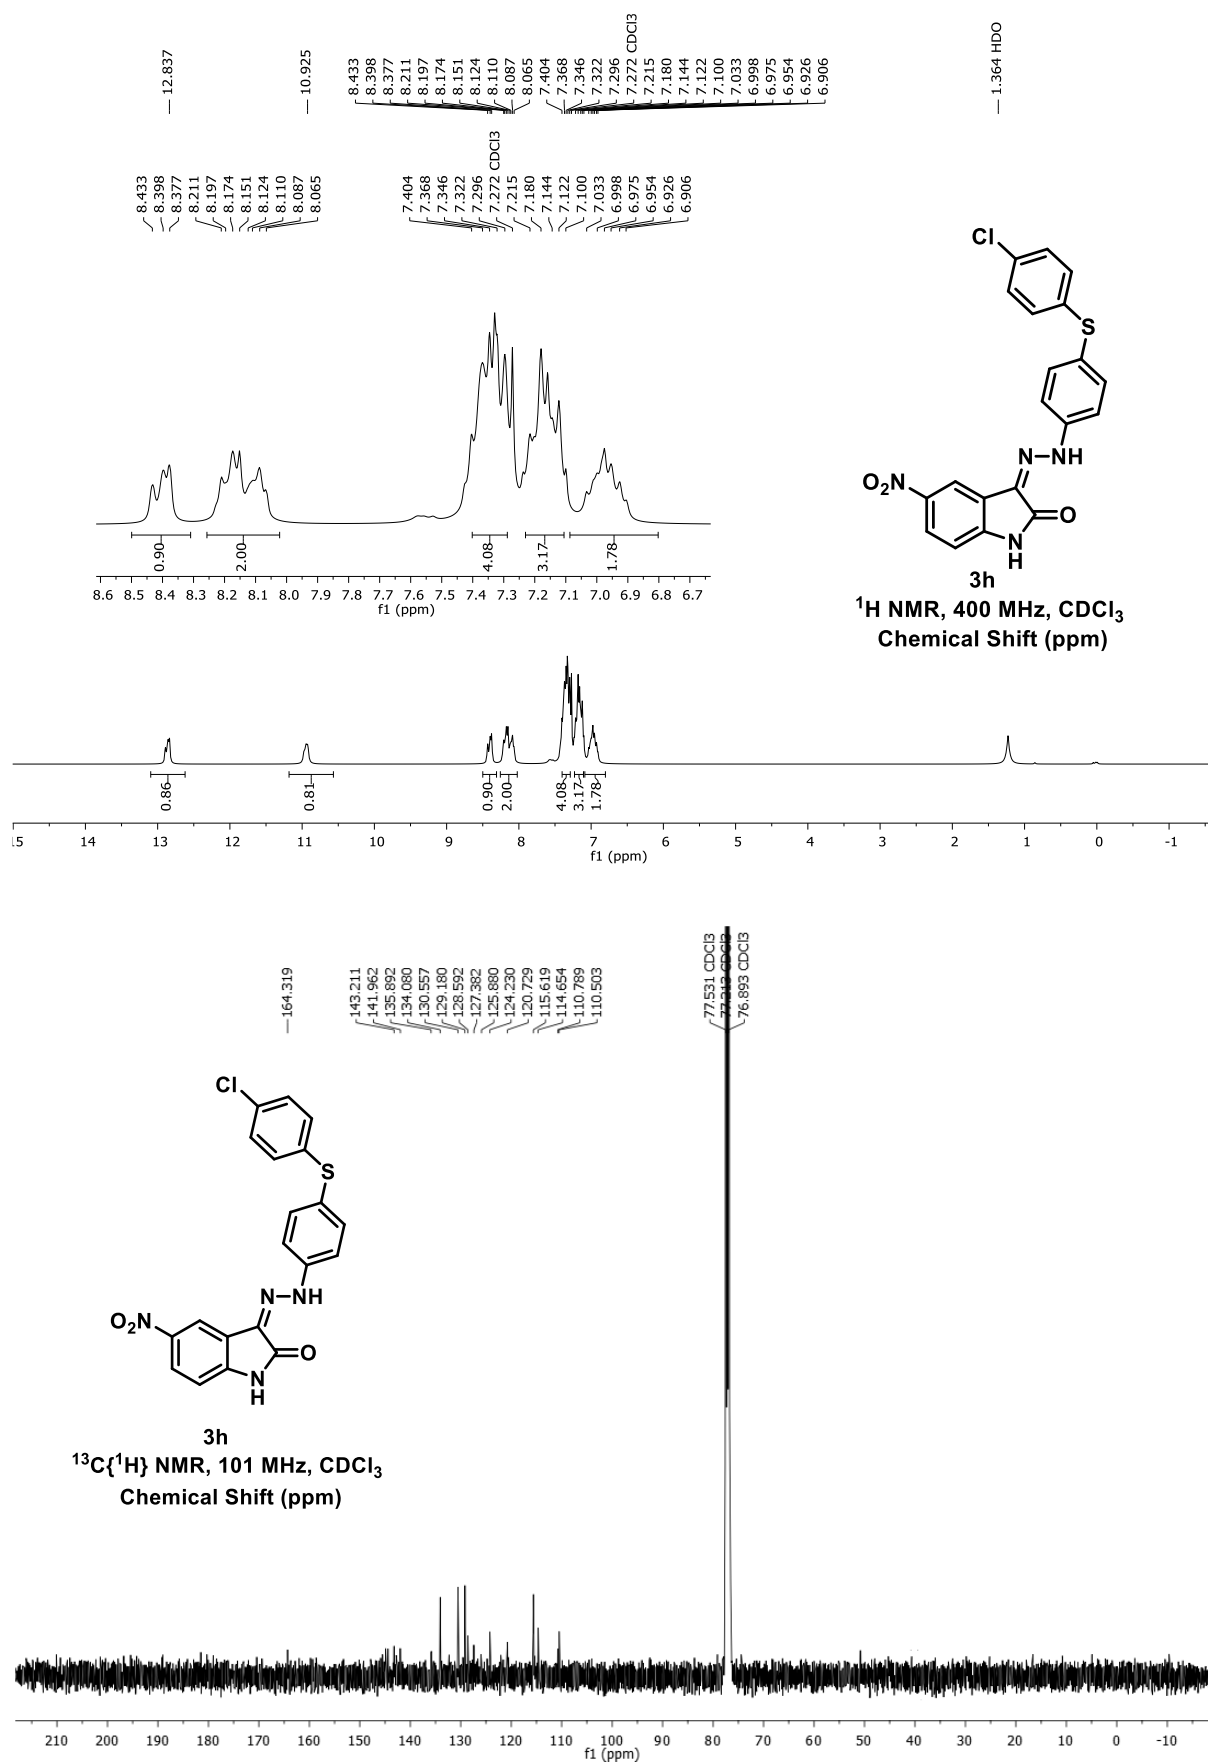



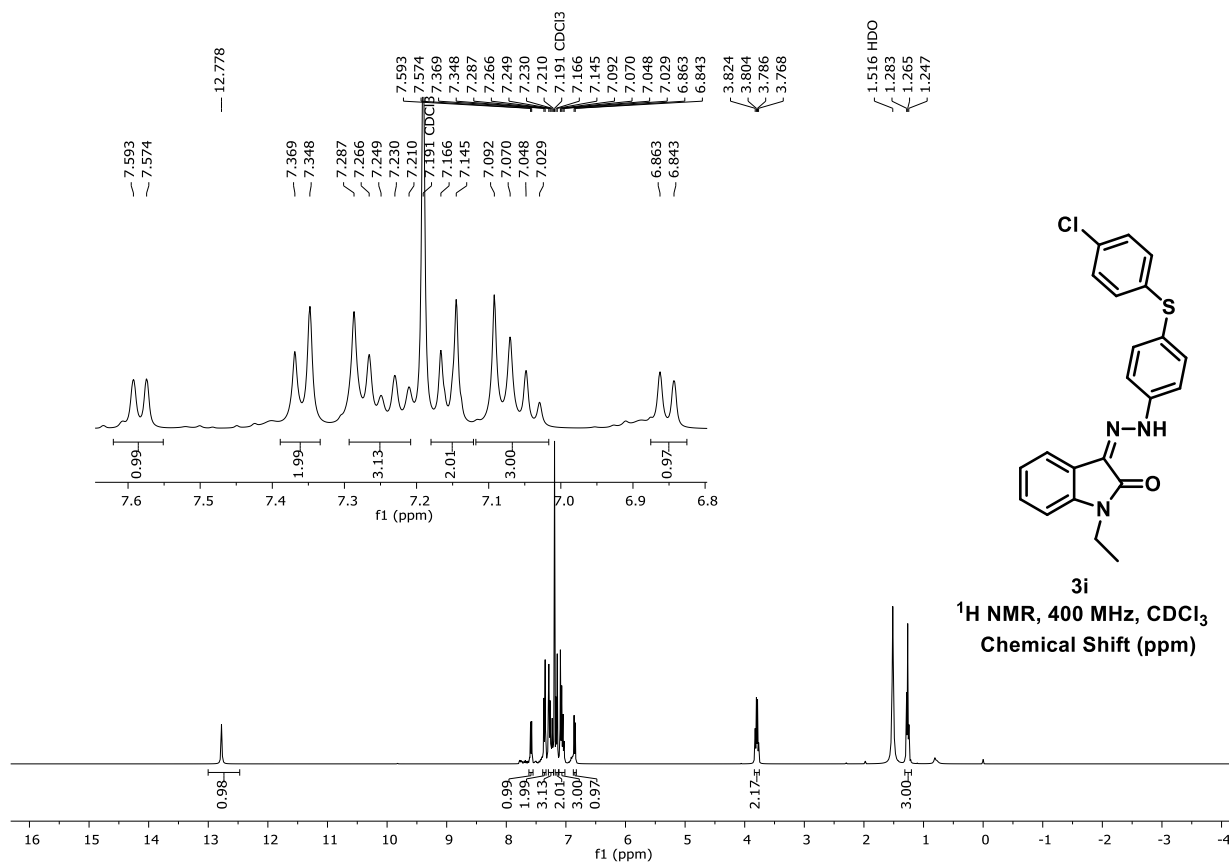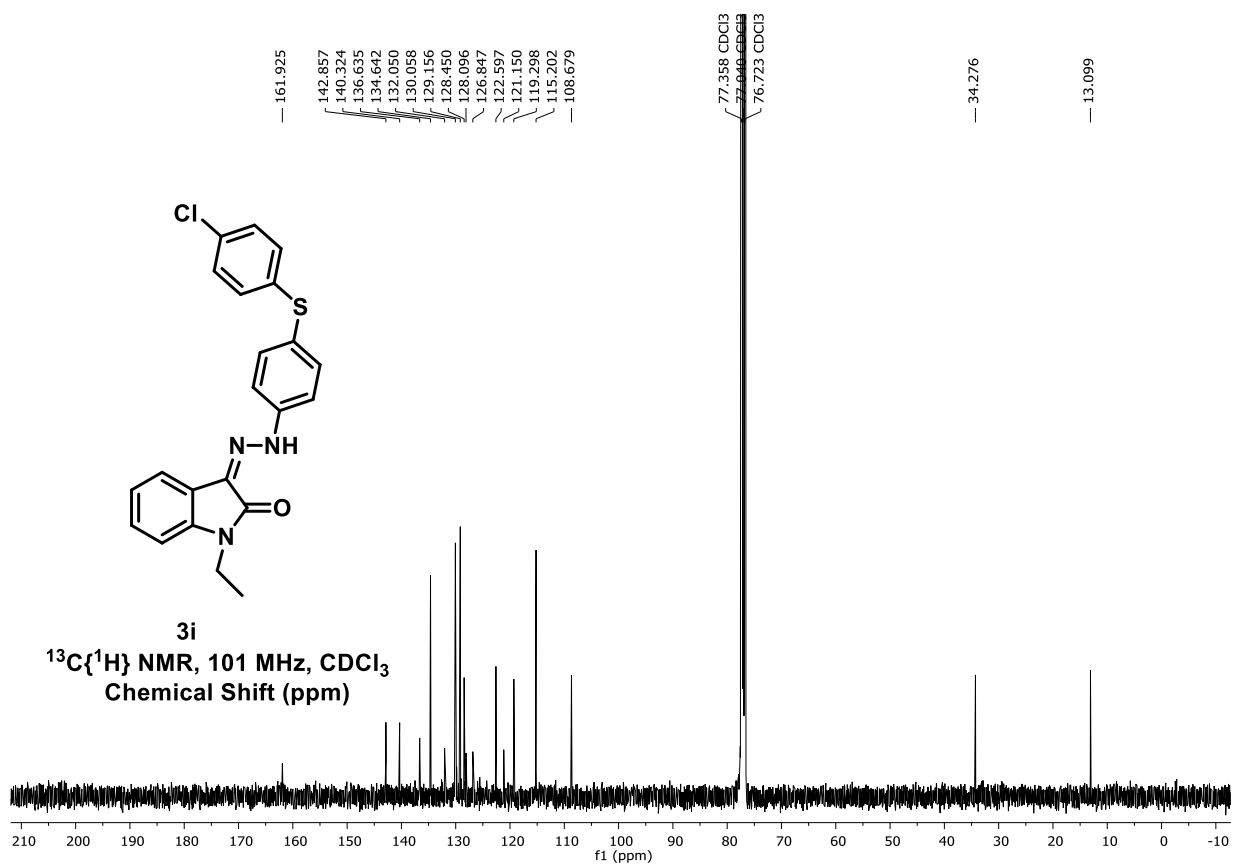

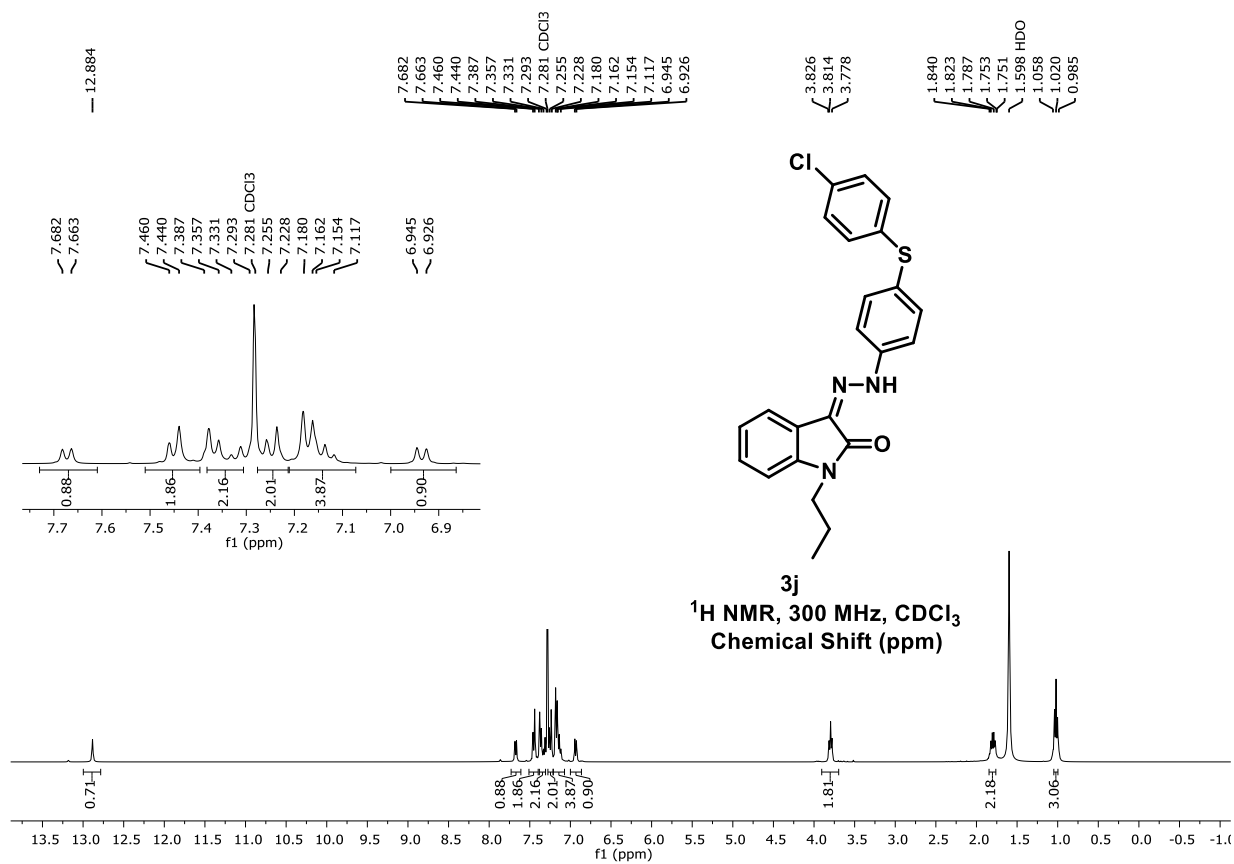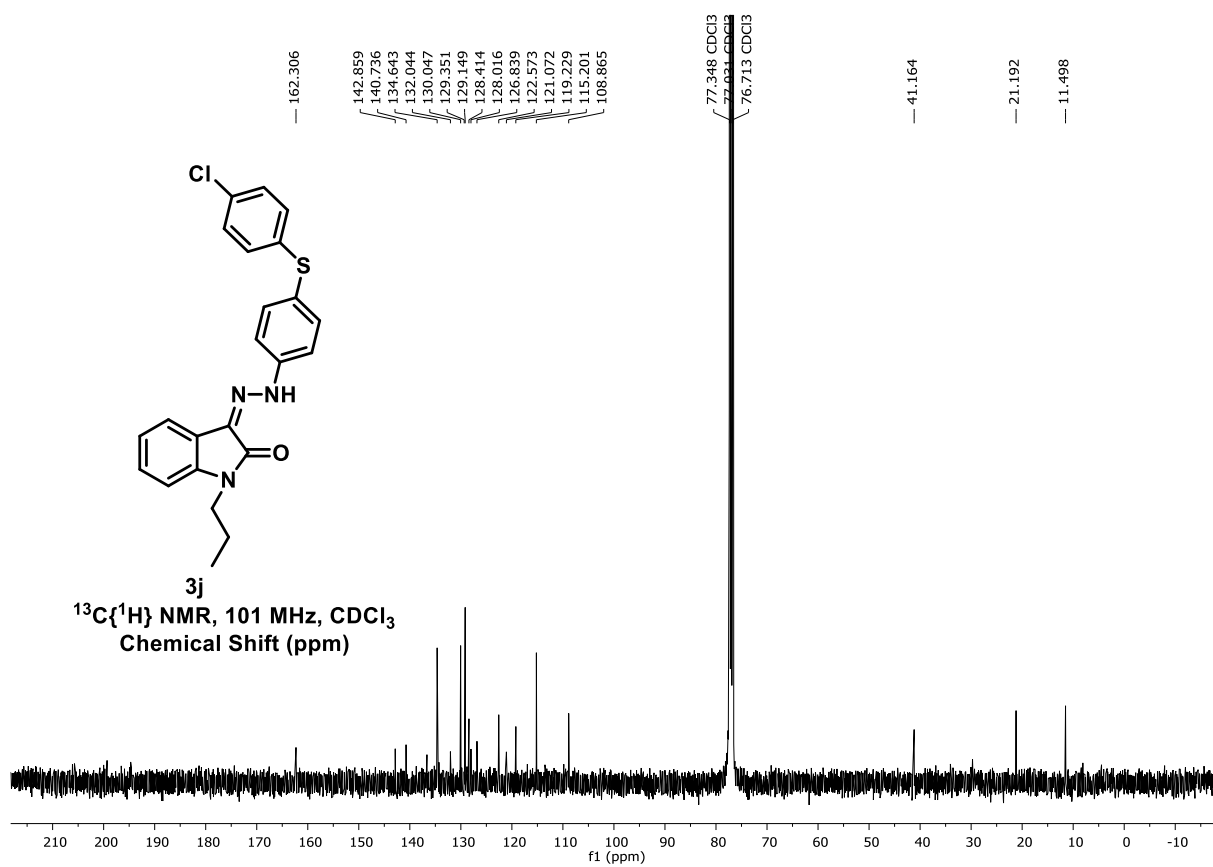

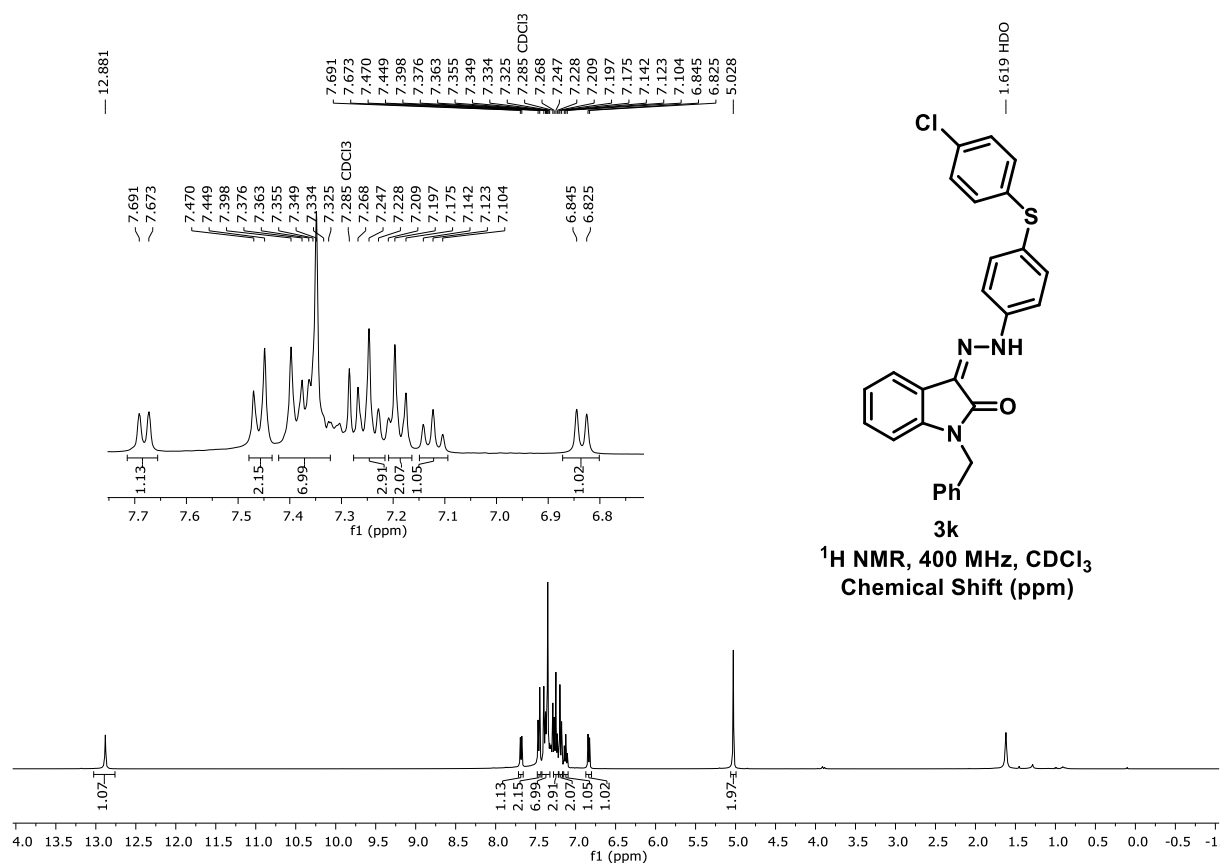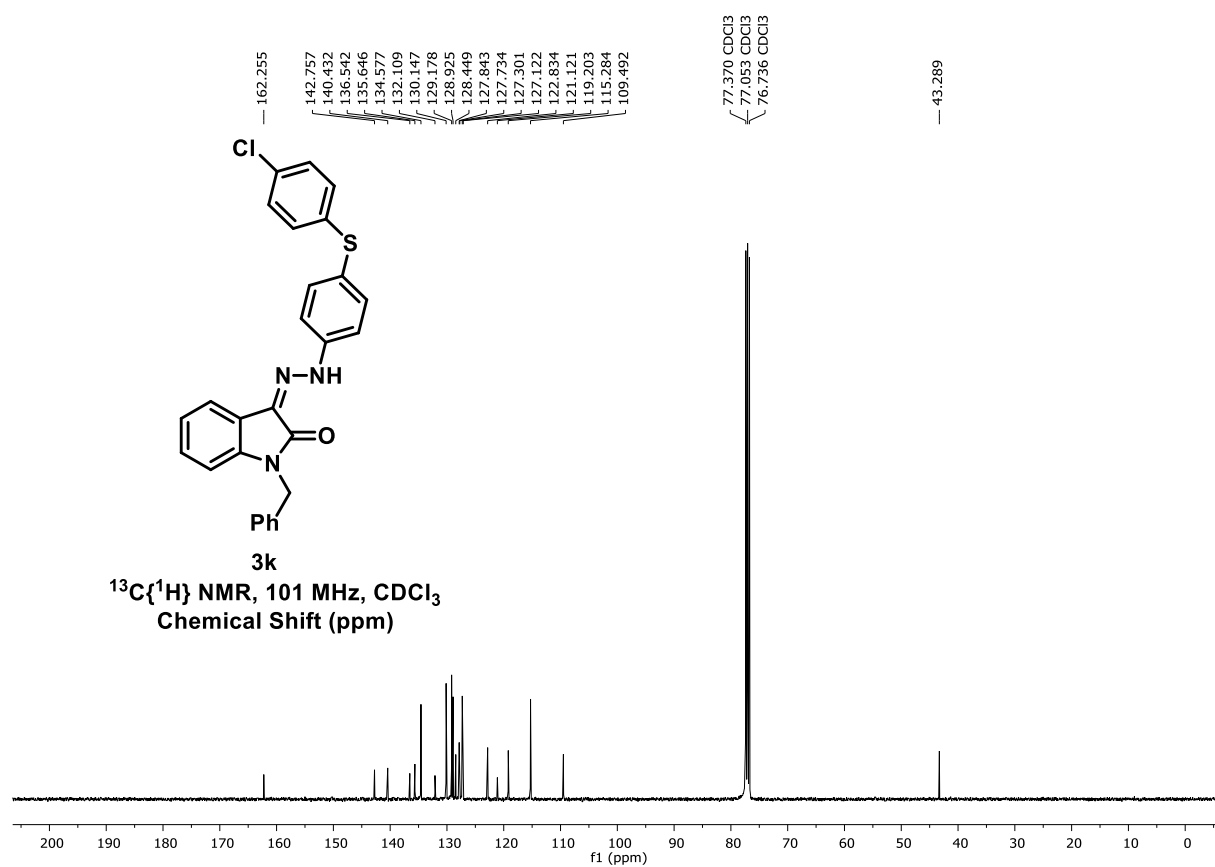

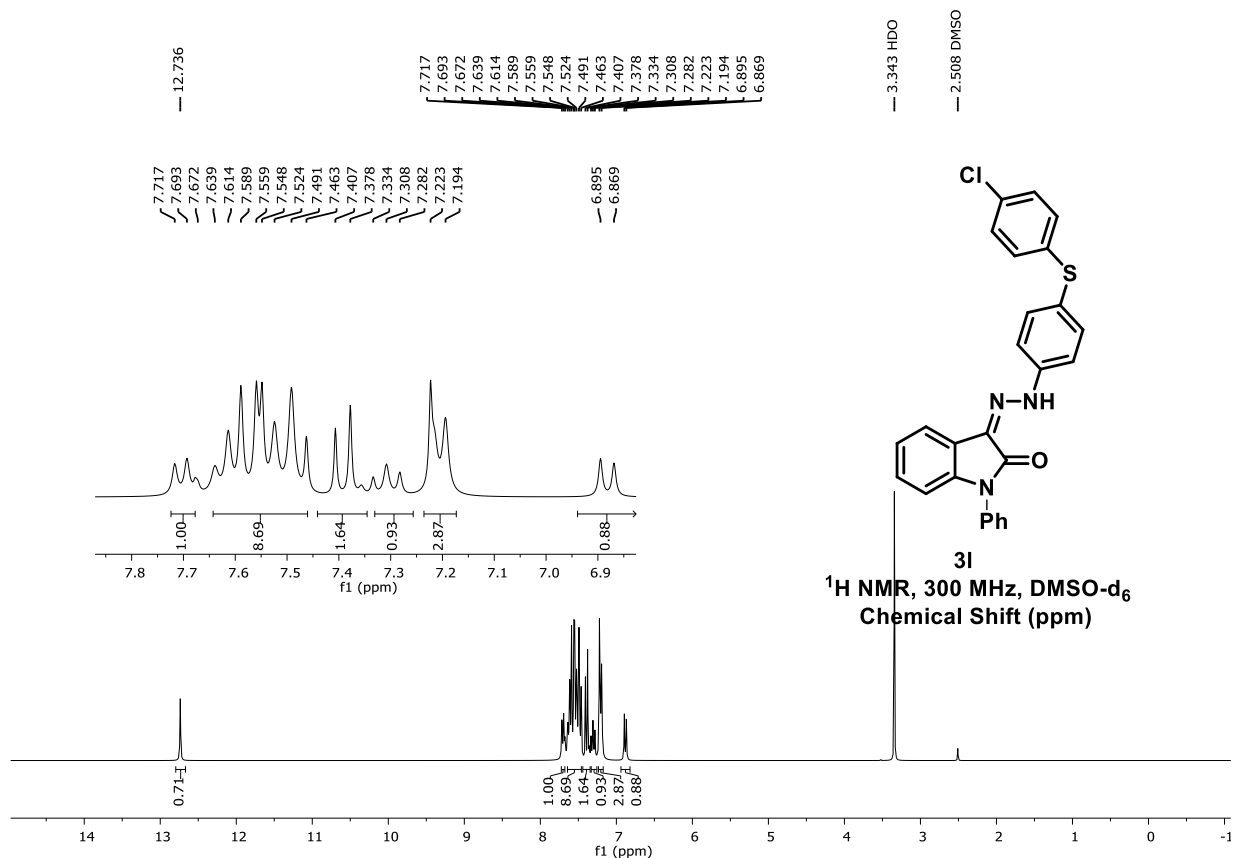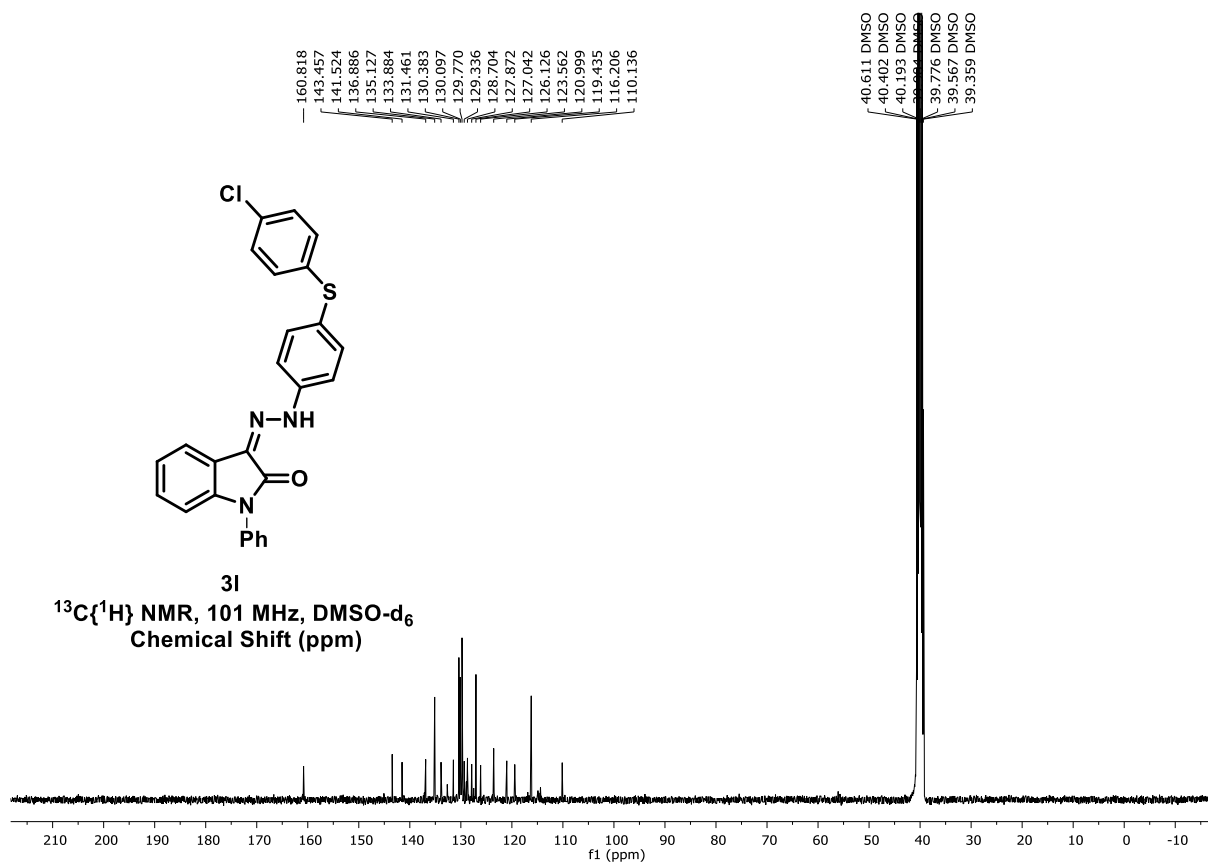

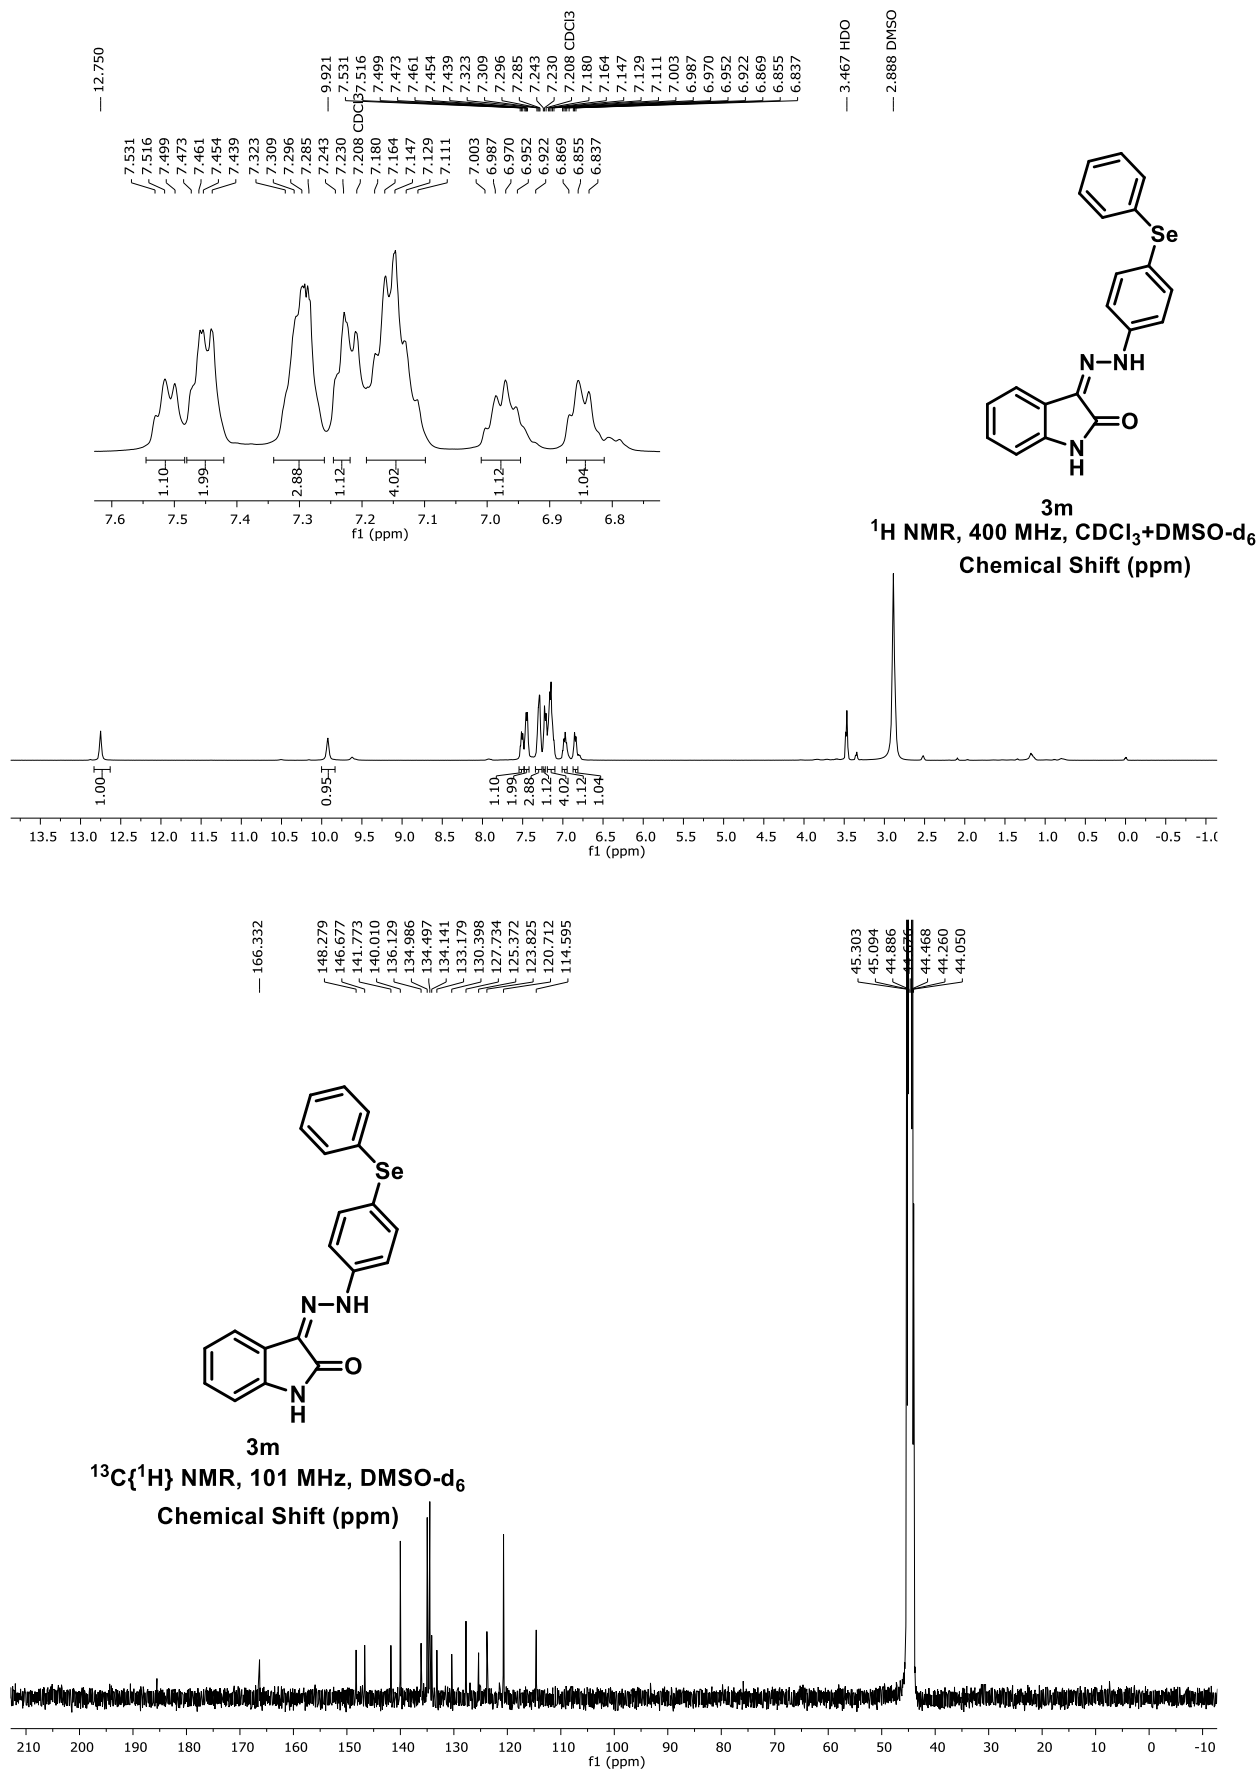

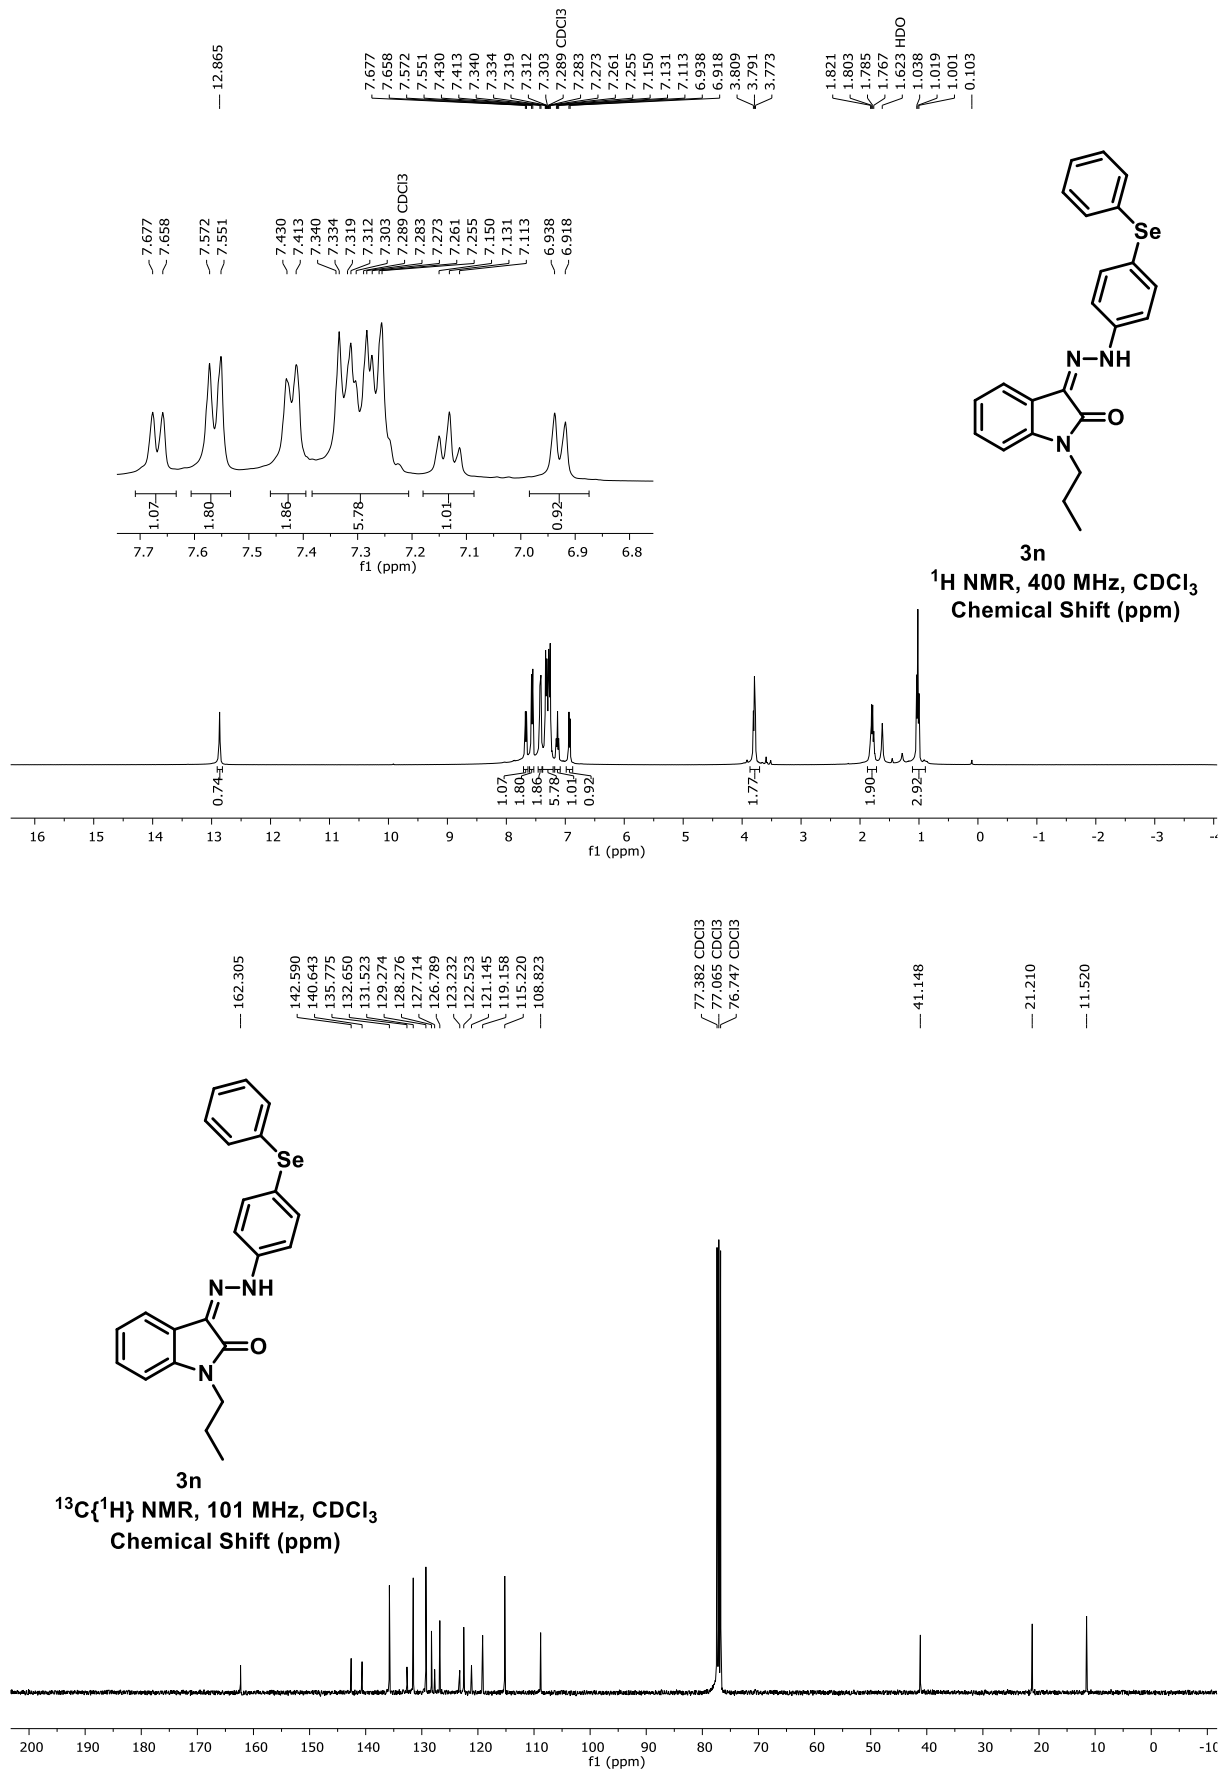

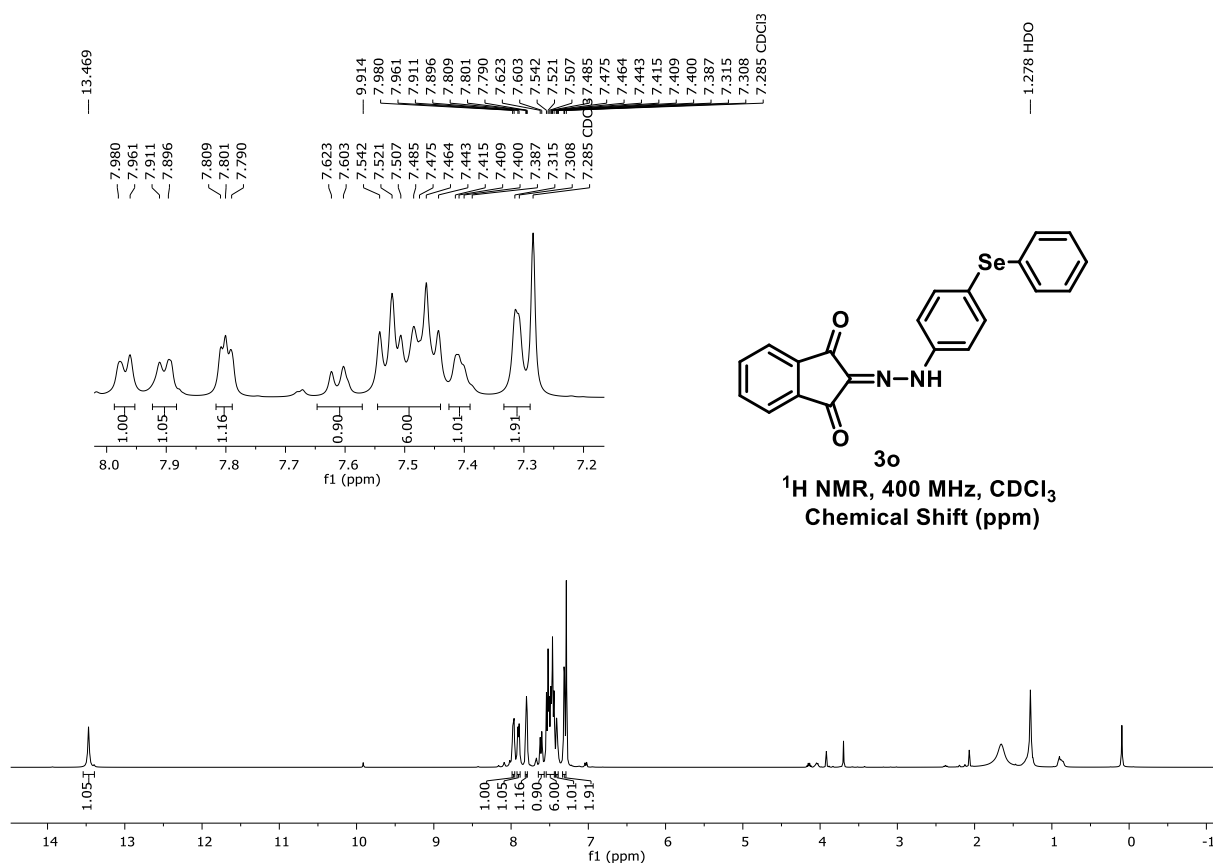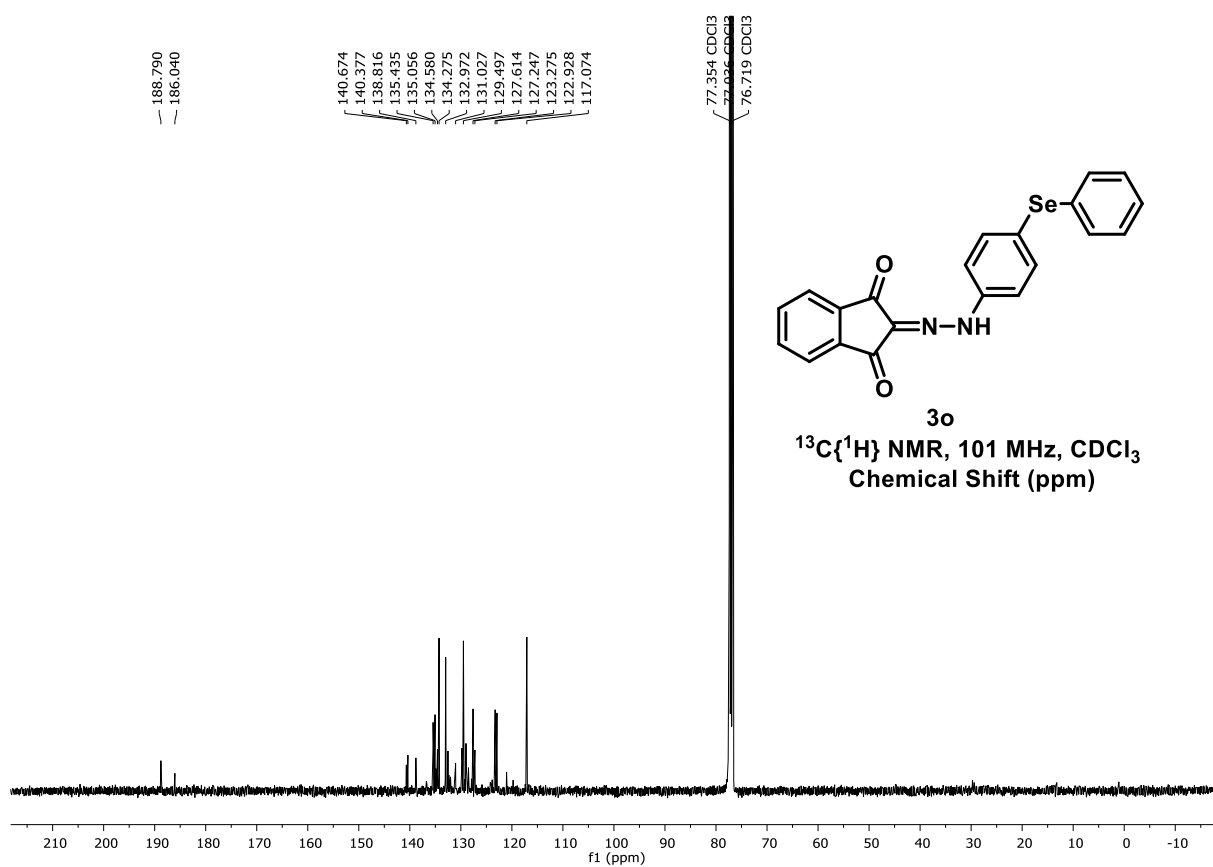

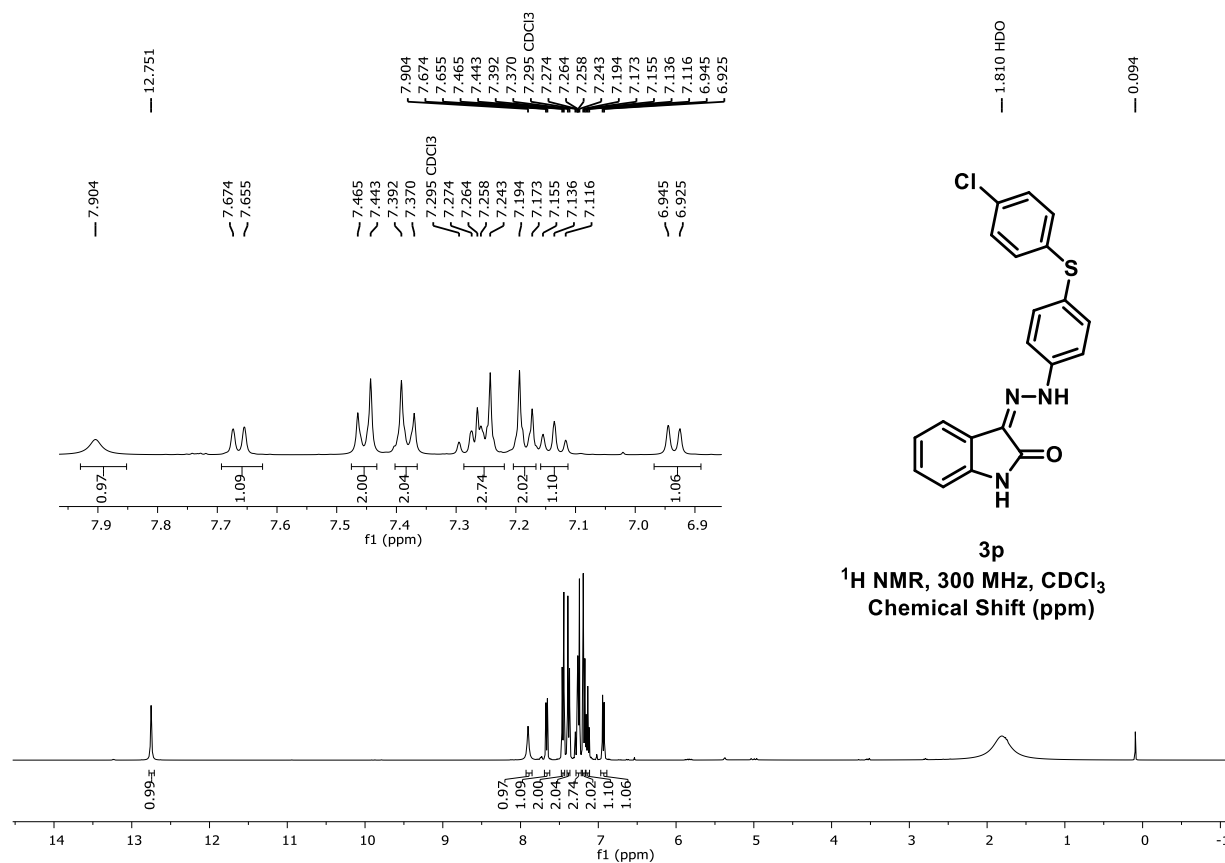

f

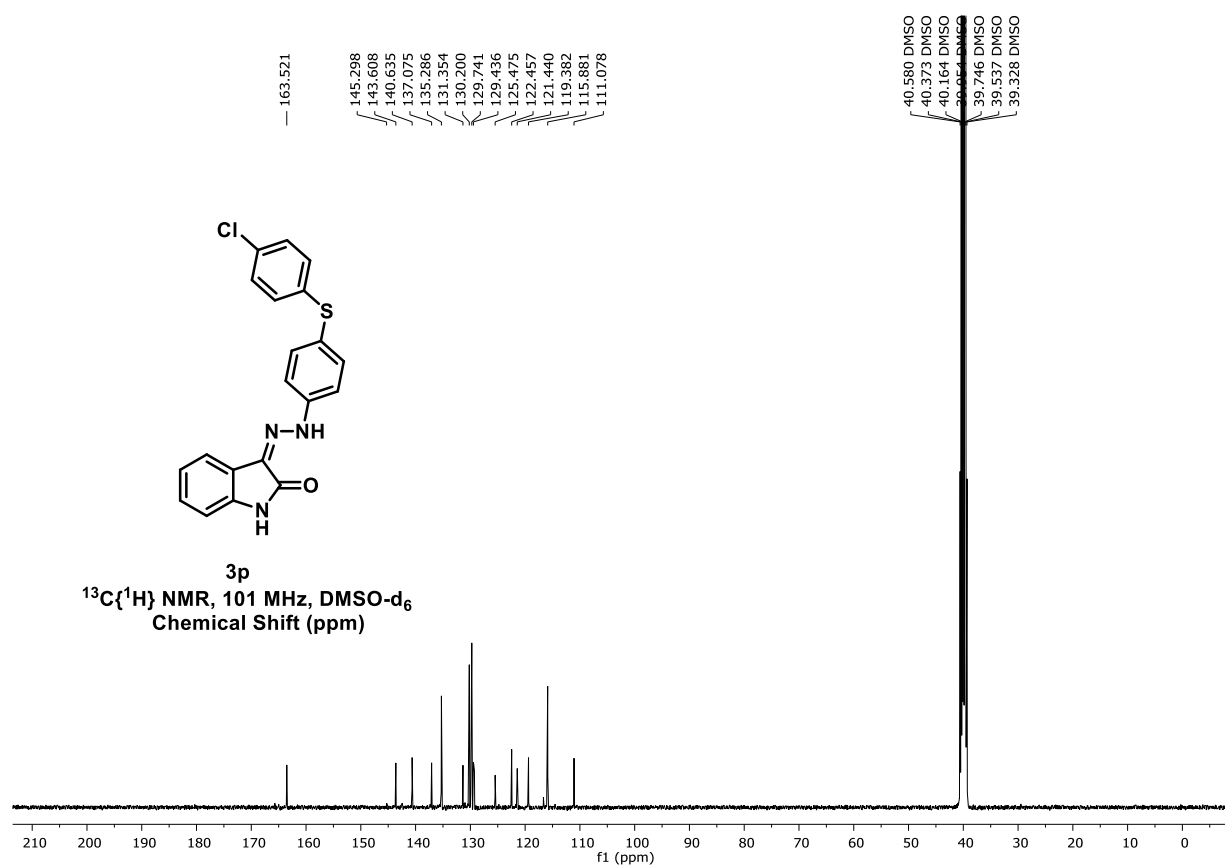



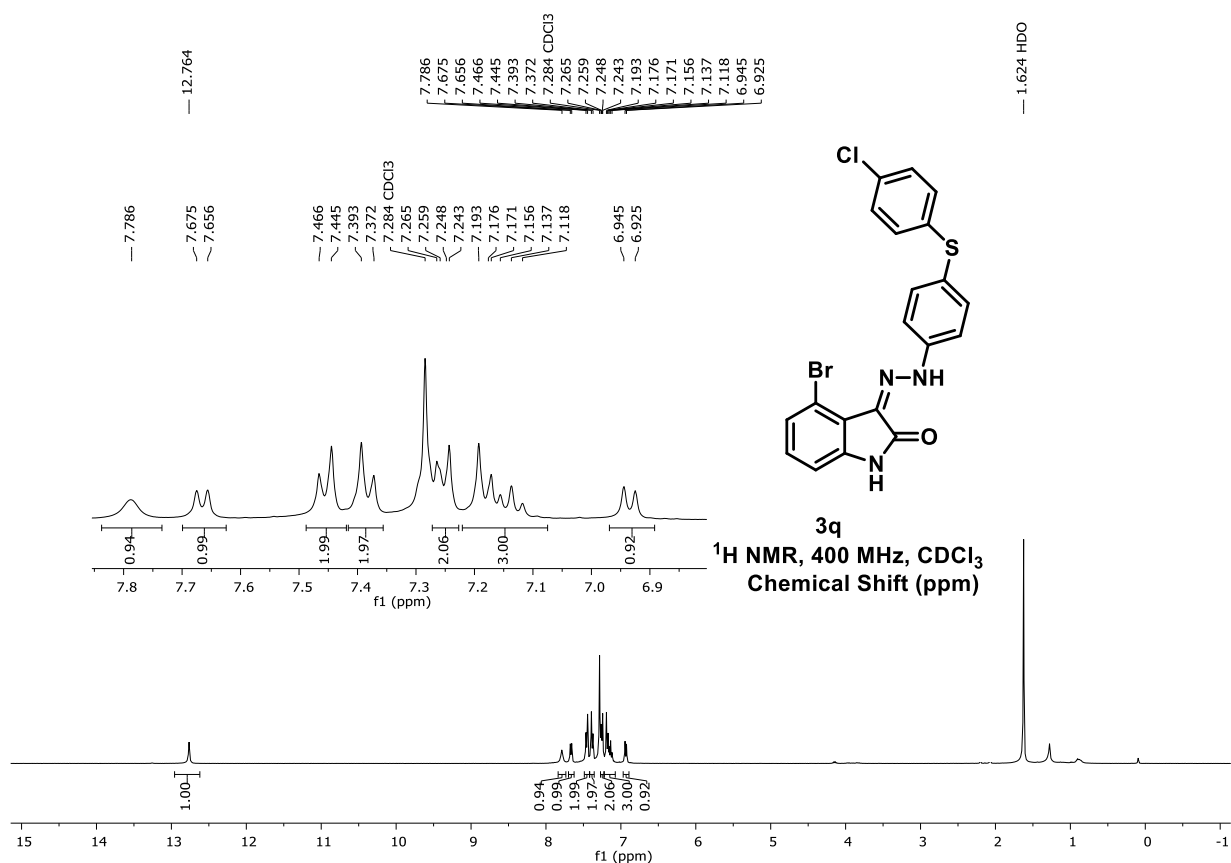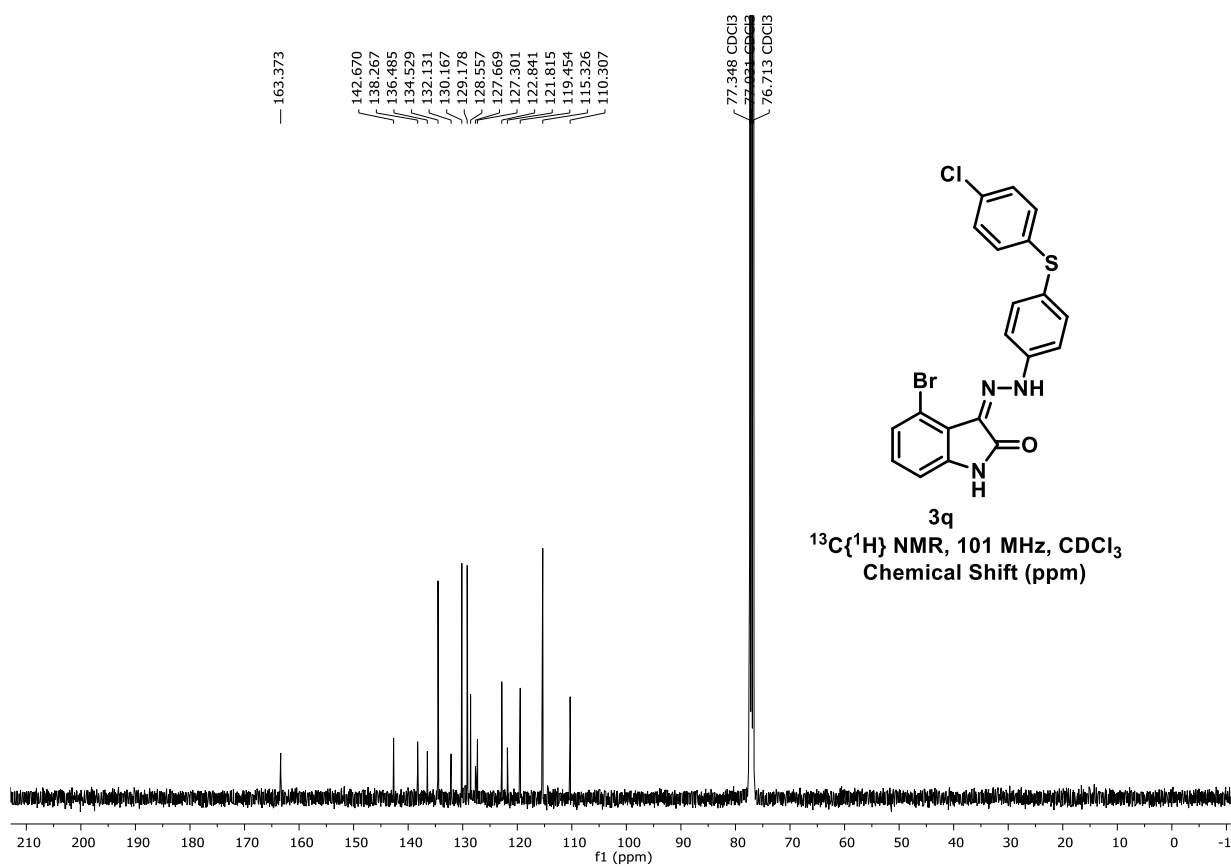

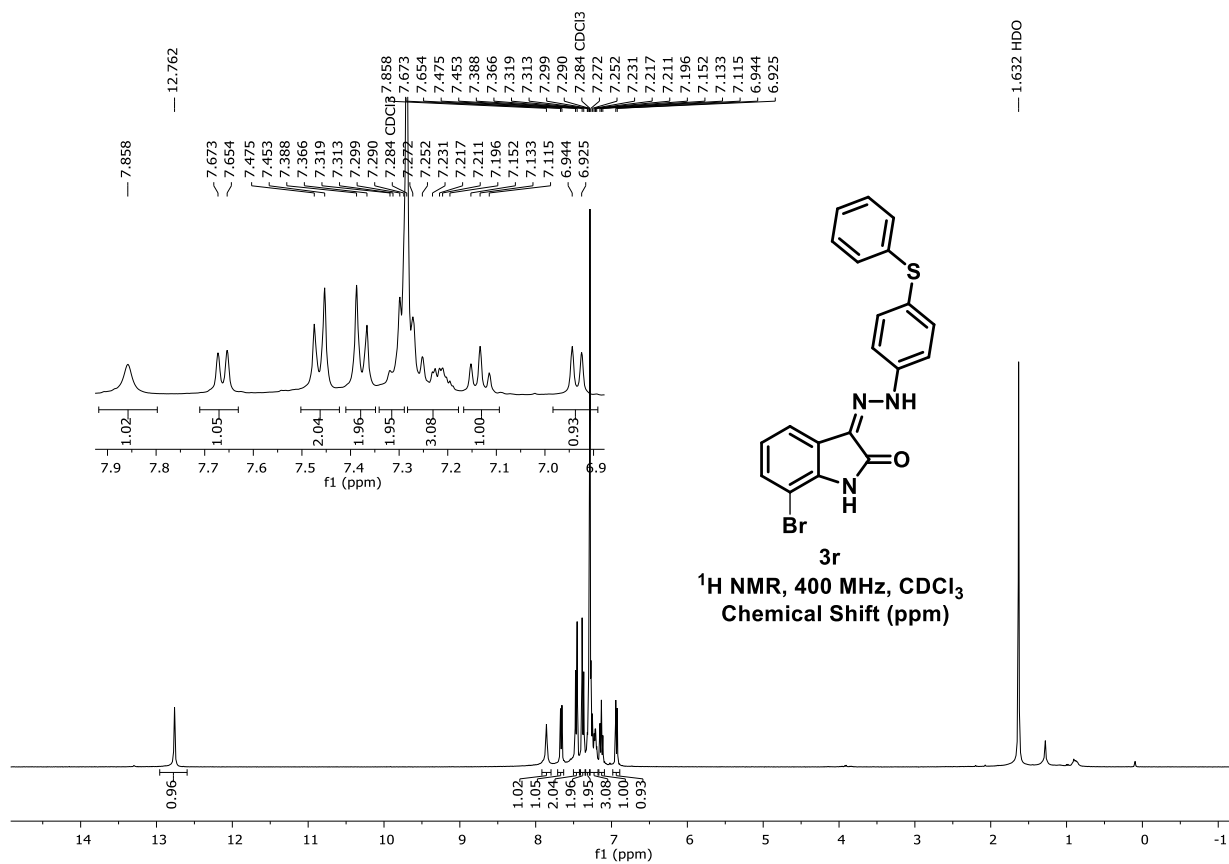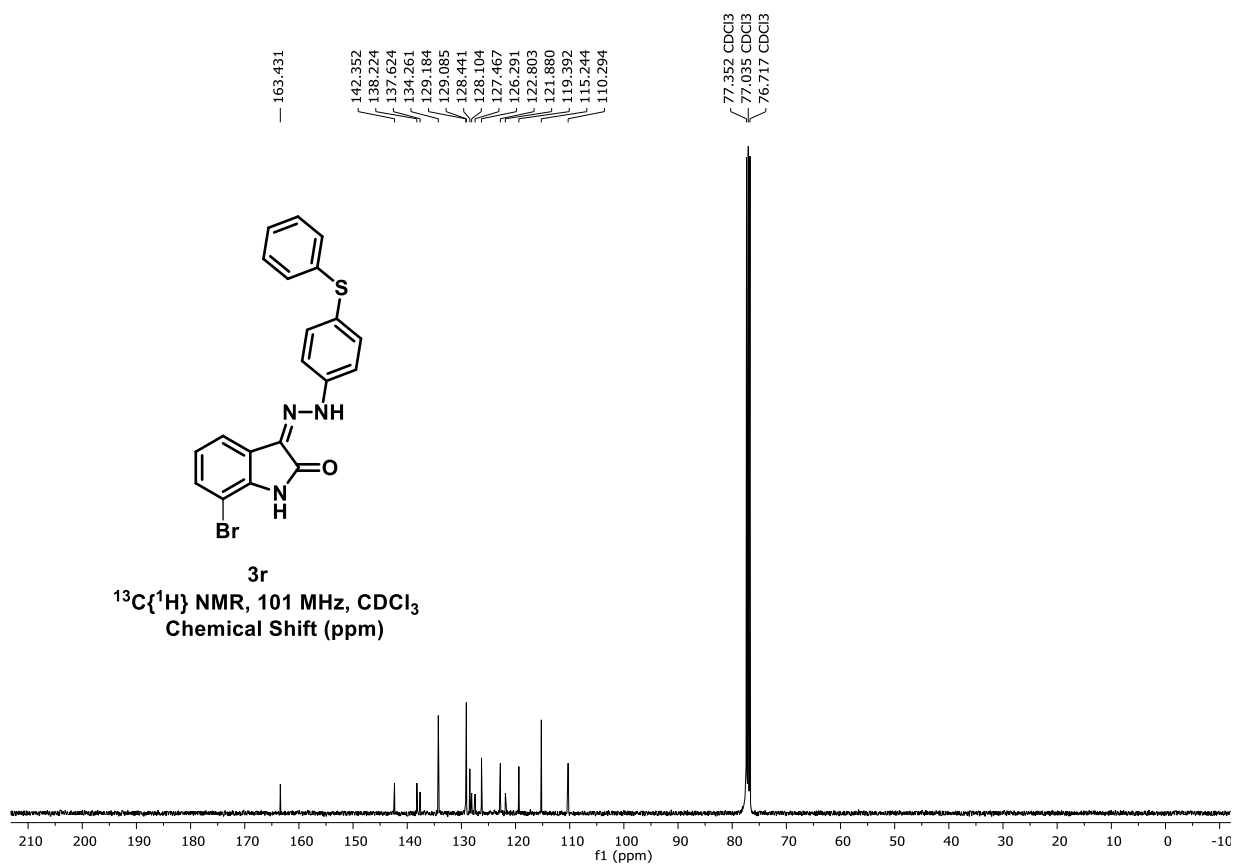

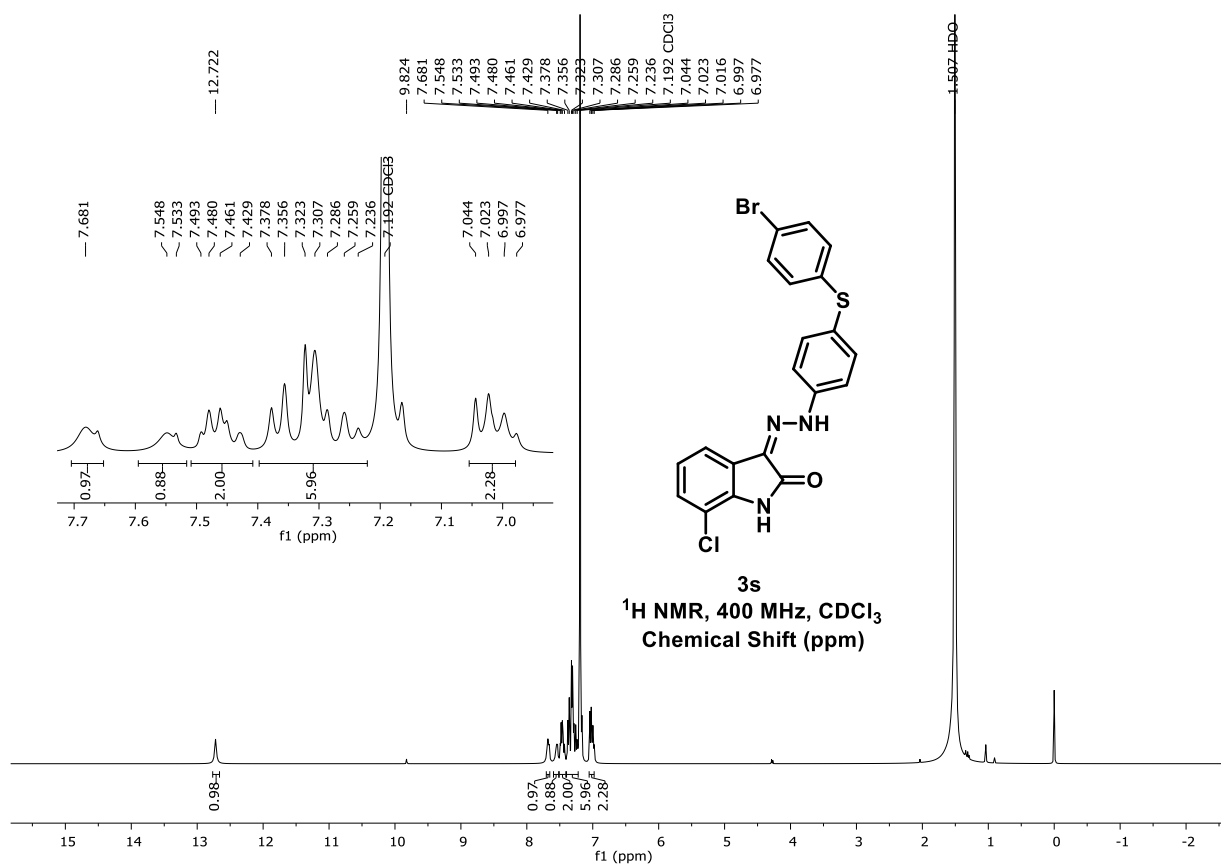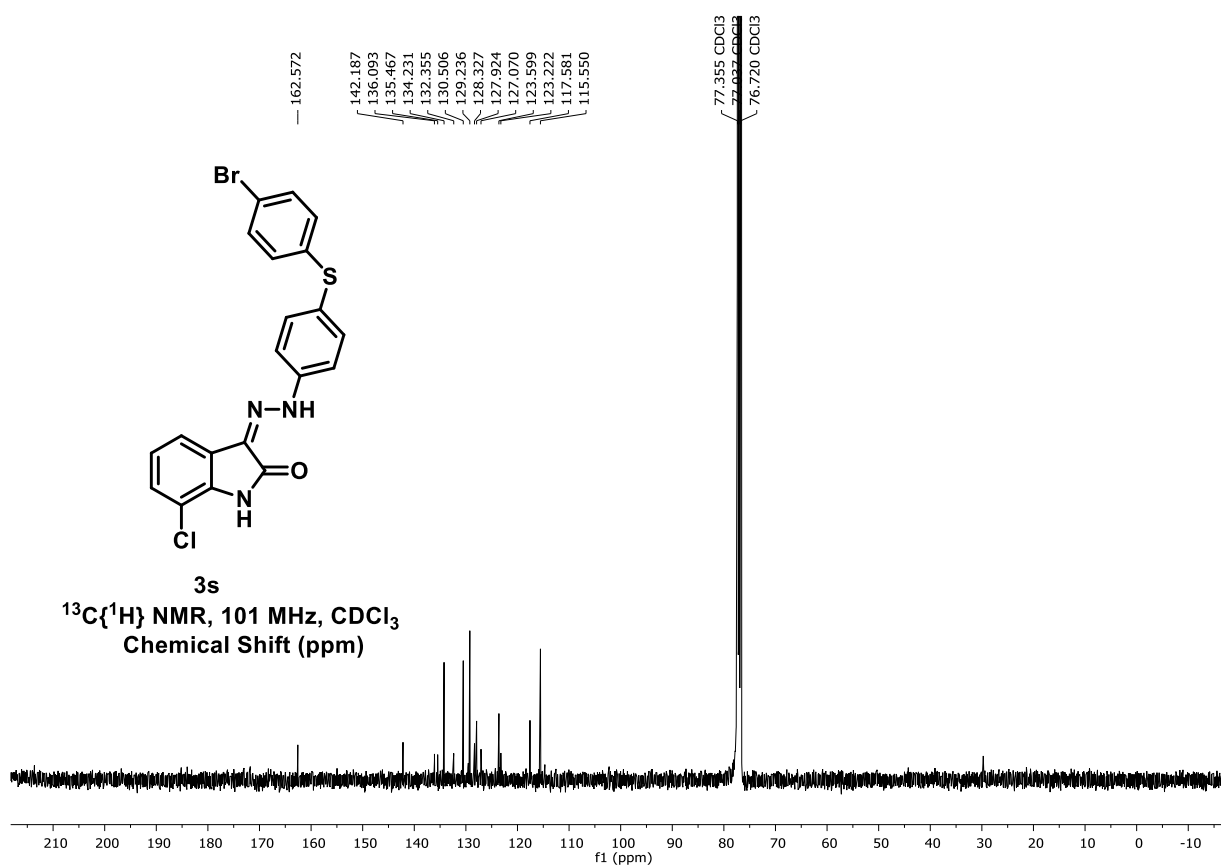



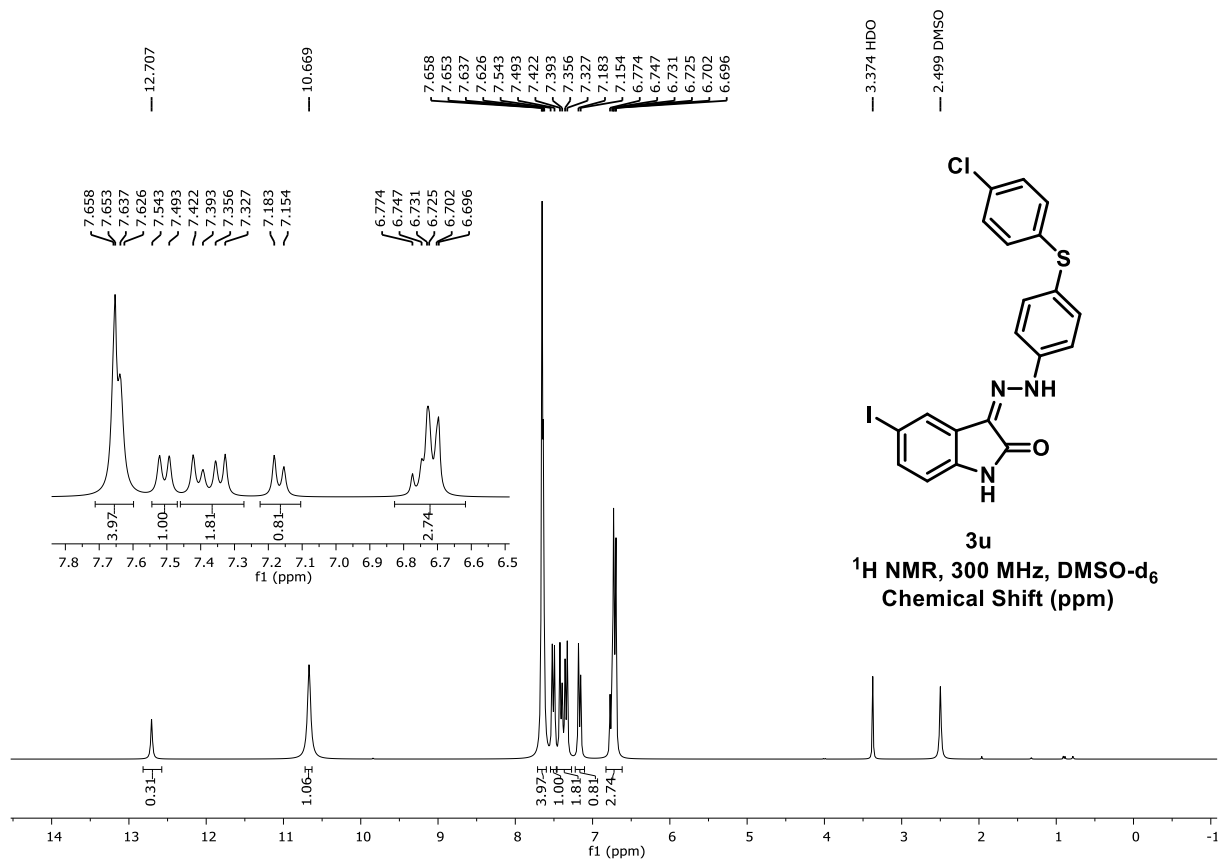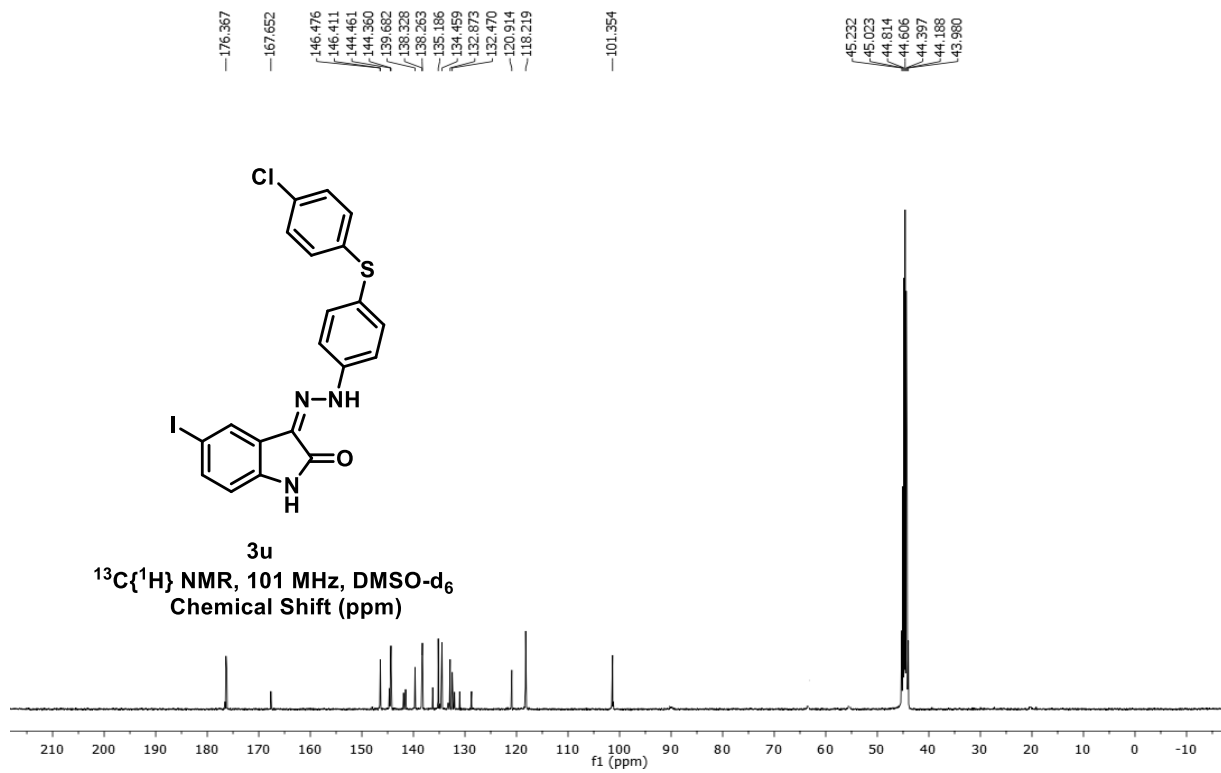

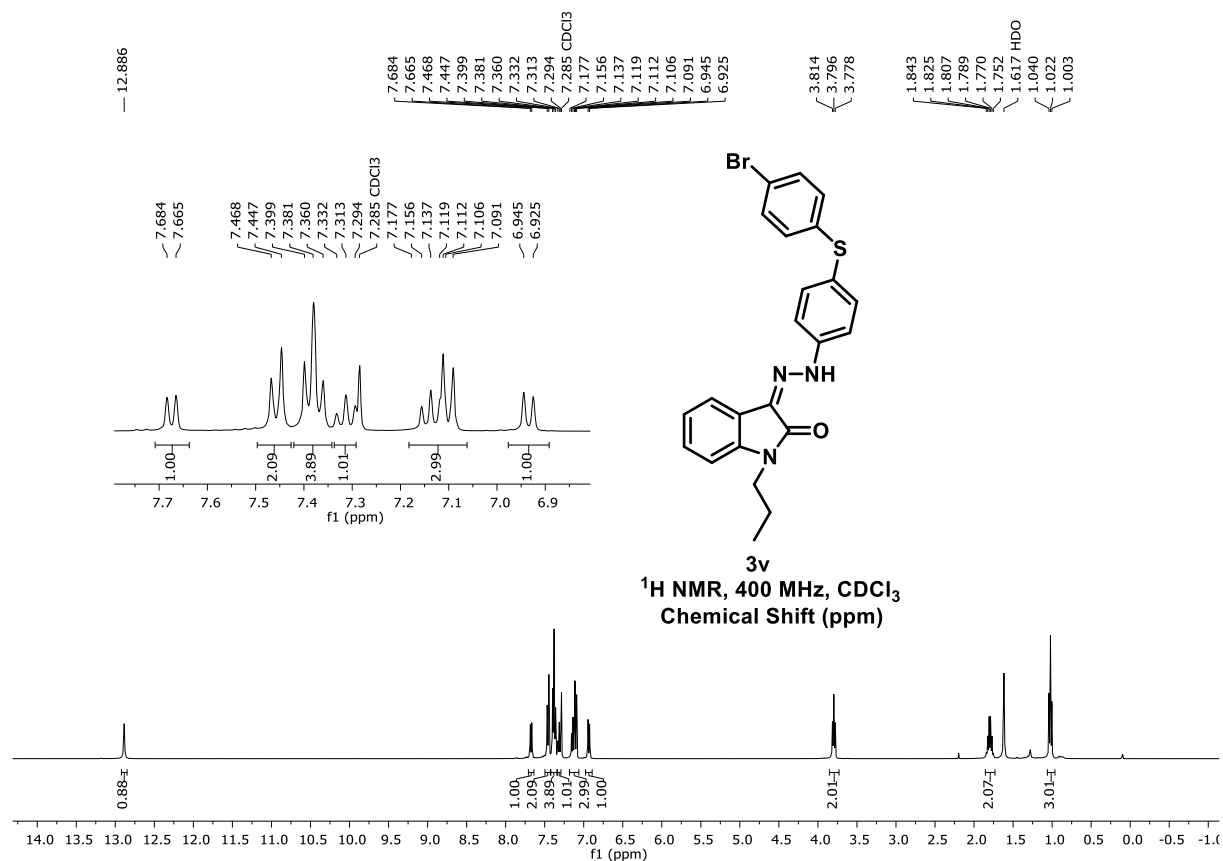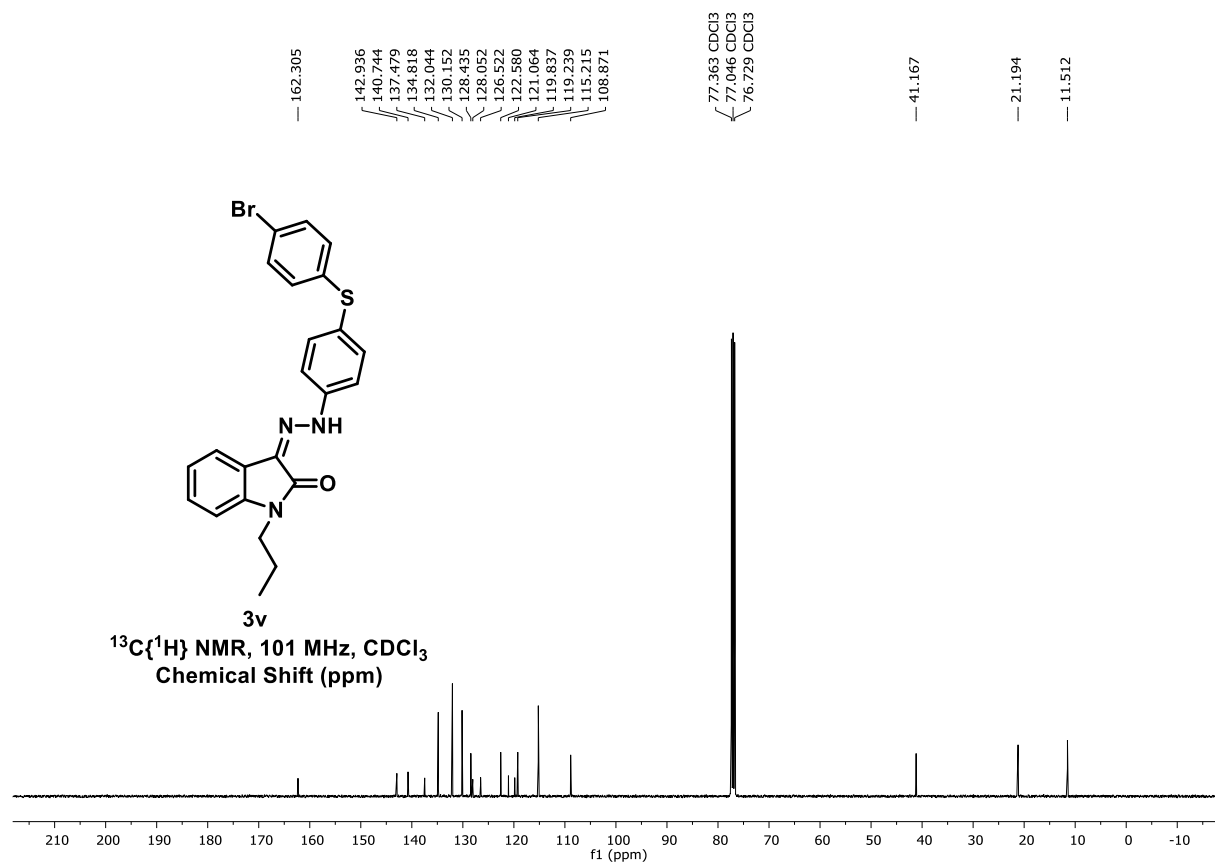

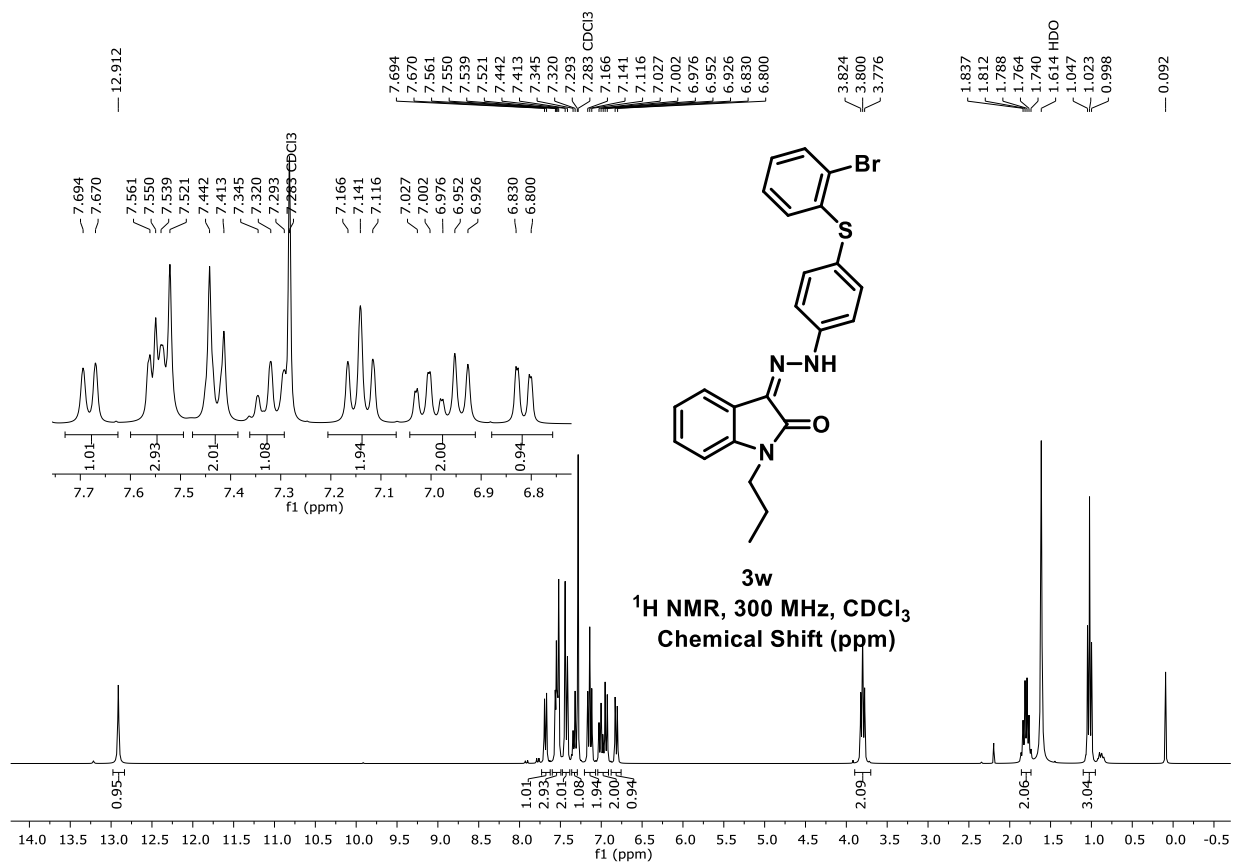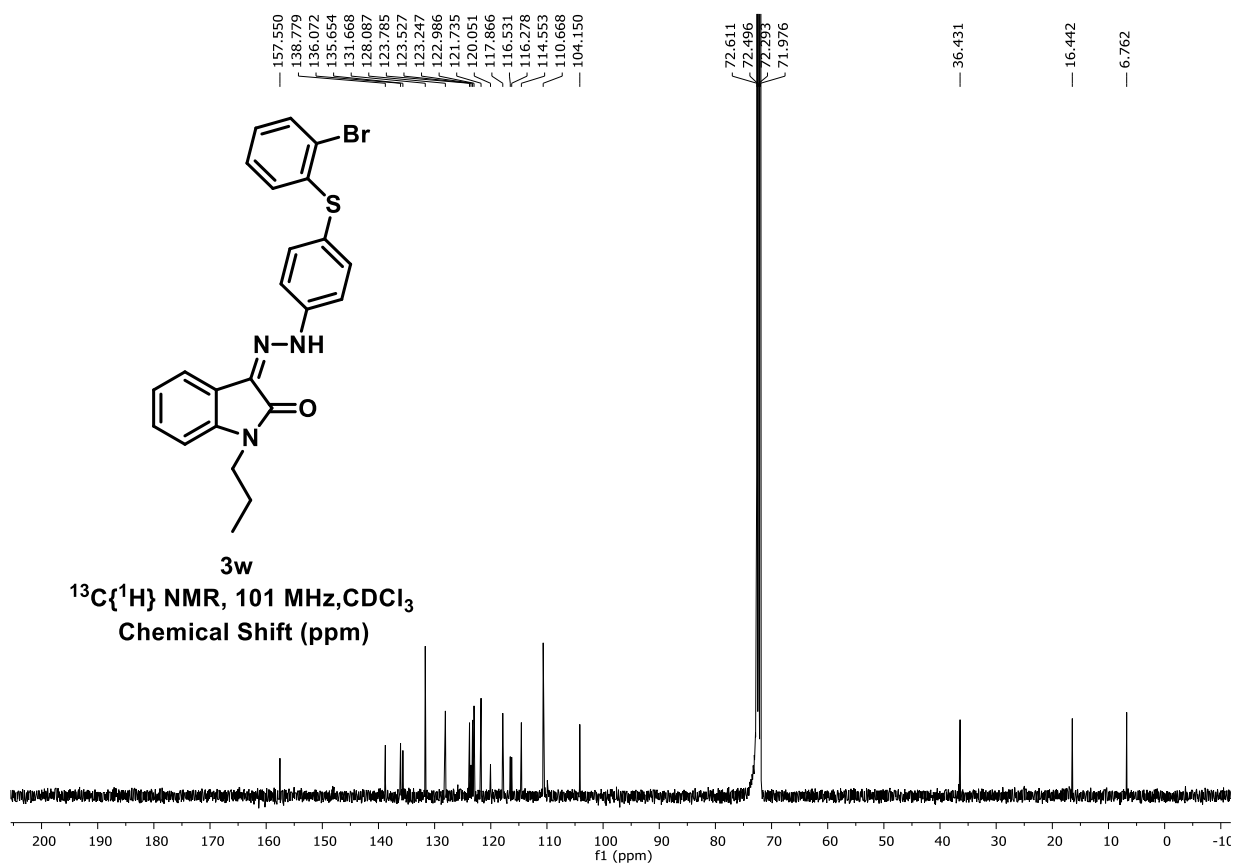

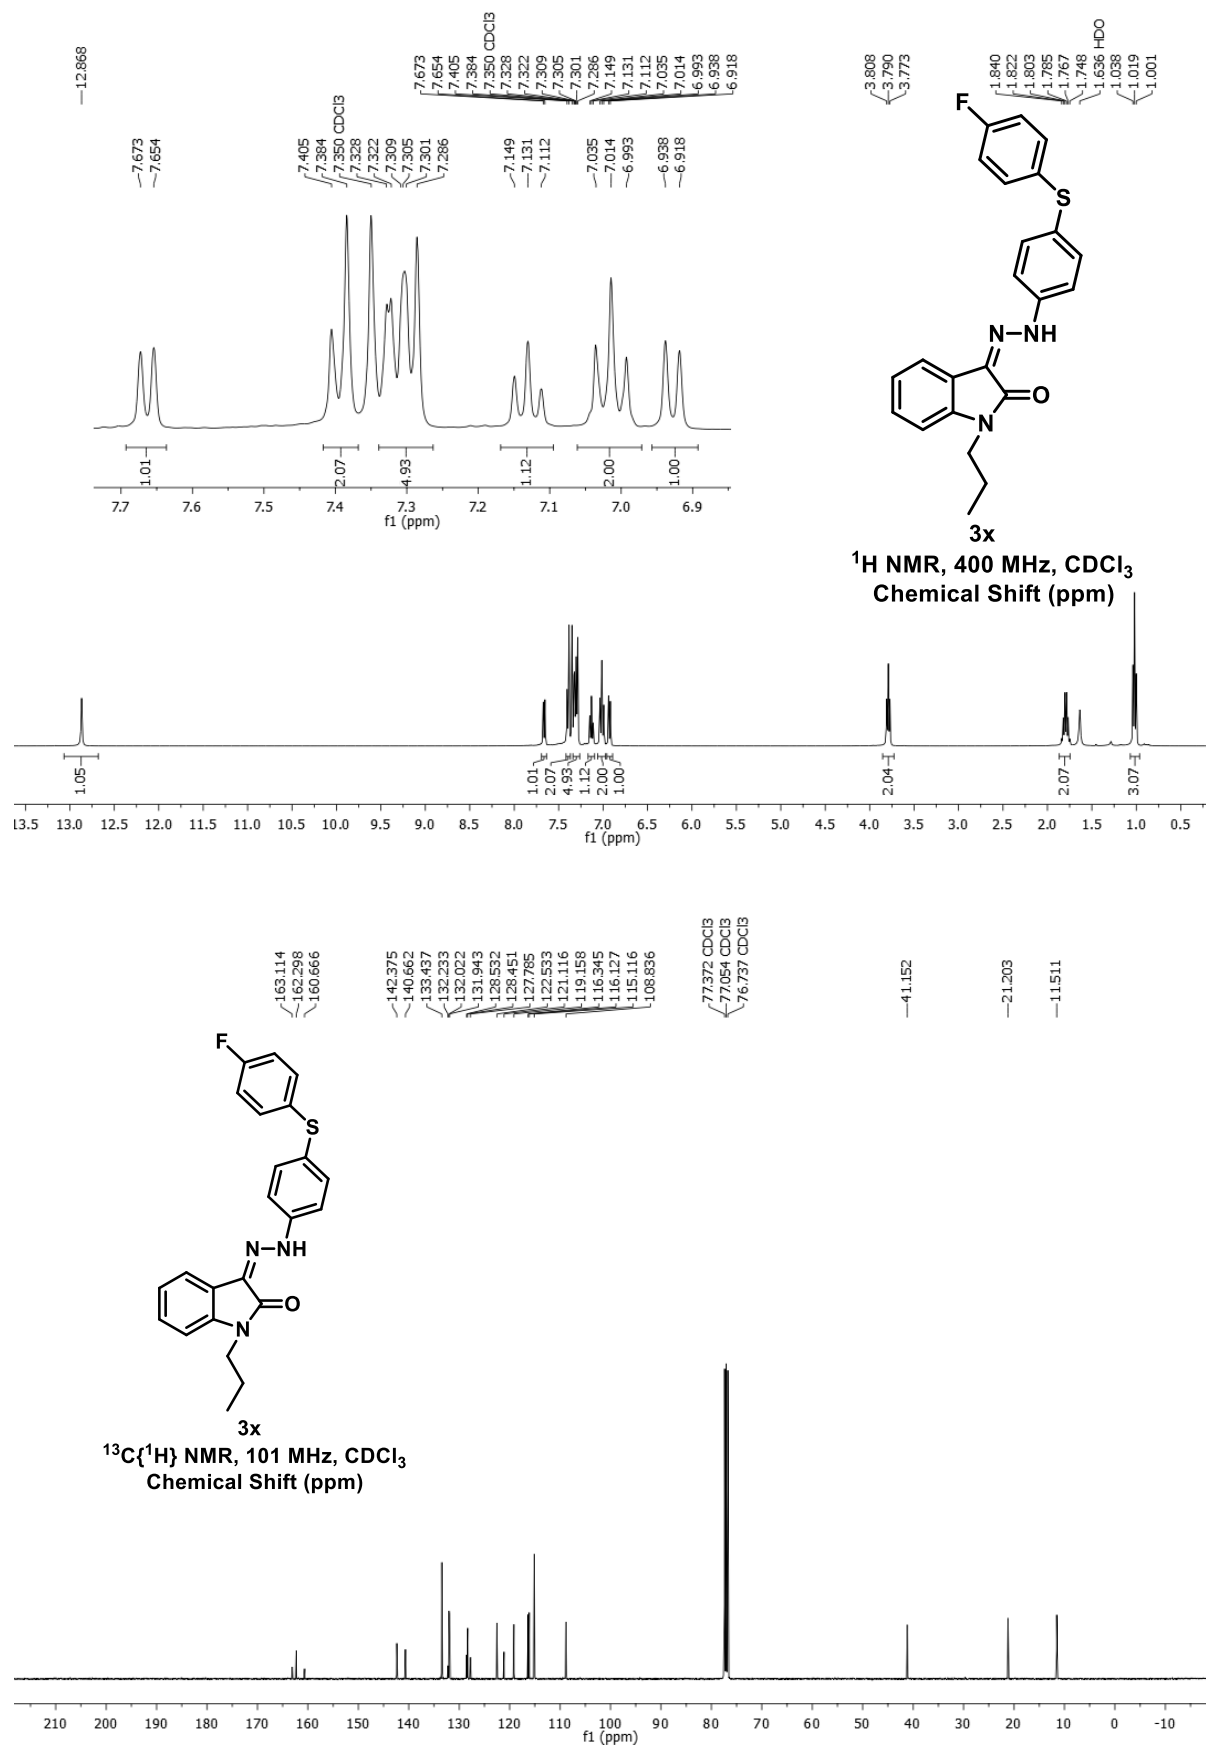



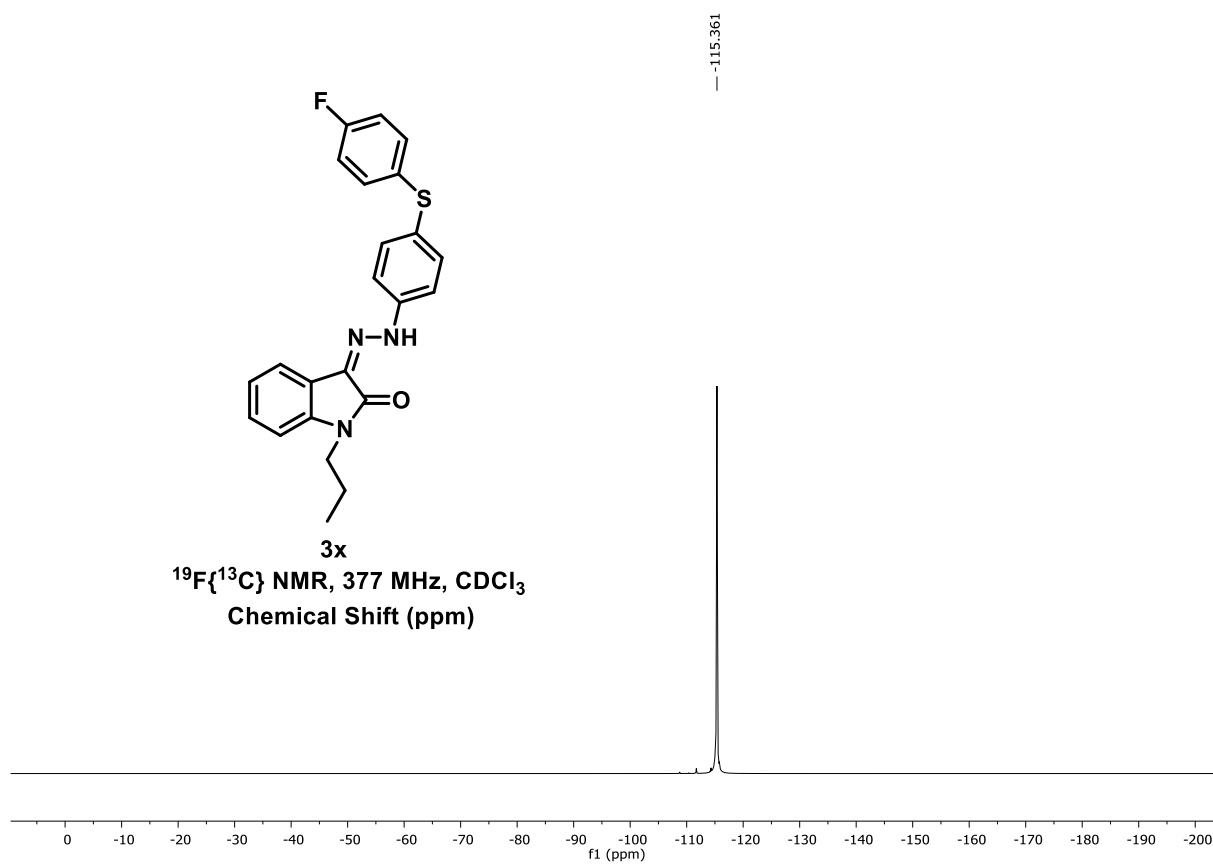

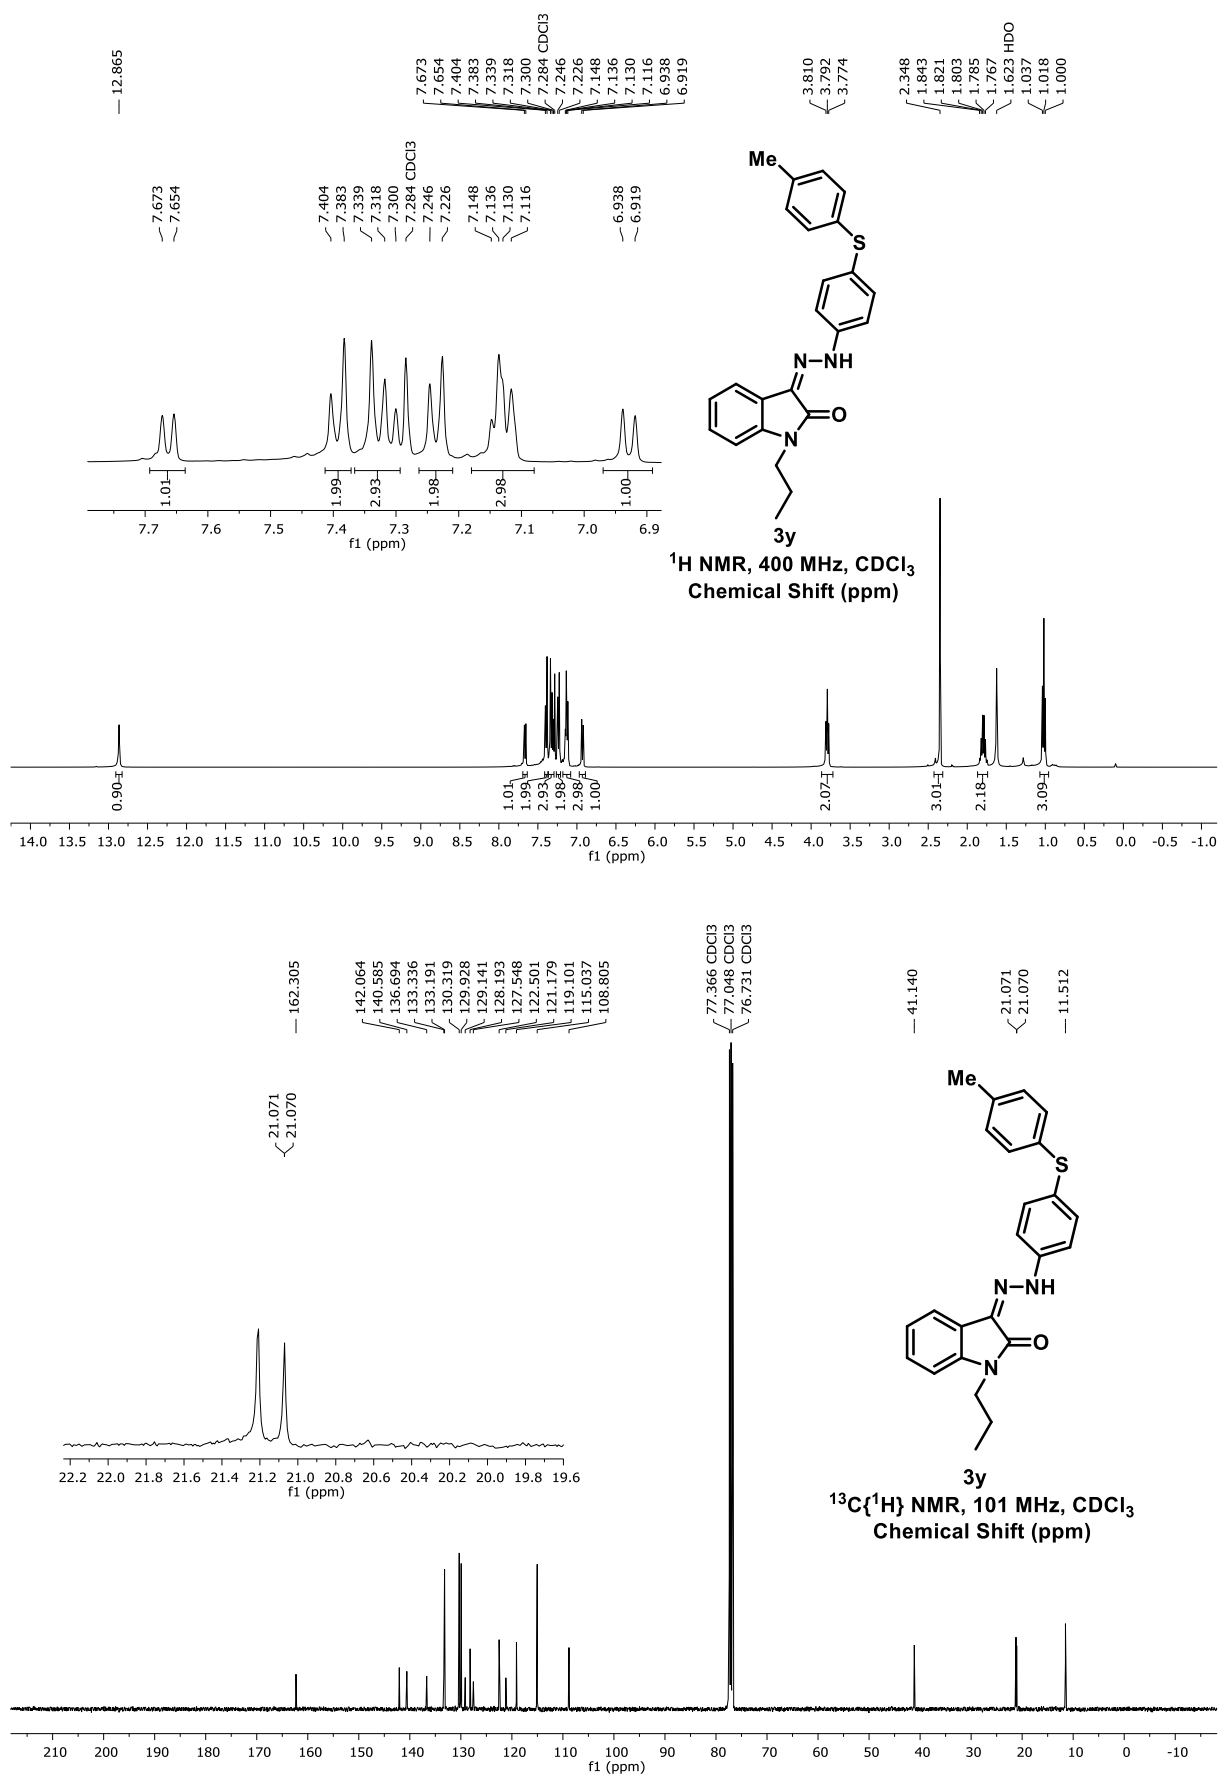

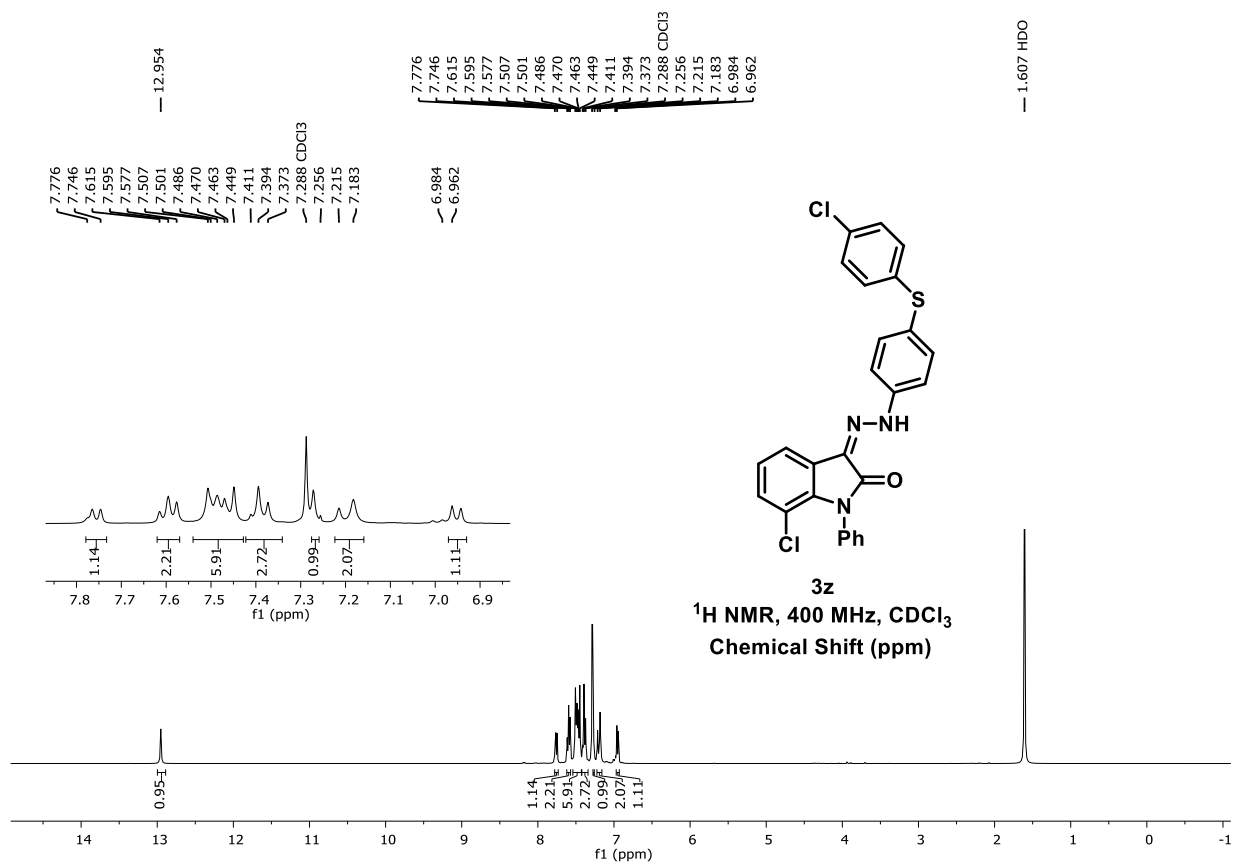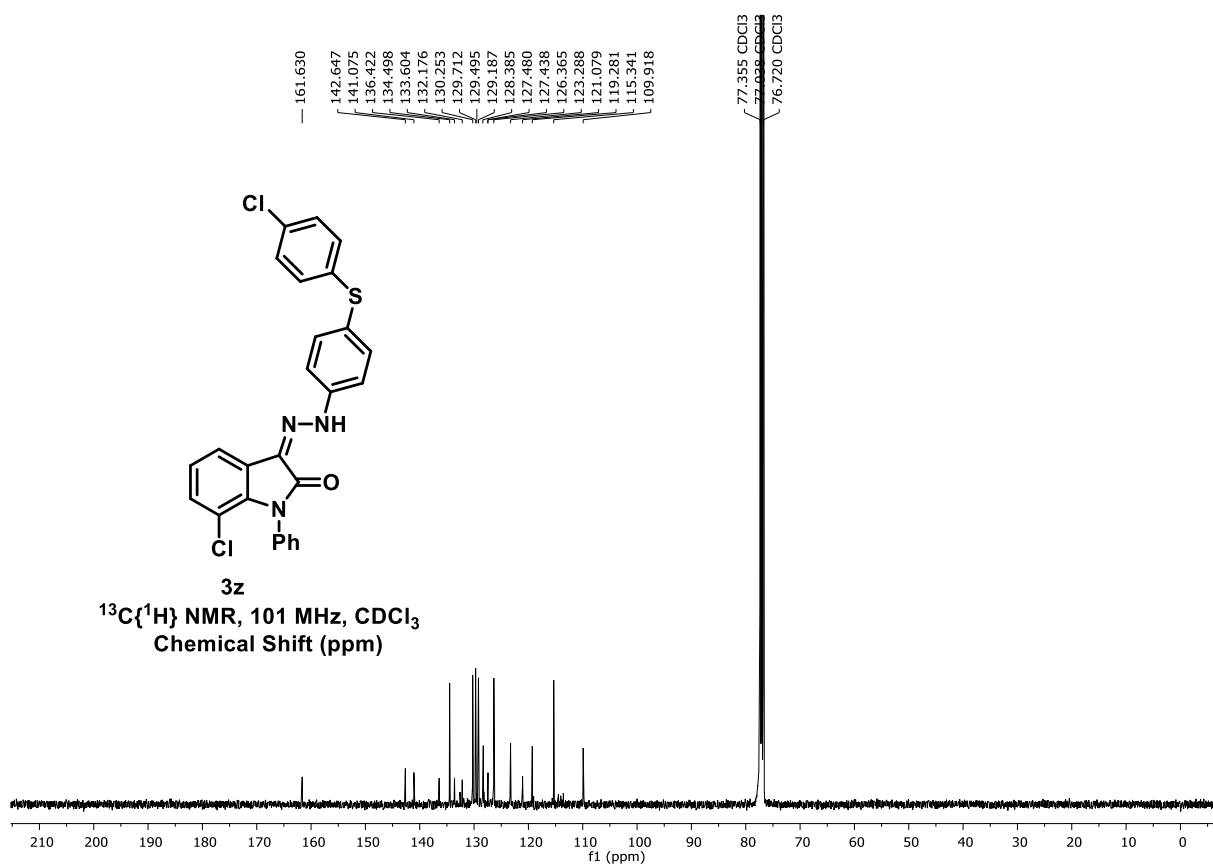

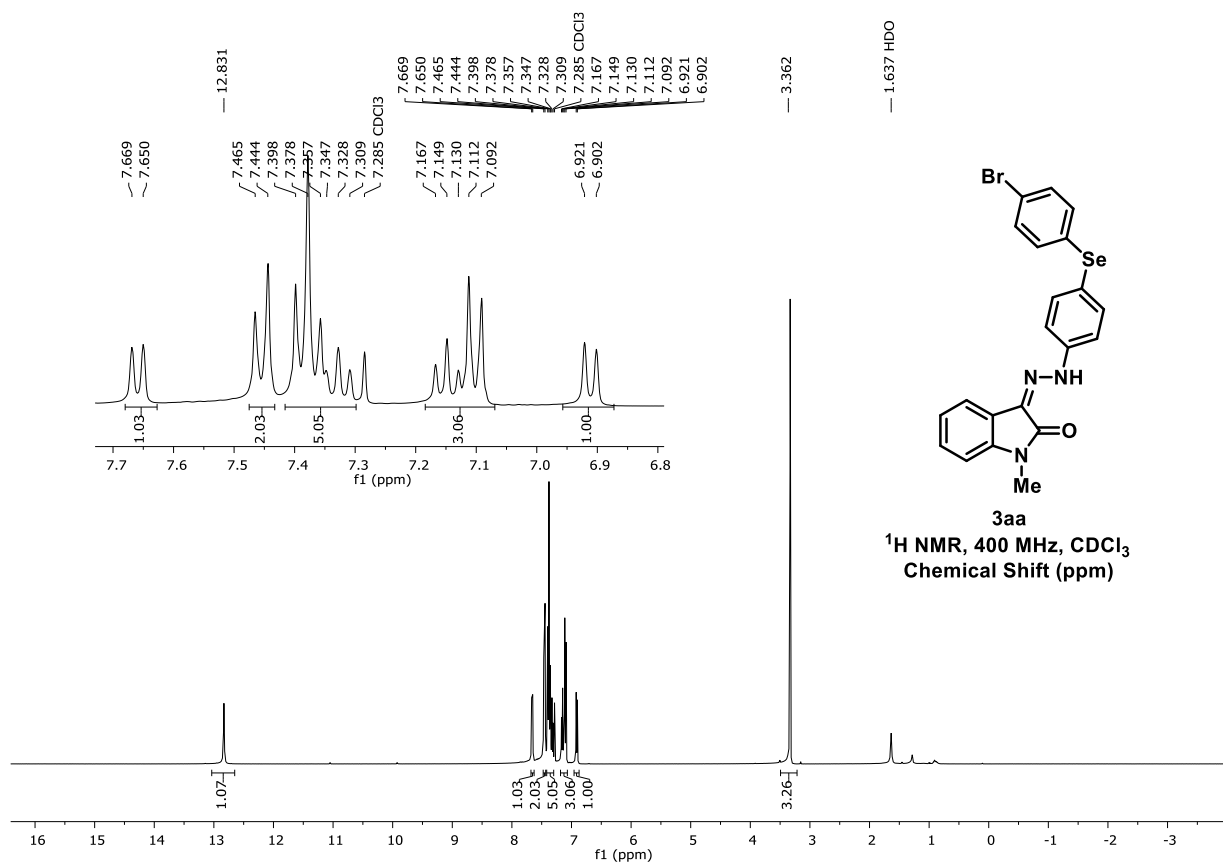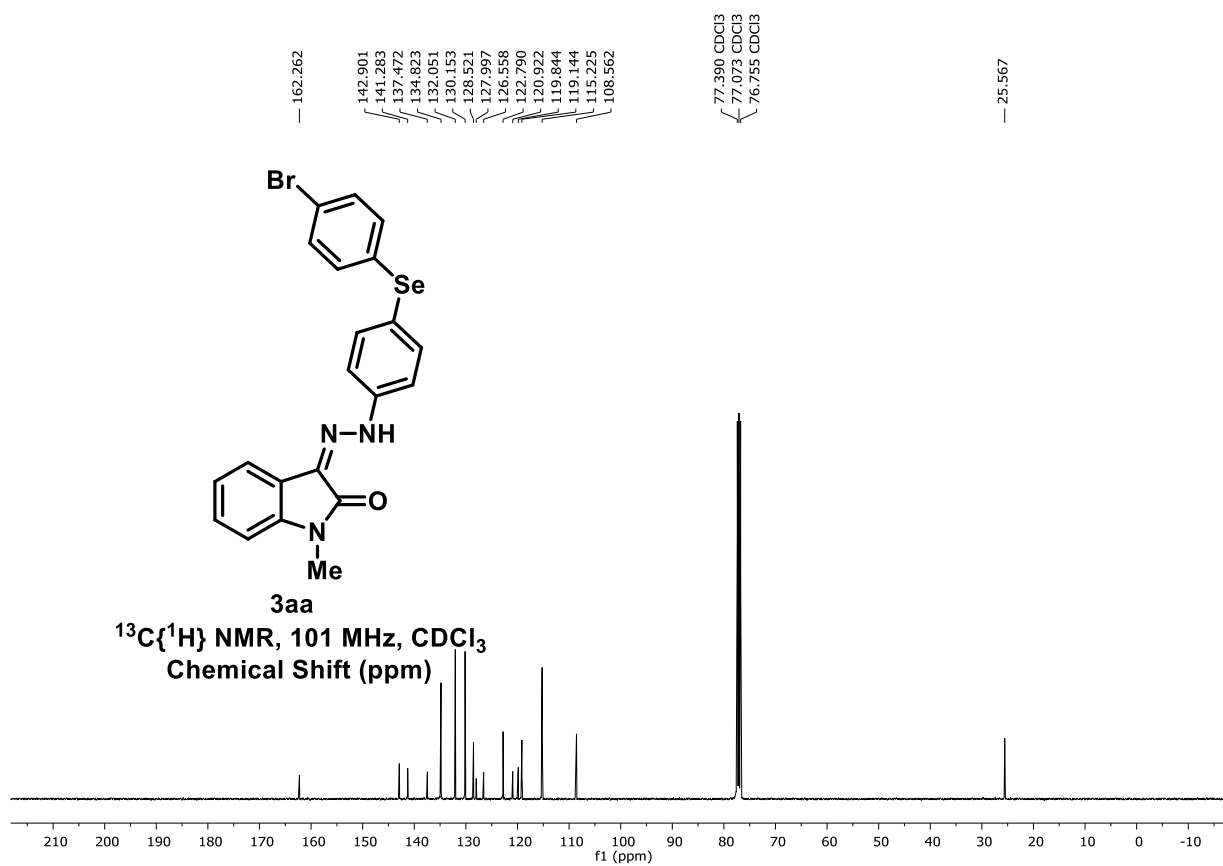

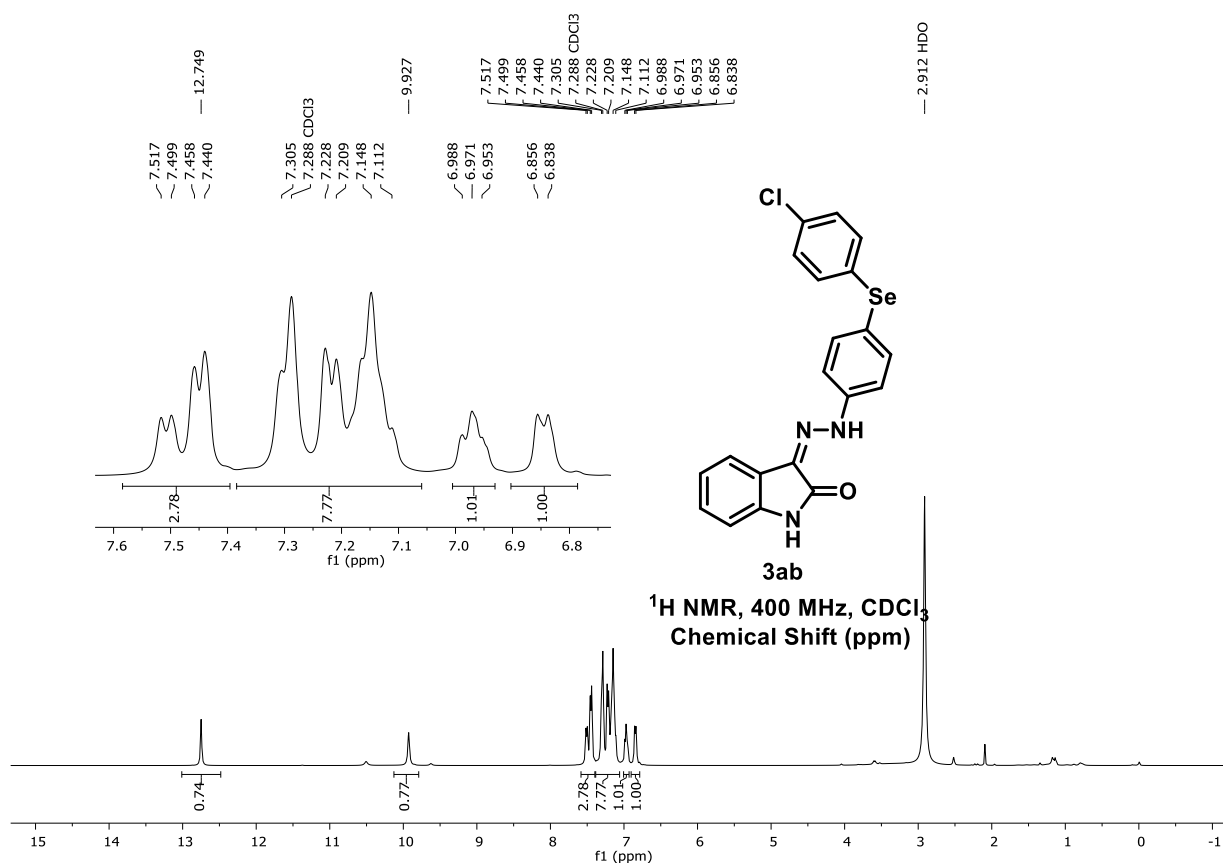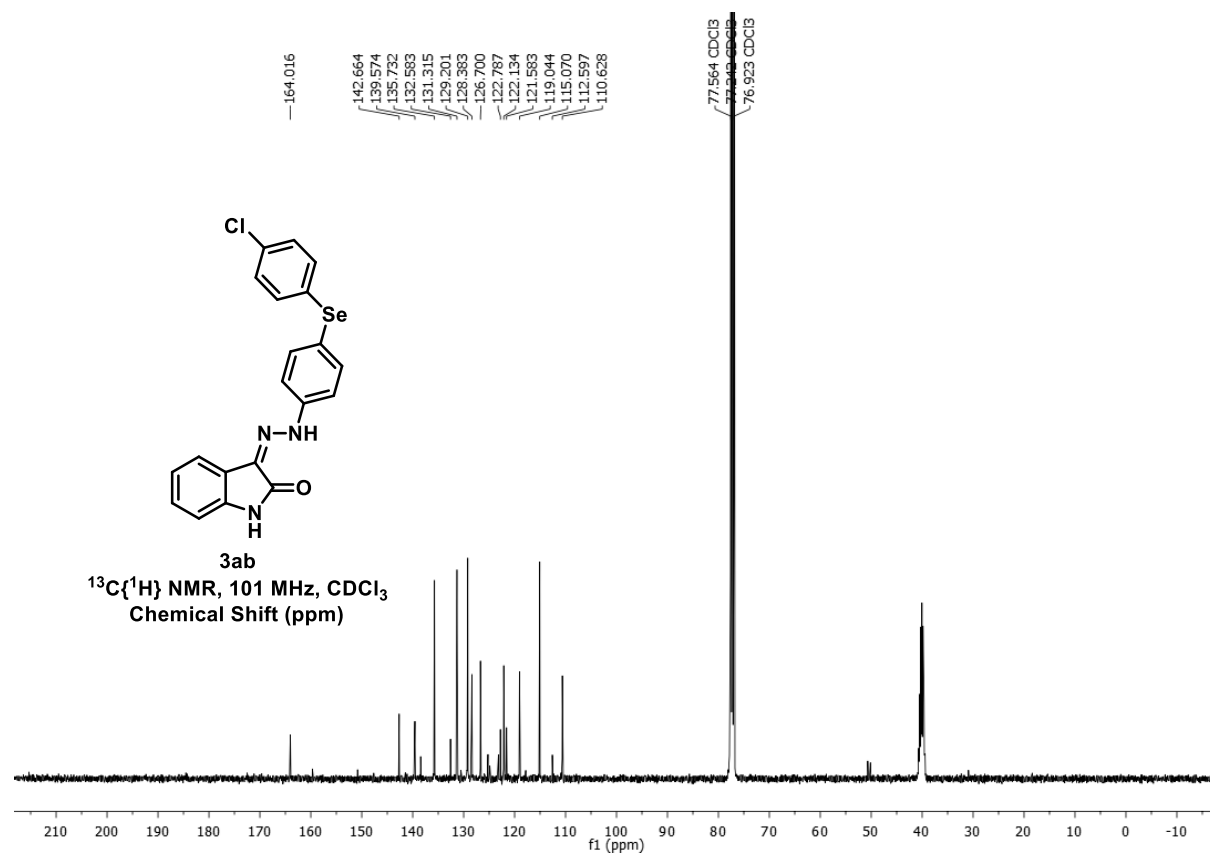

# $^1\text{H}$ and $^{13}\text{C}$ NMR Spectra of compounds 4a-v:

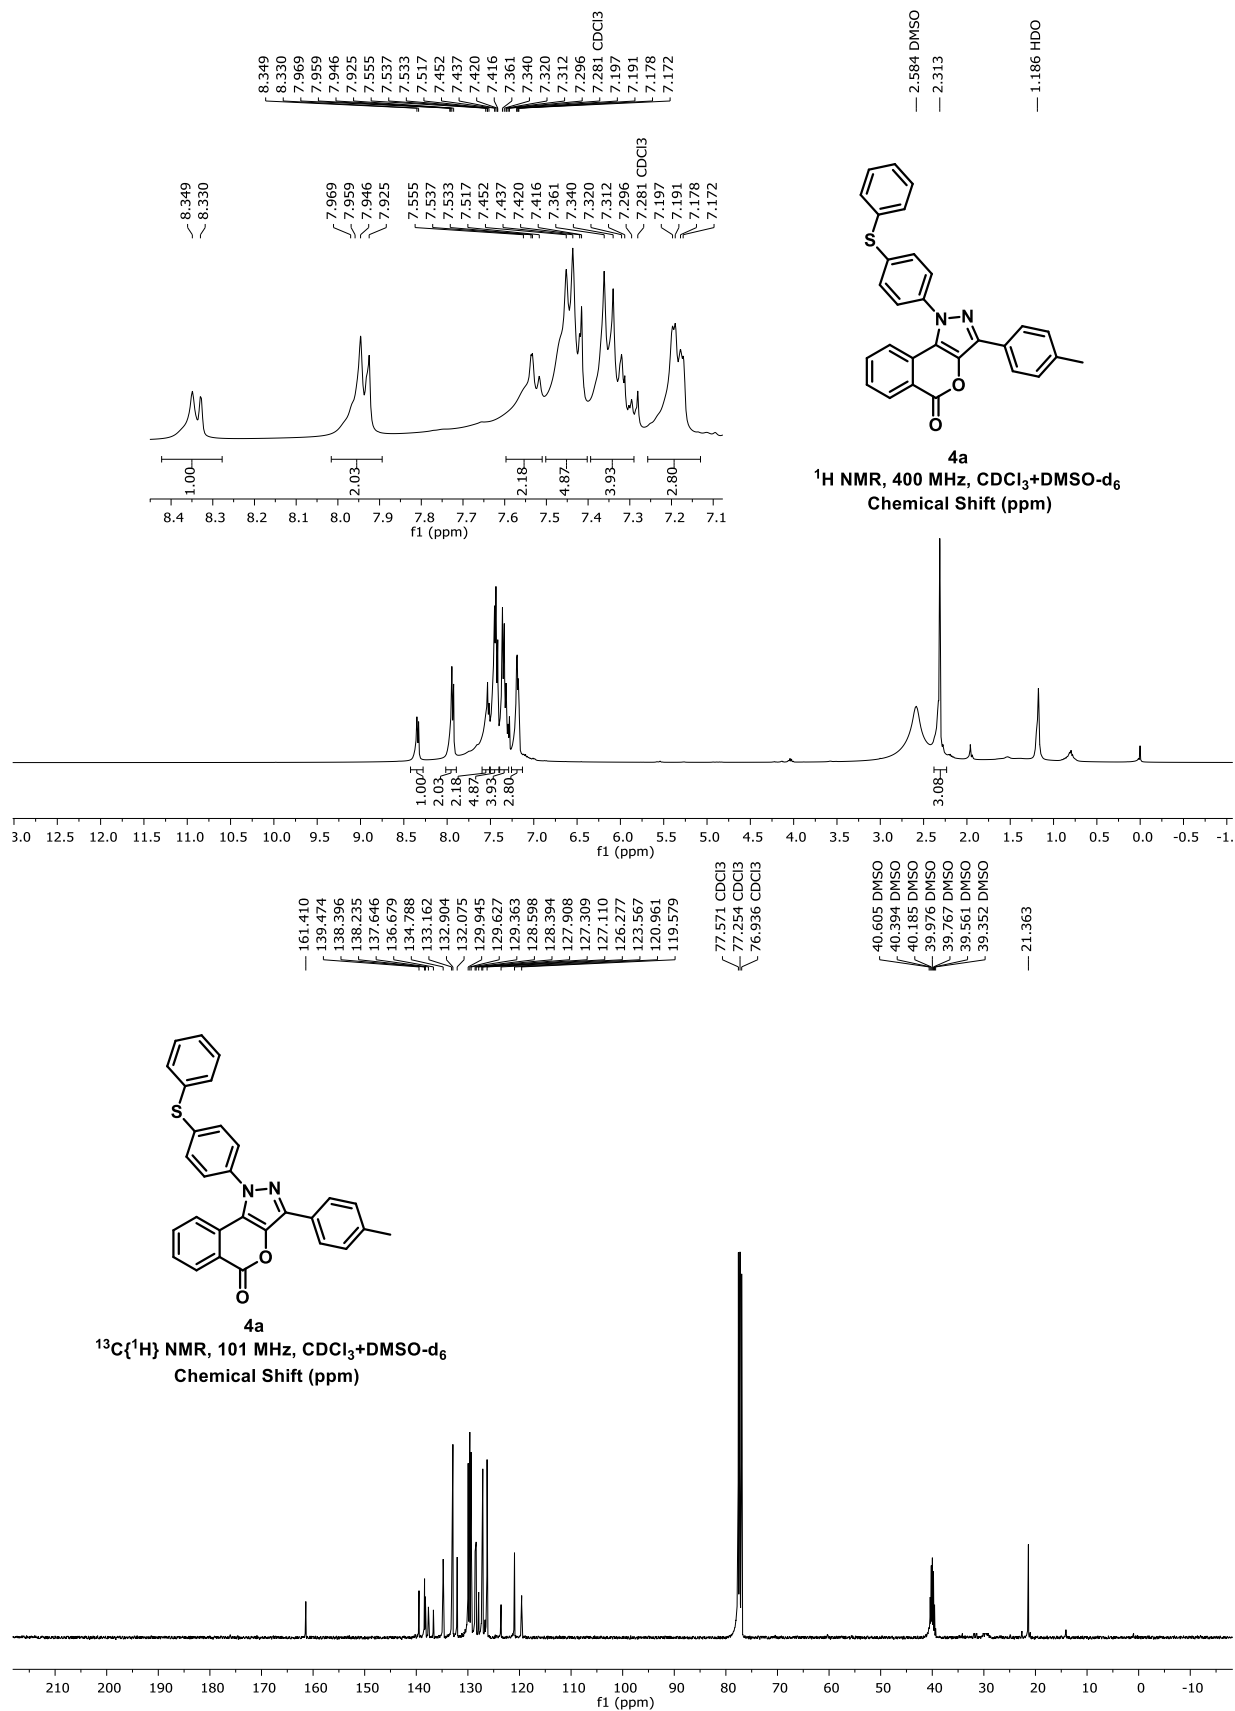

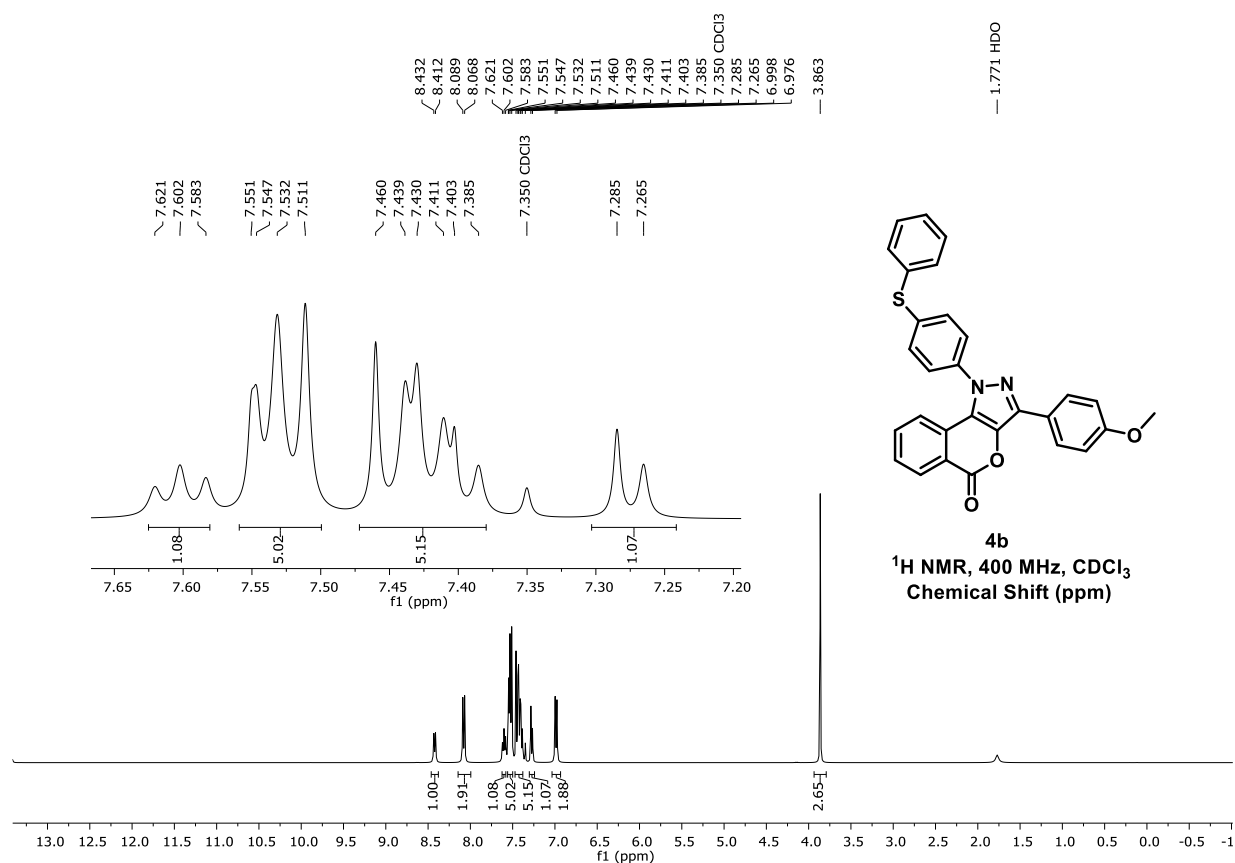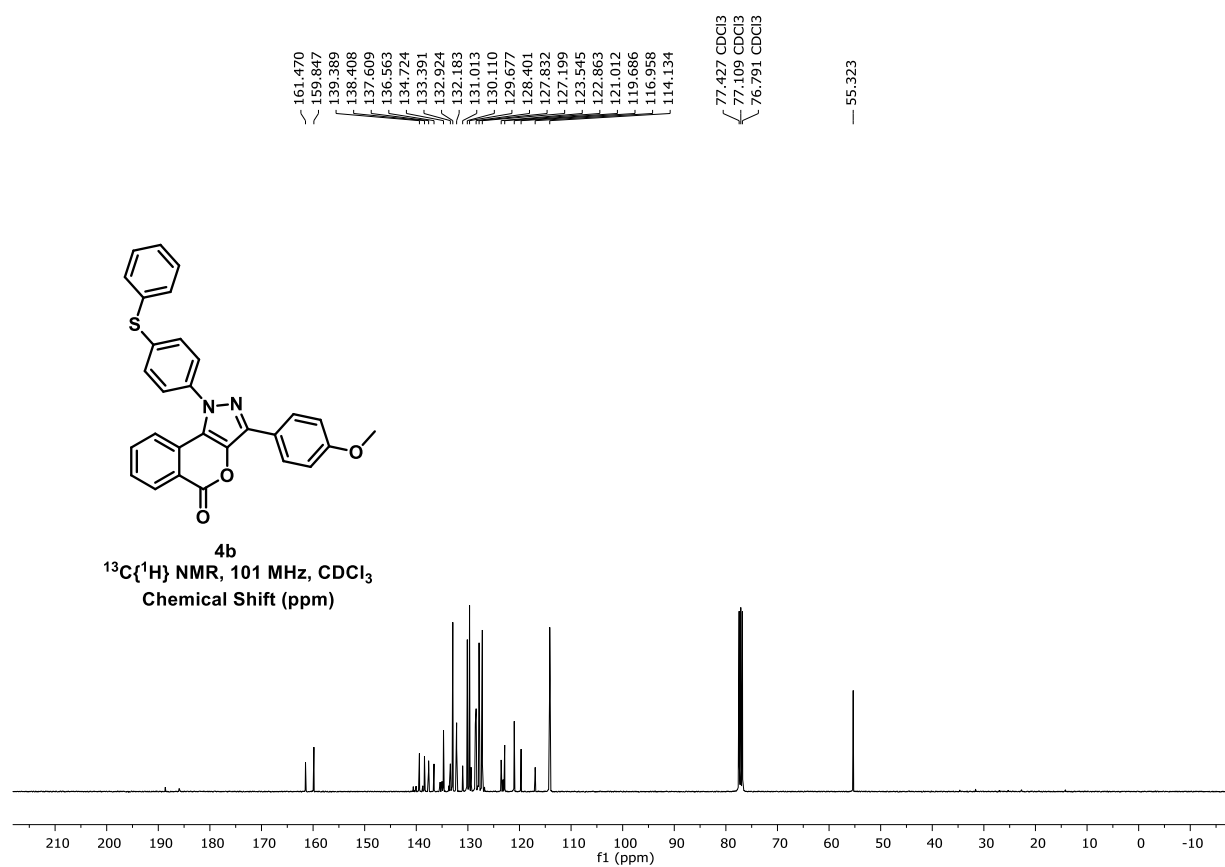

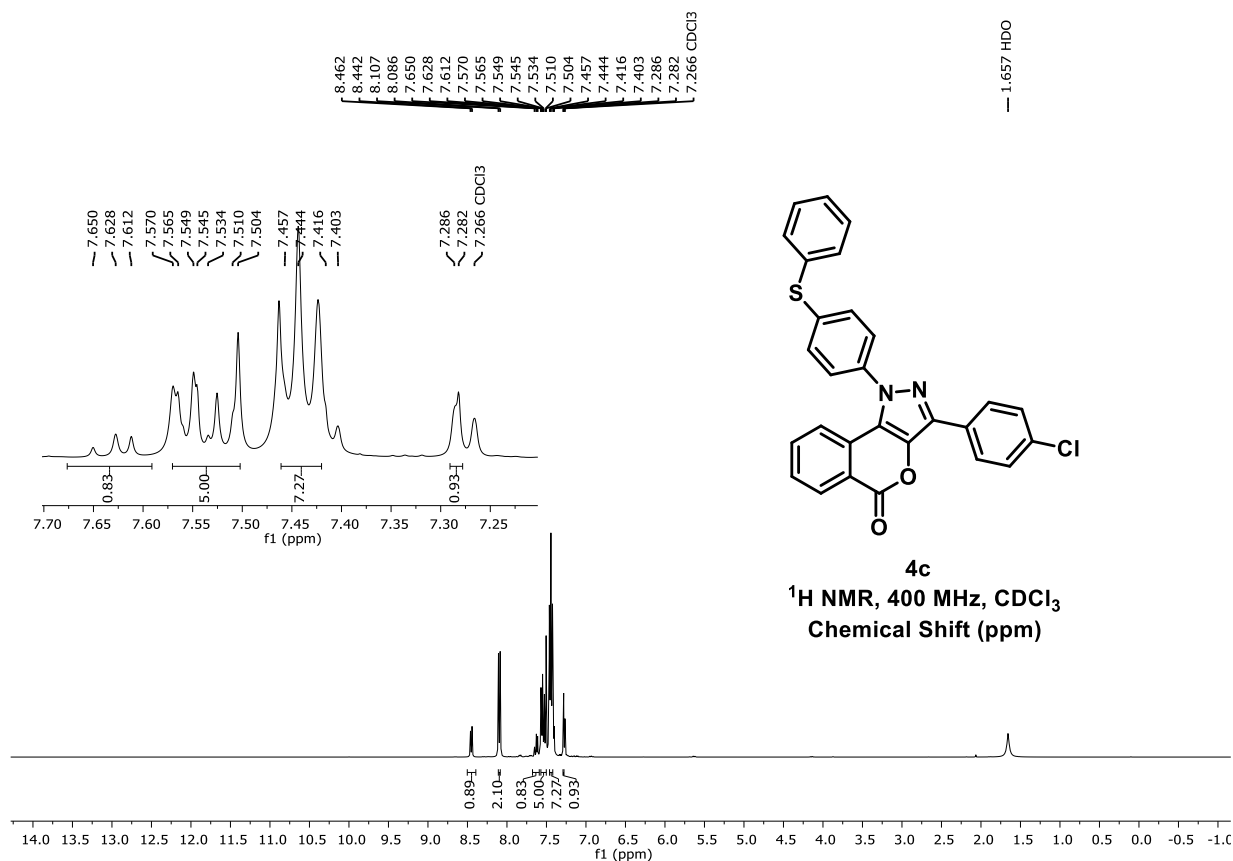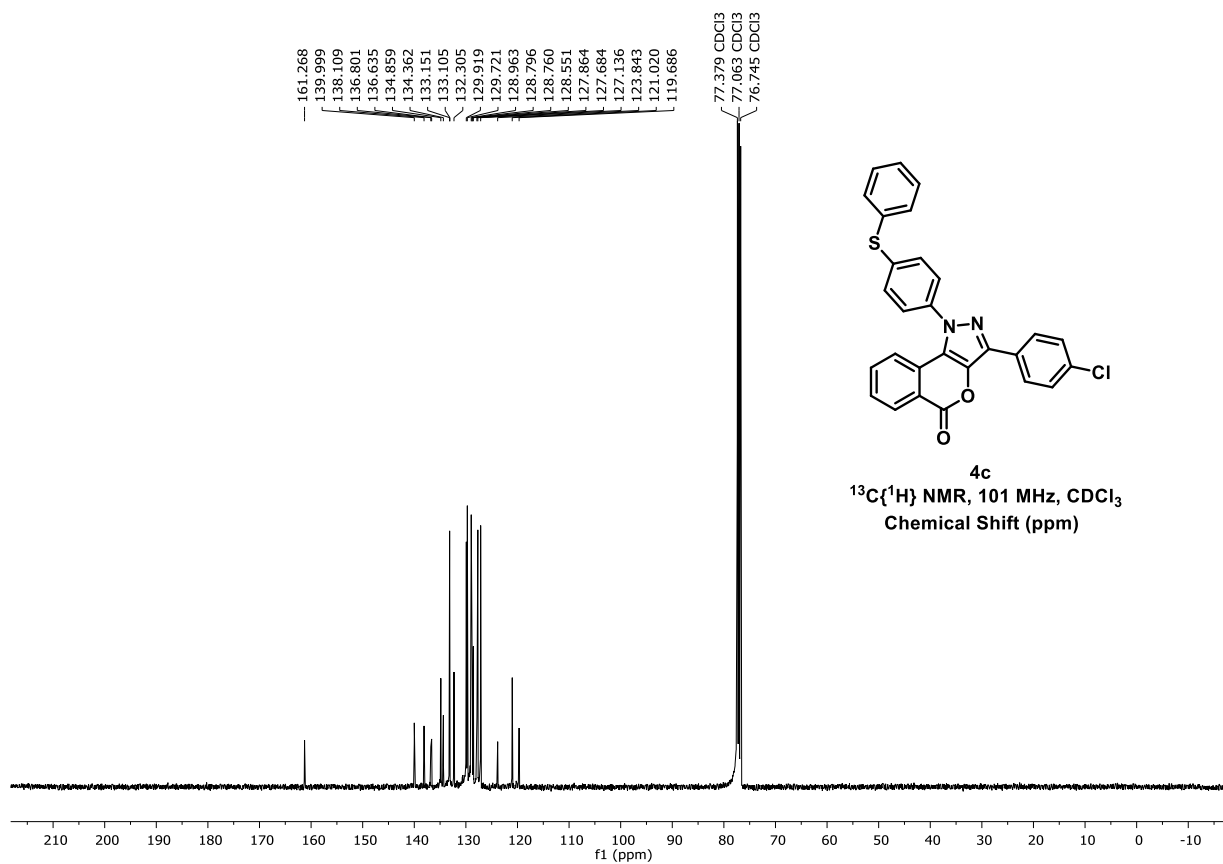



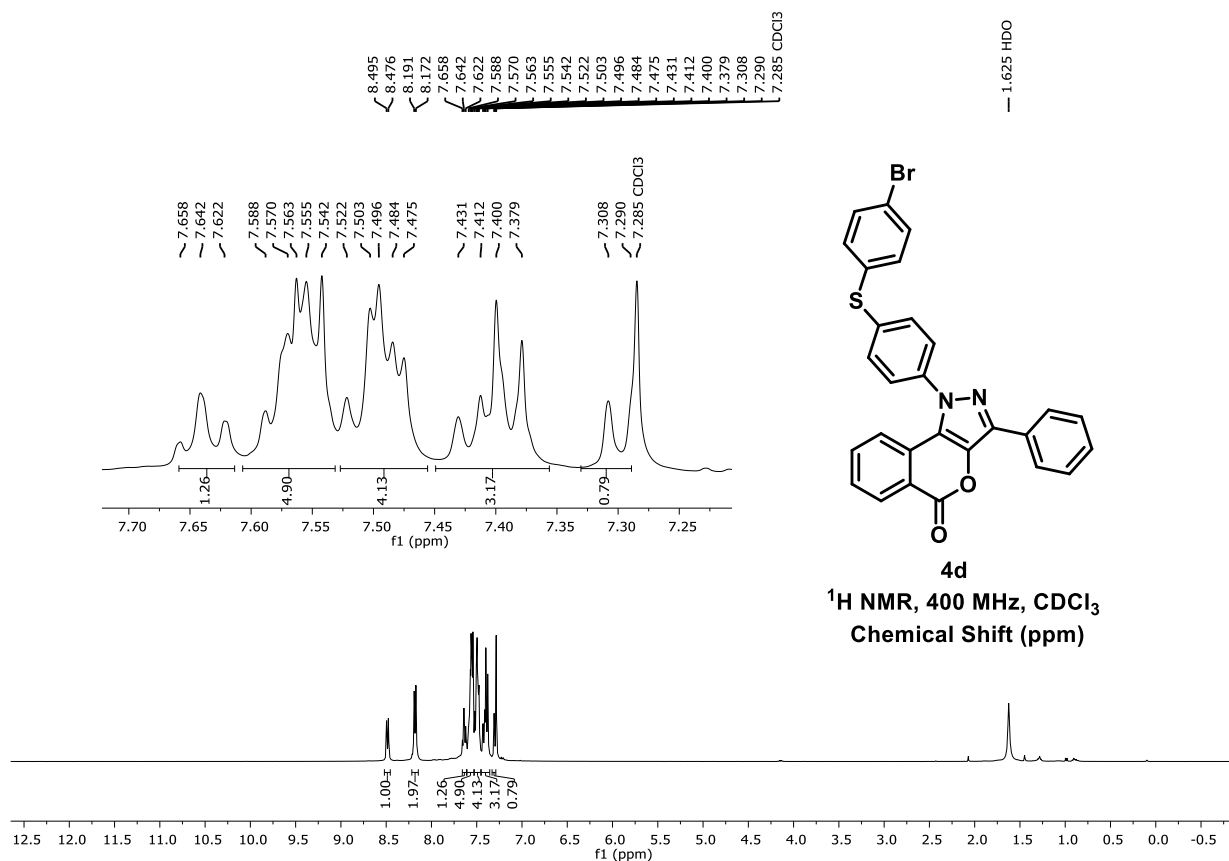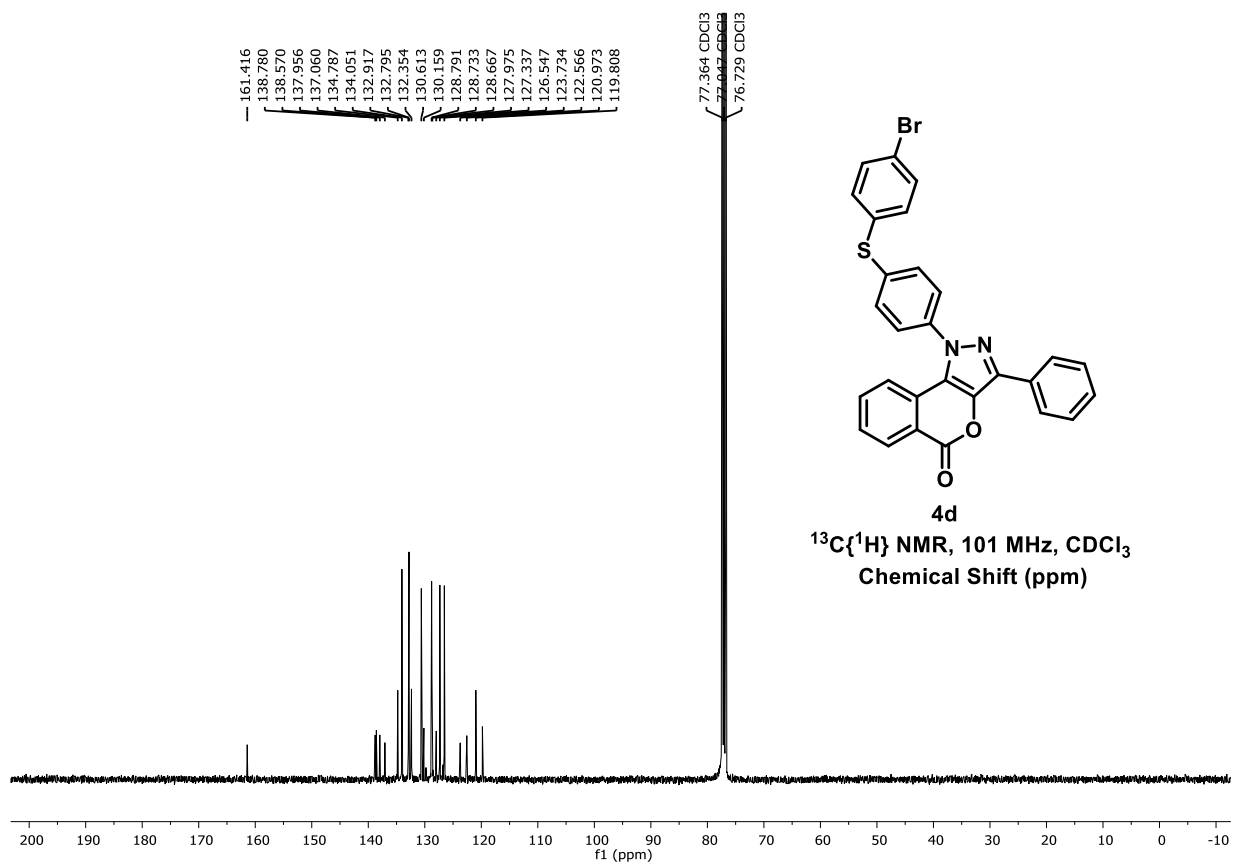

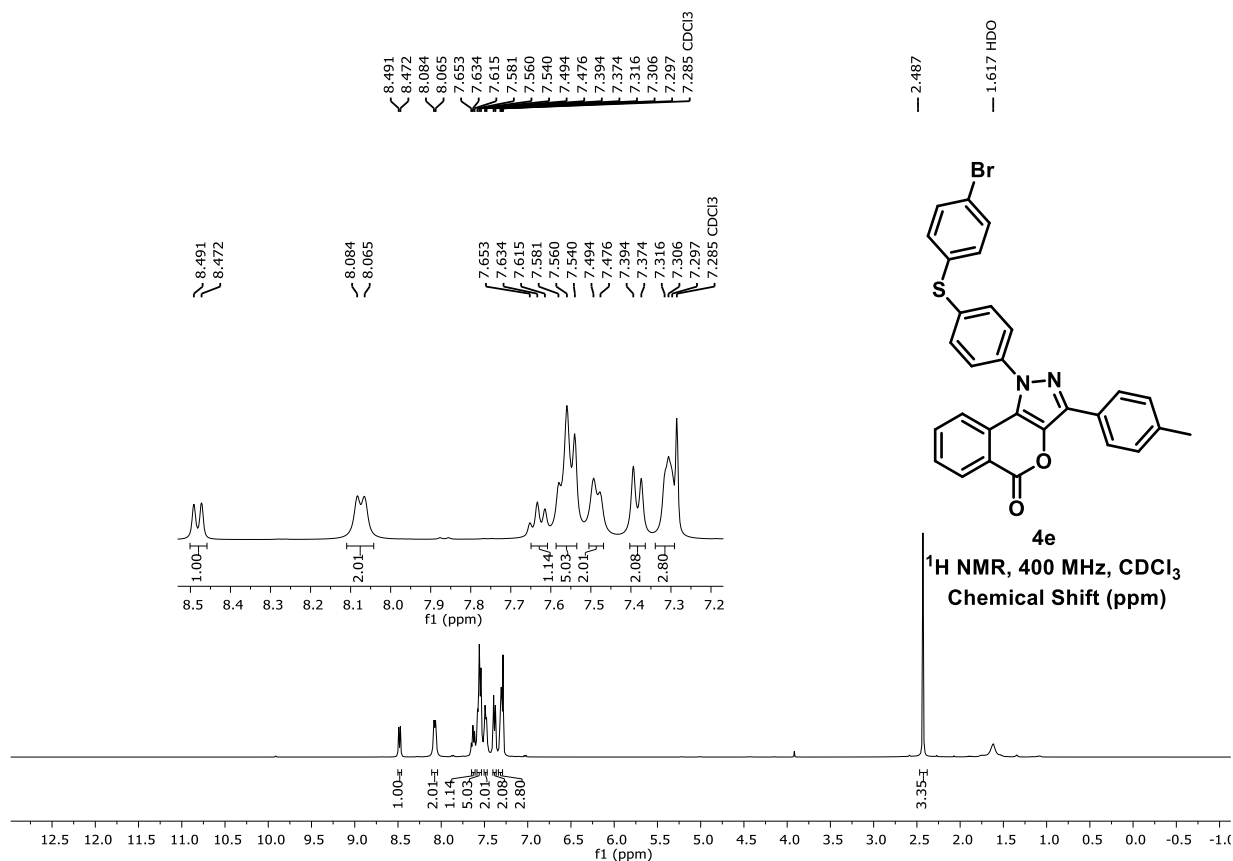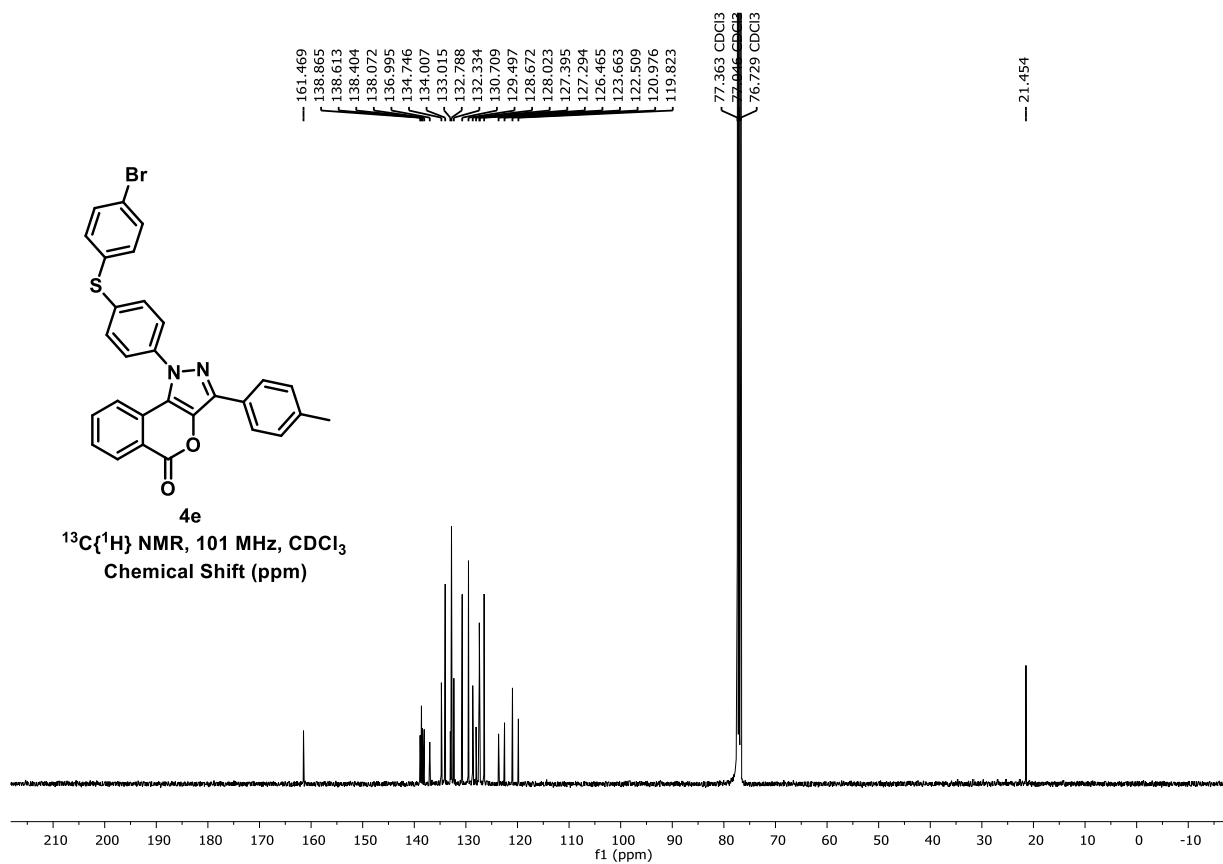

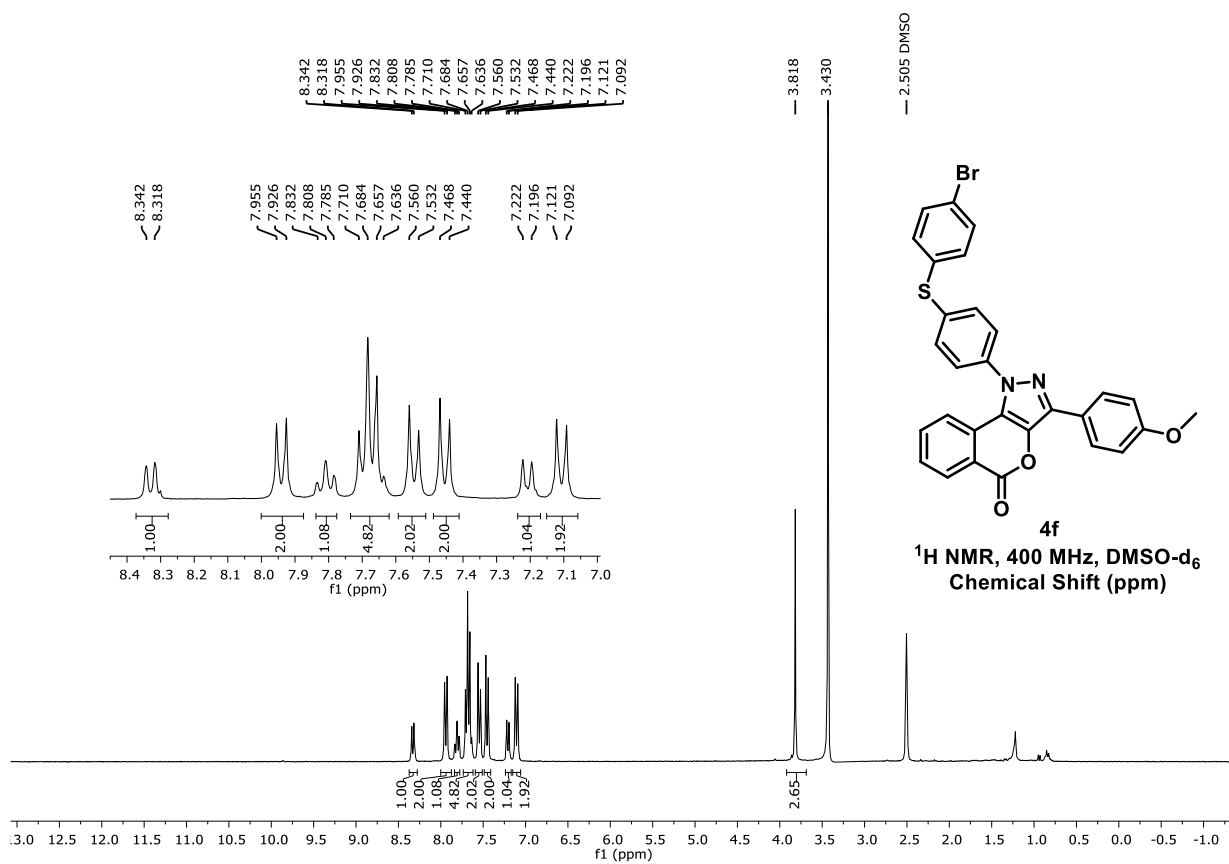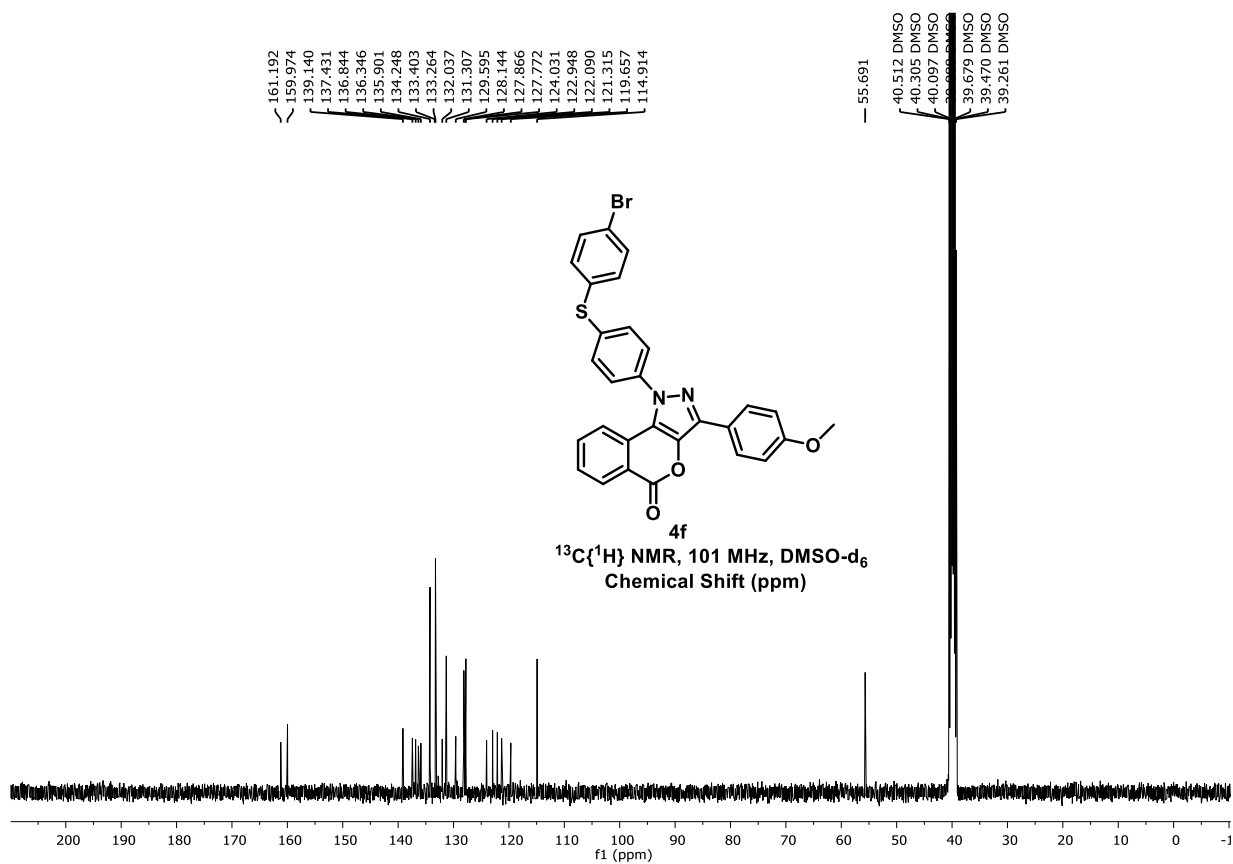

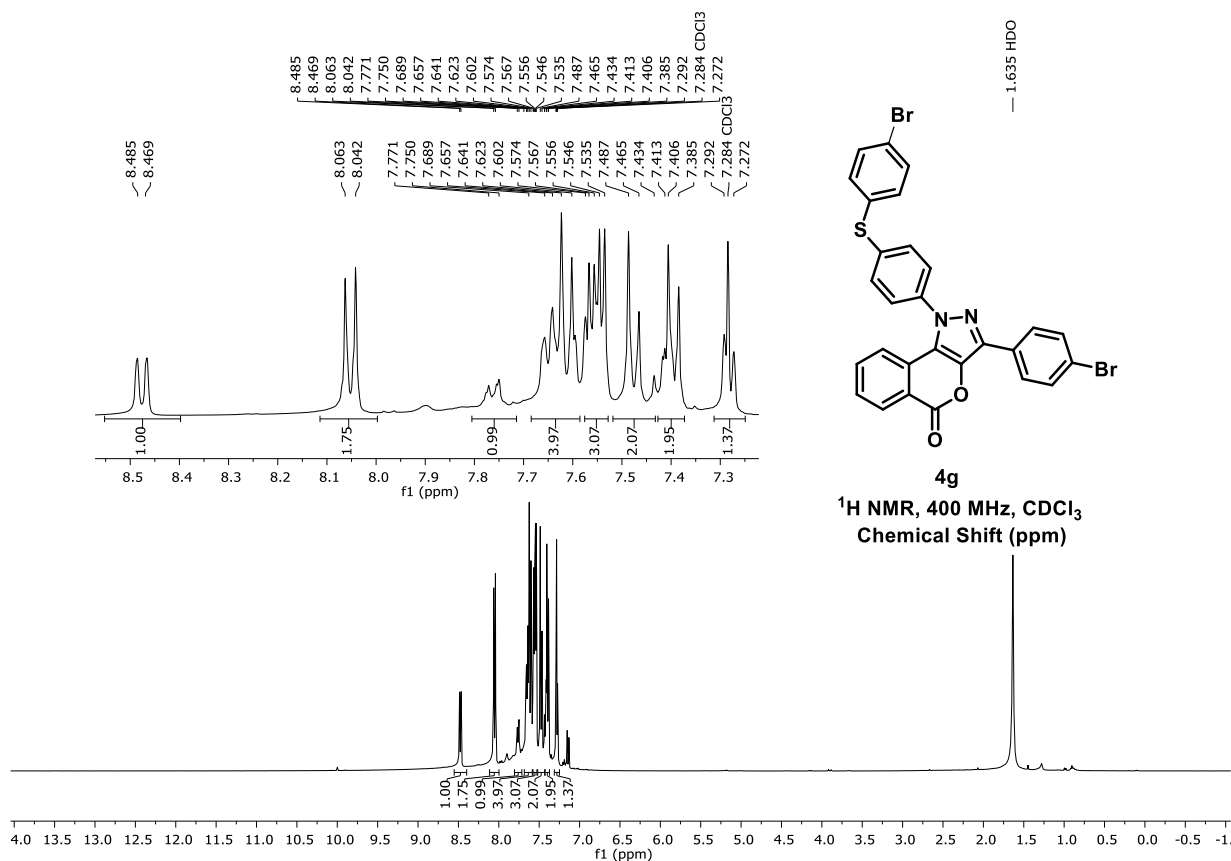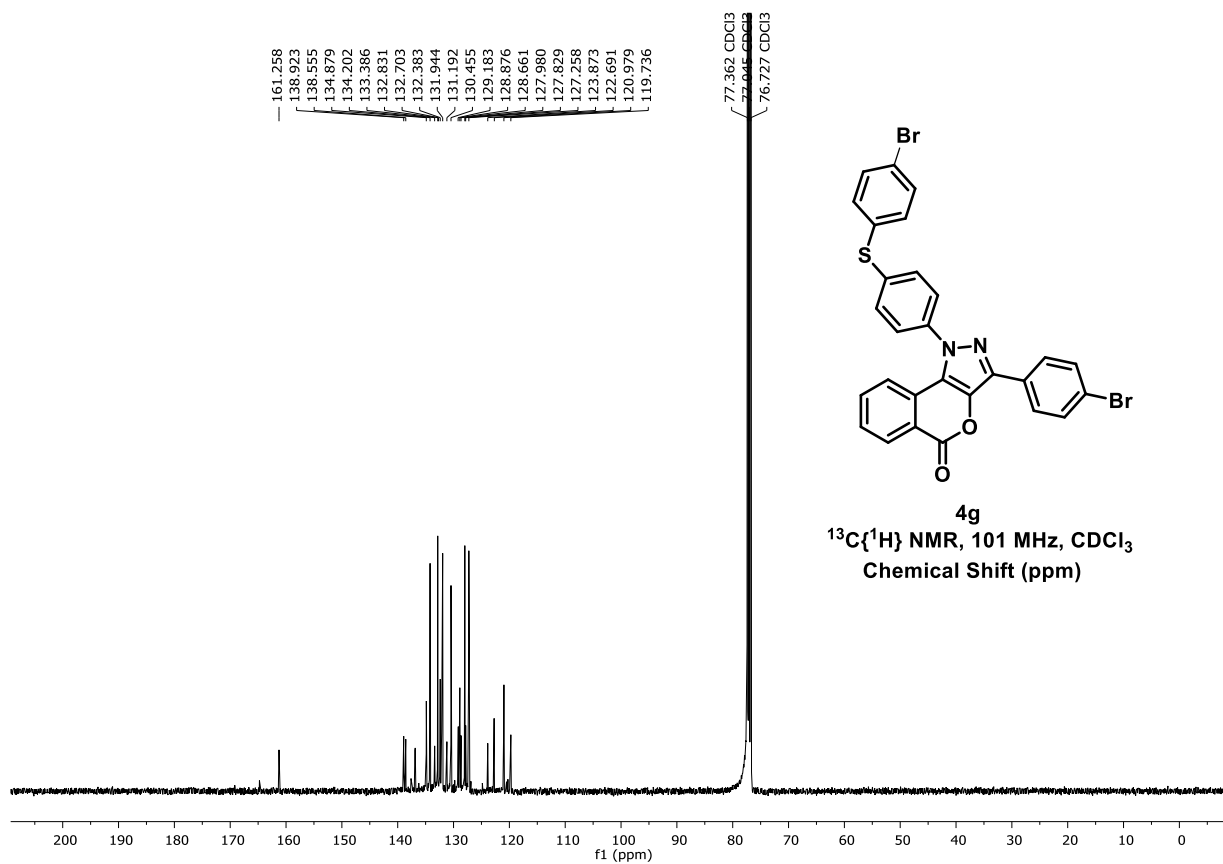

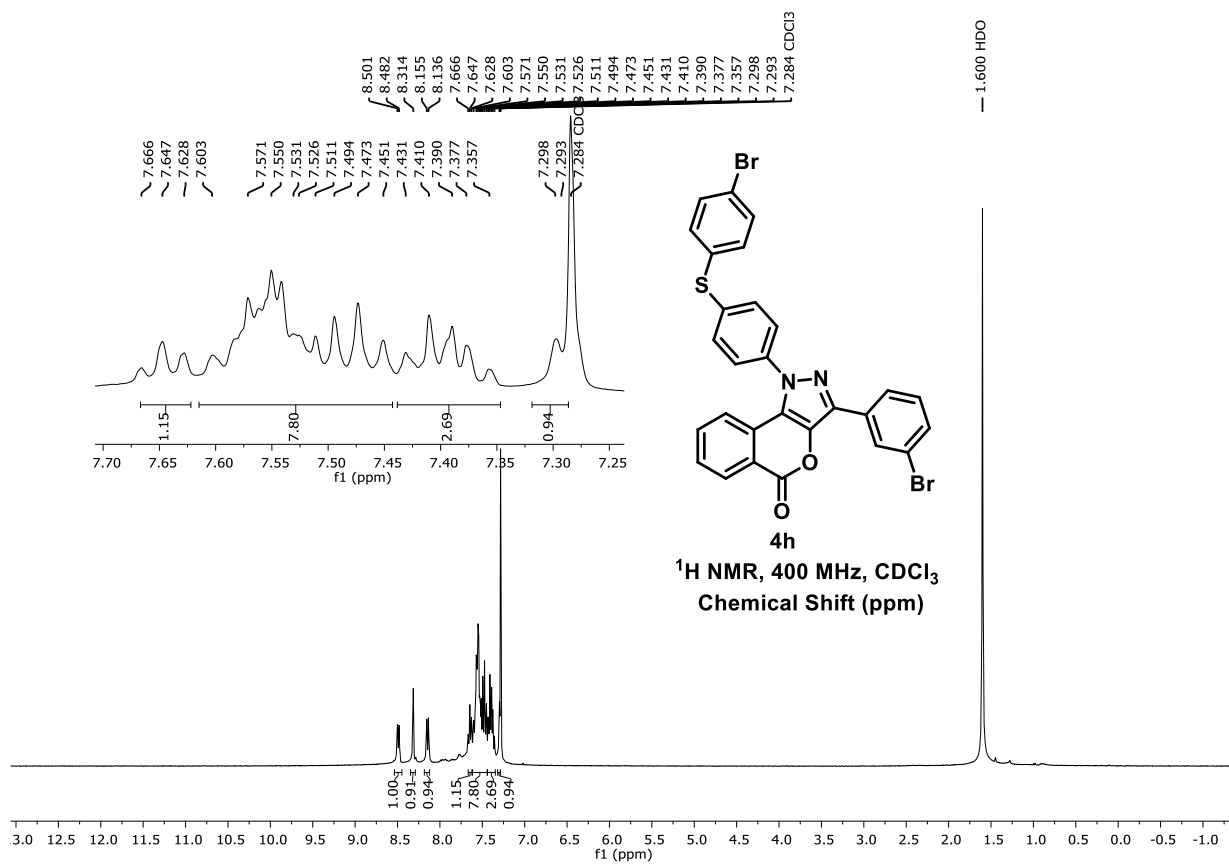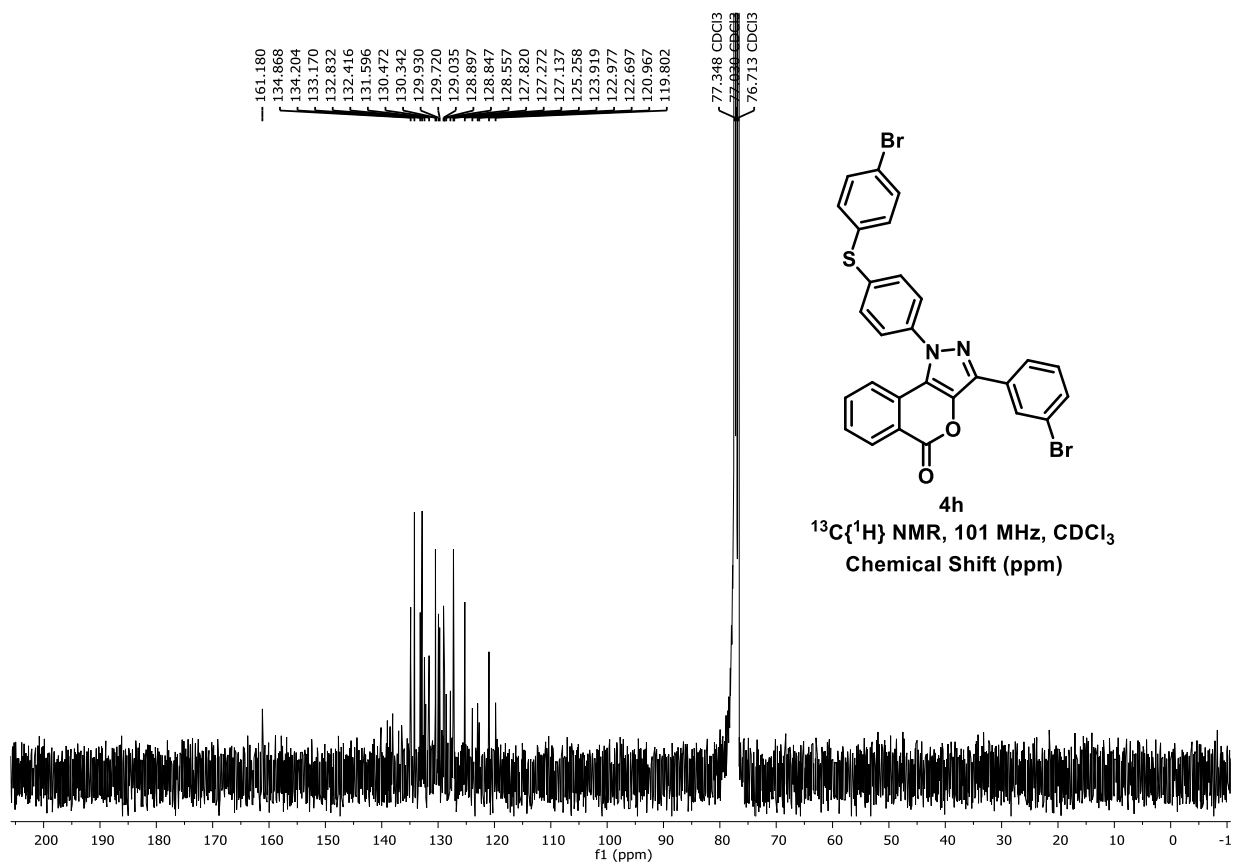

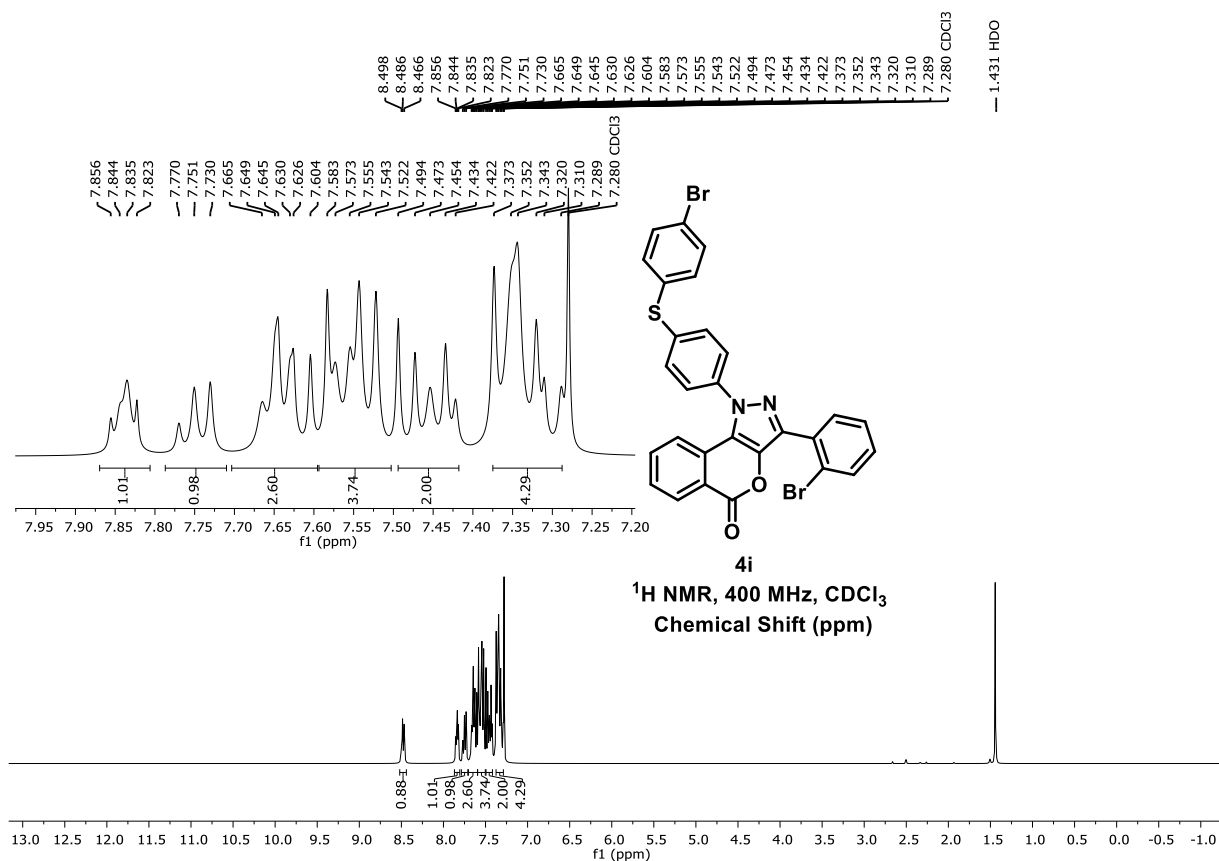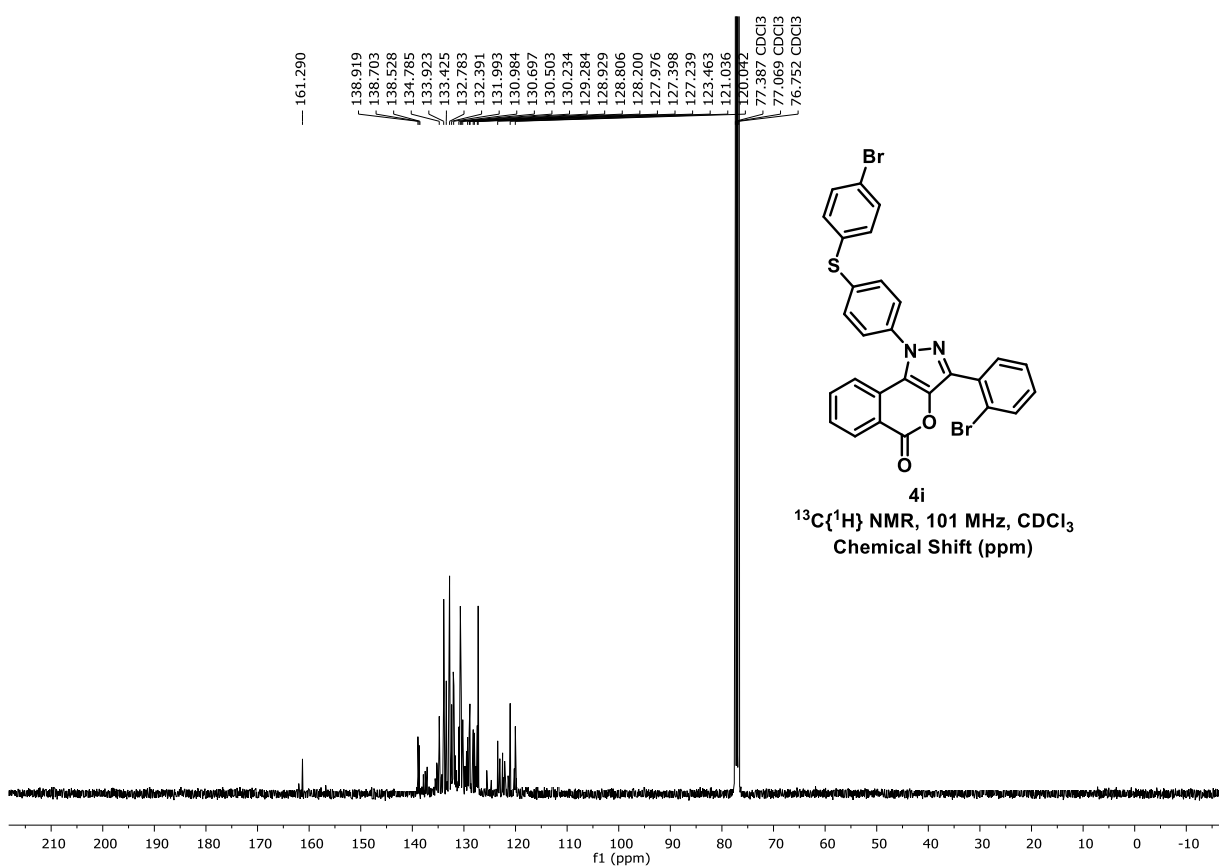

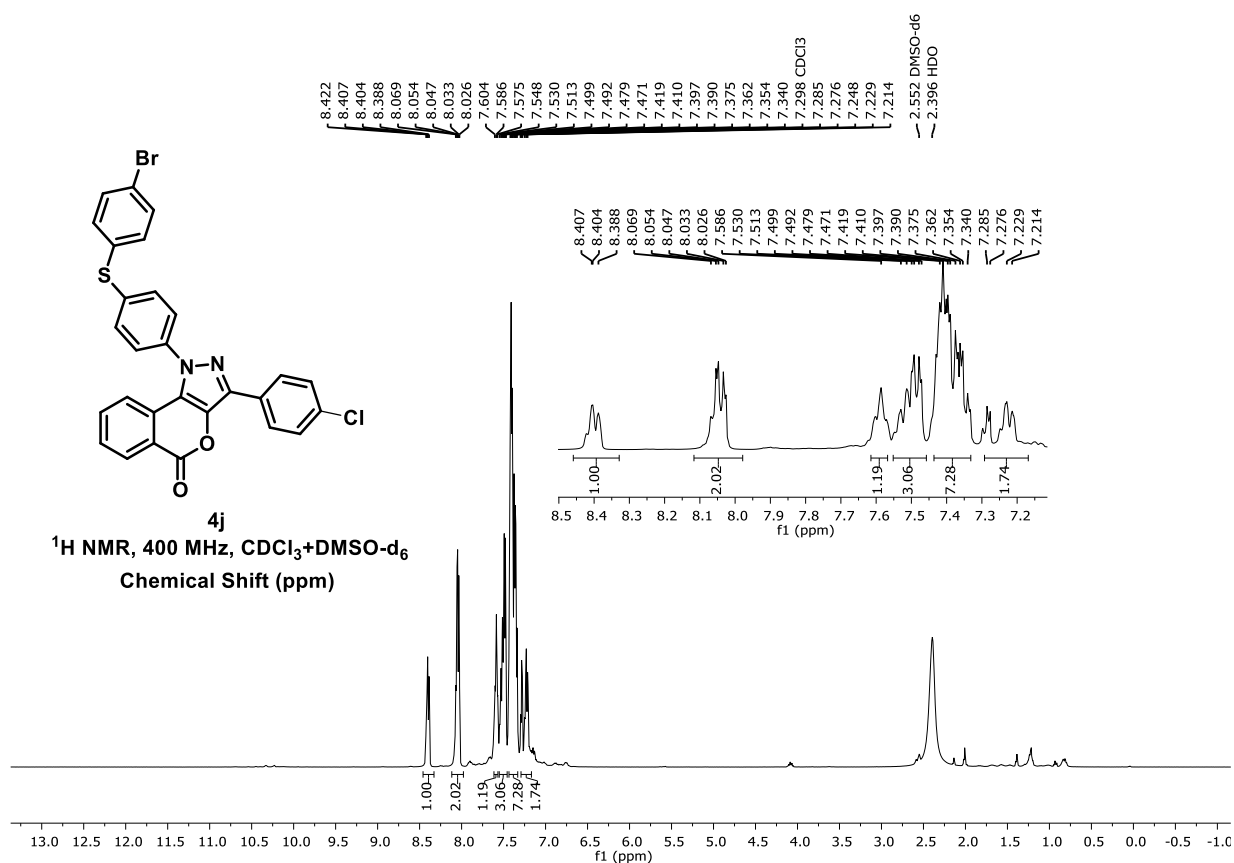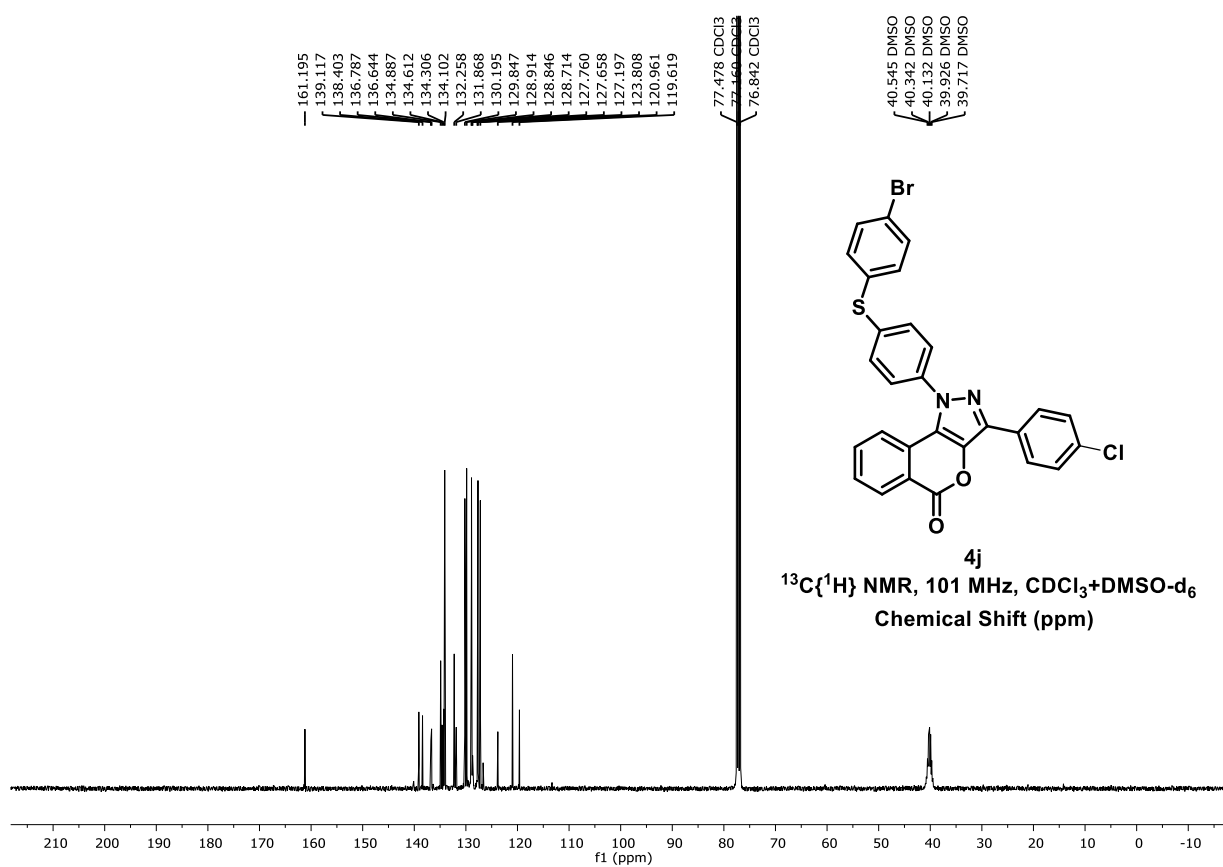

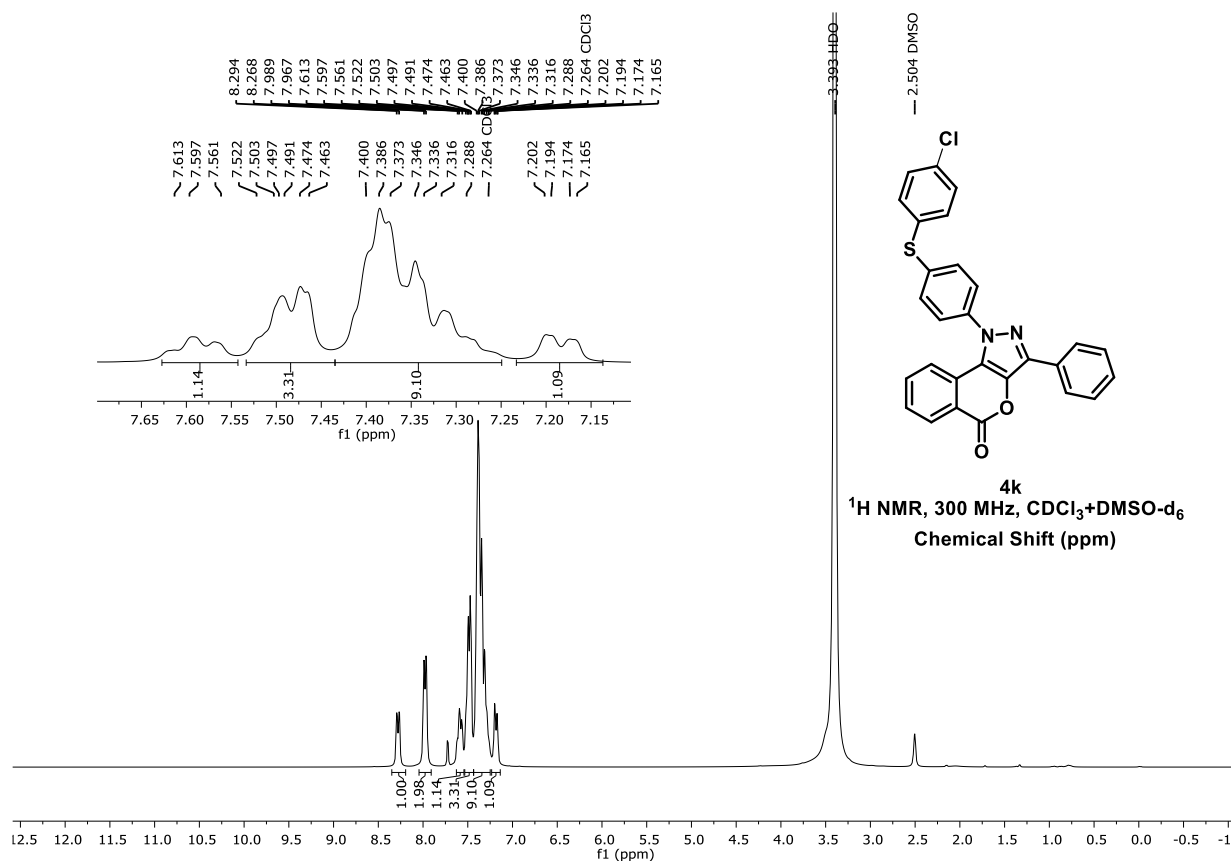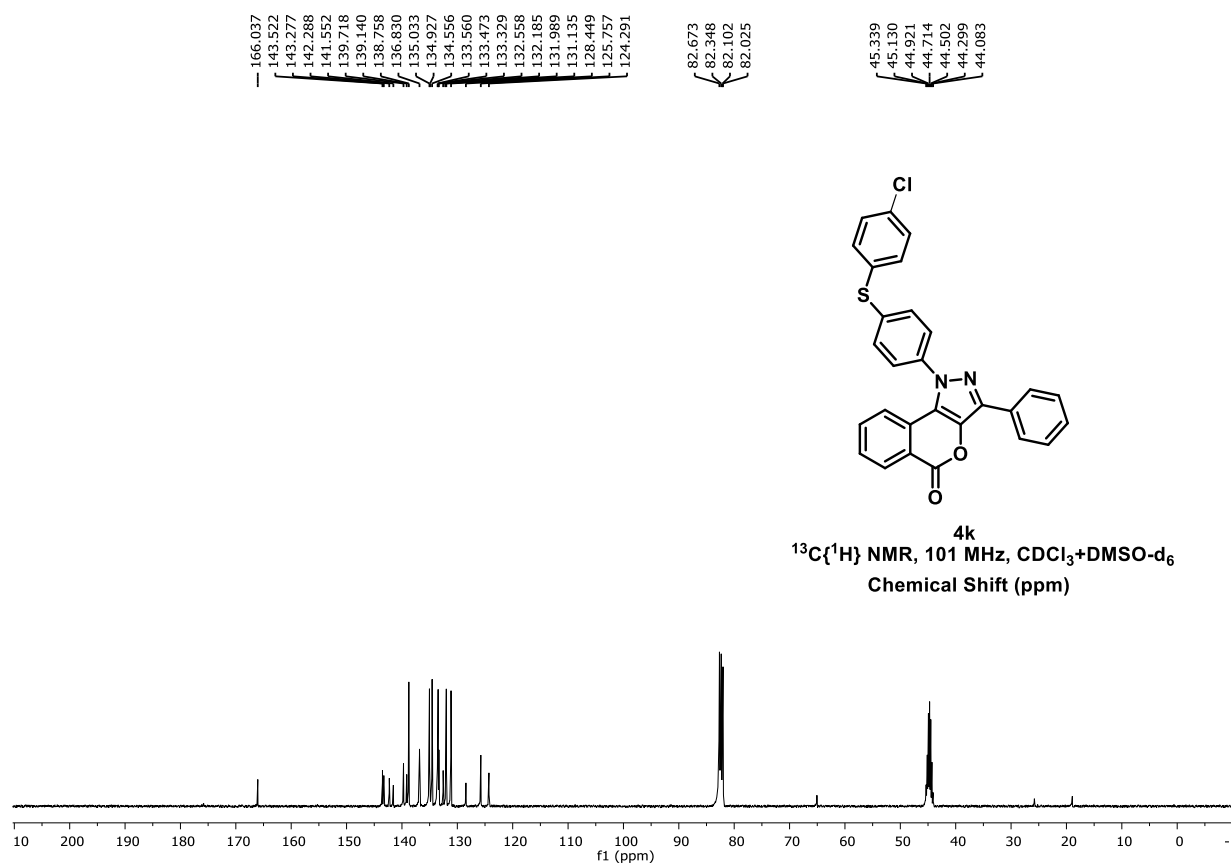



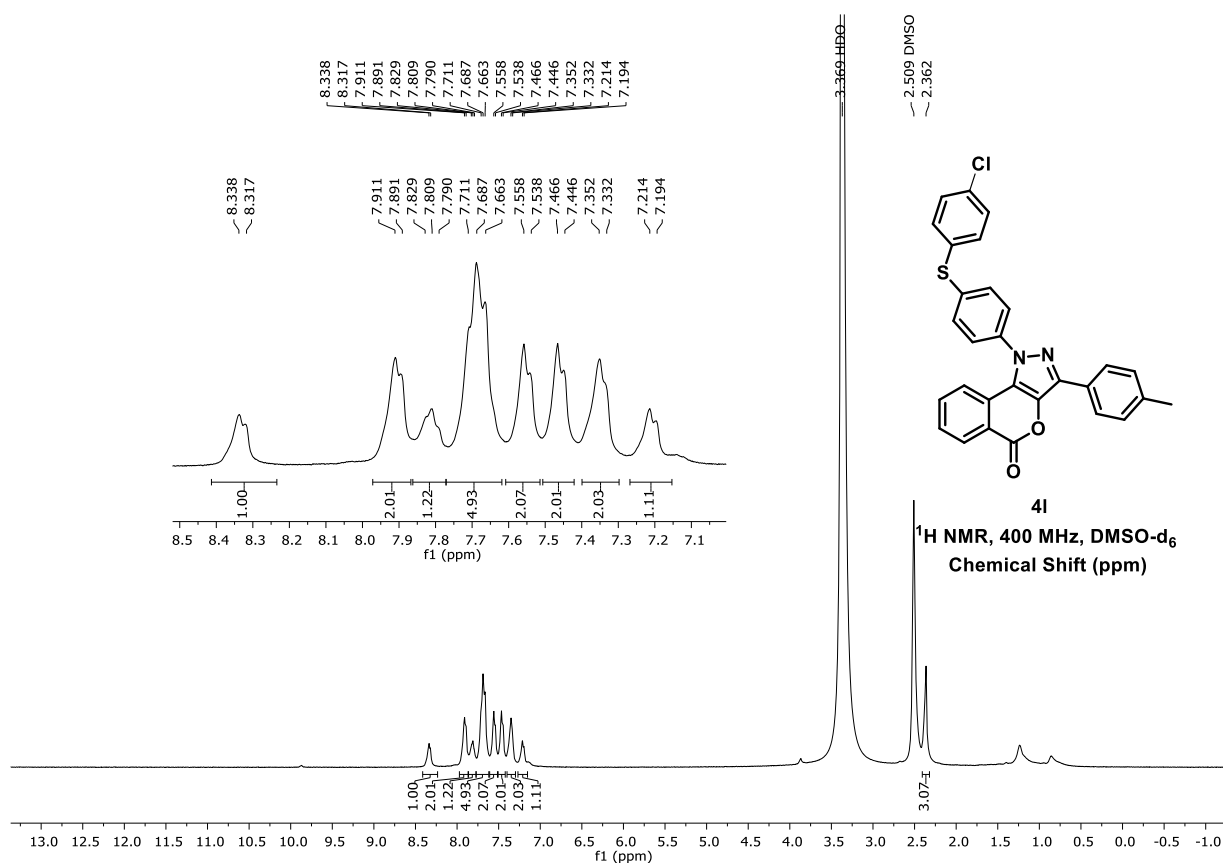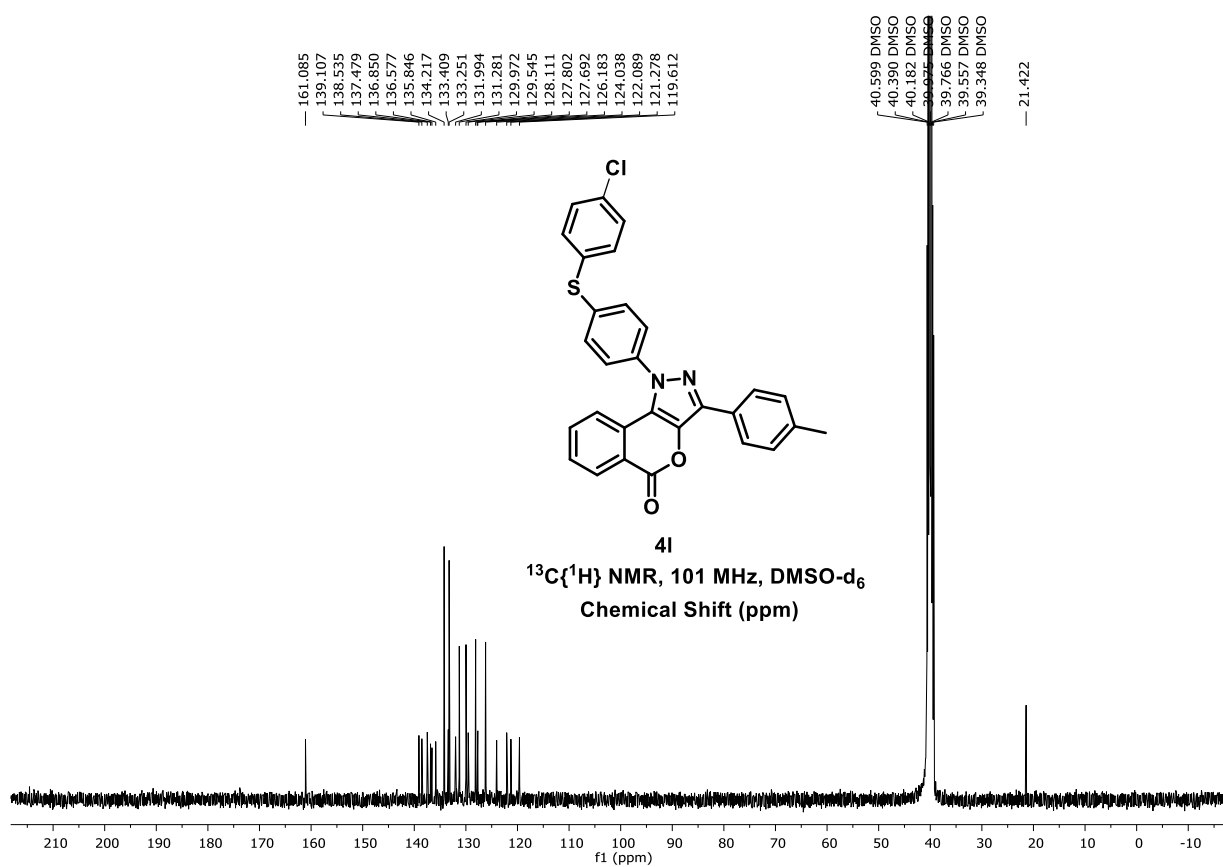

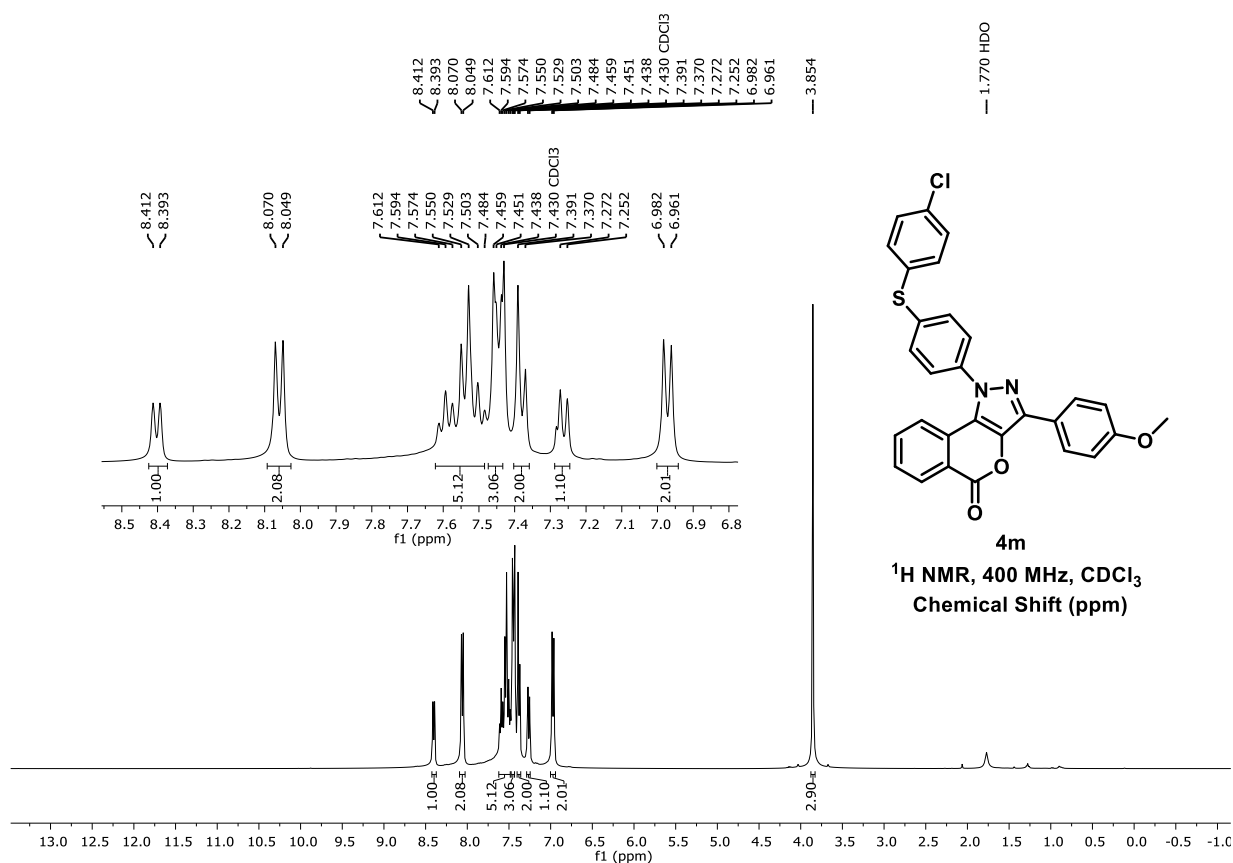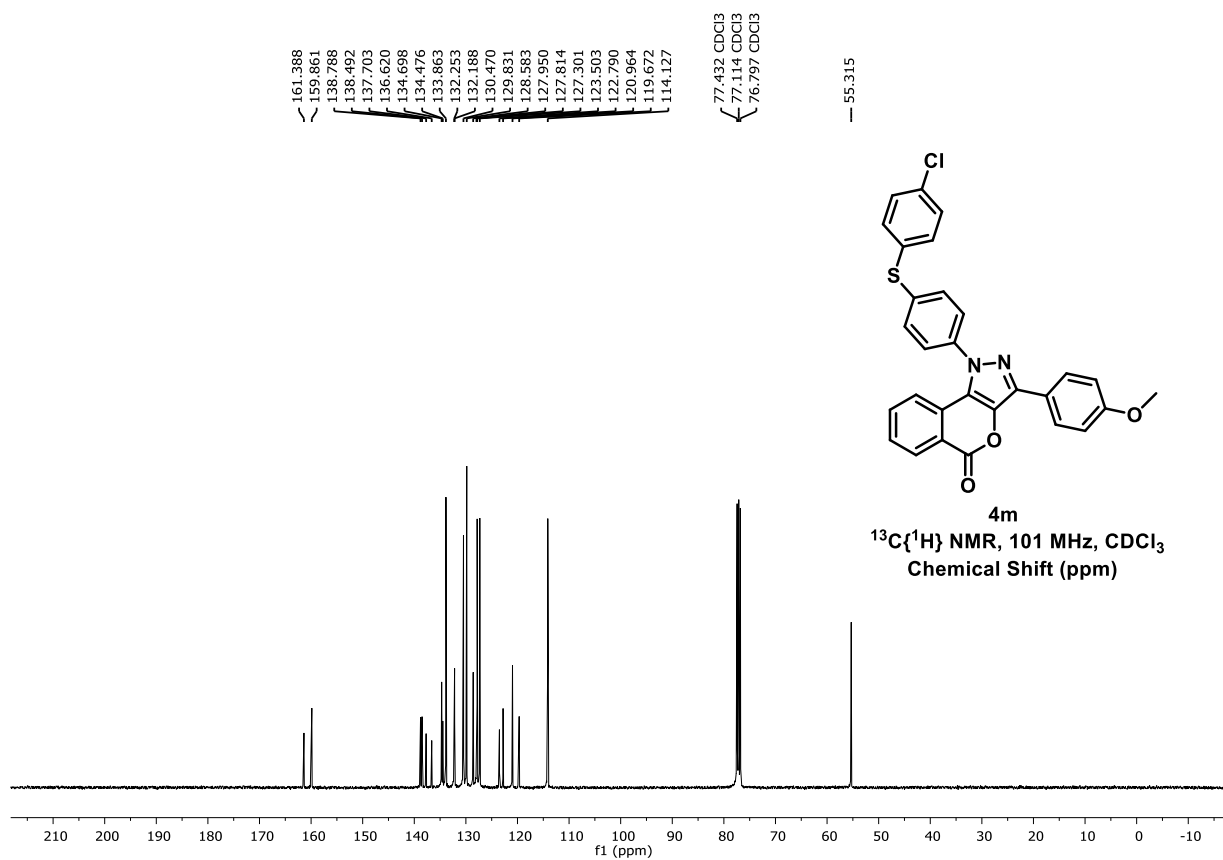

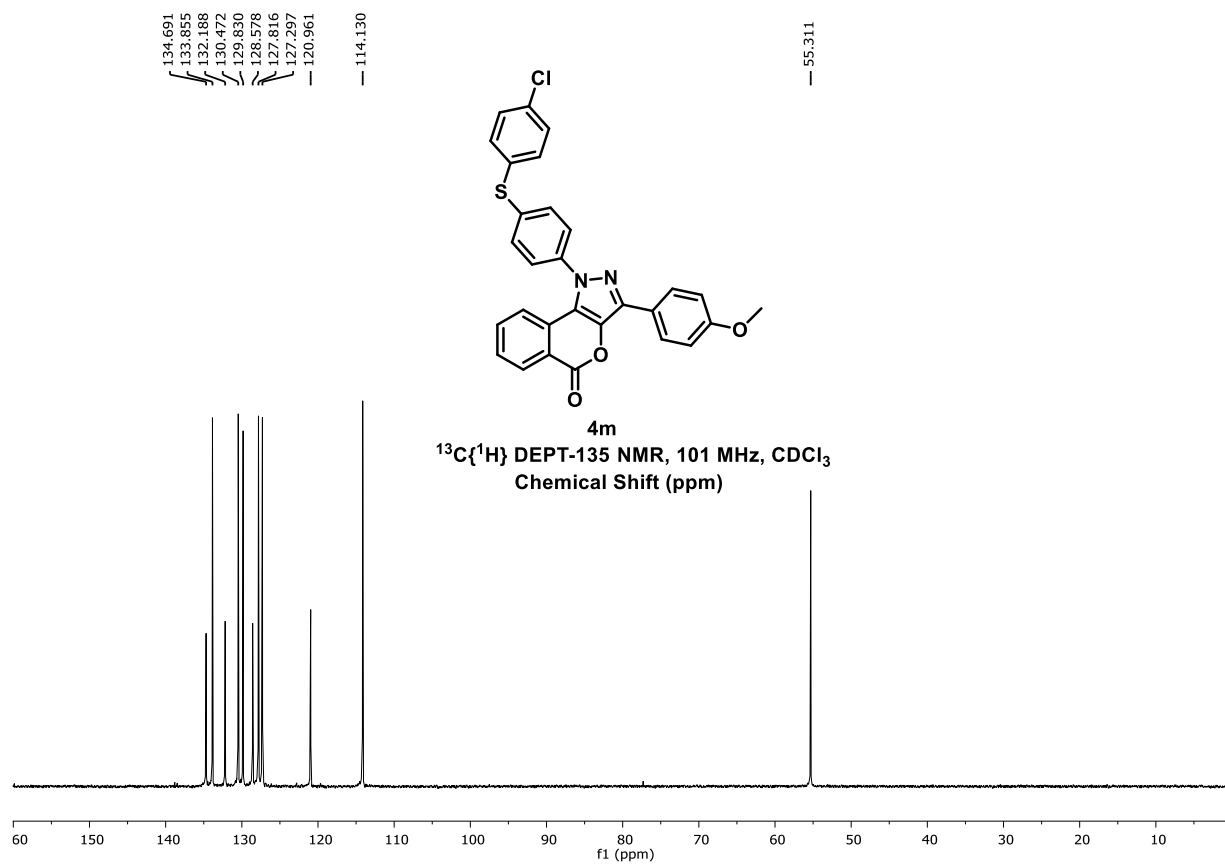

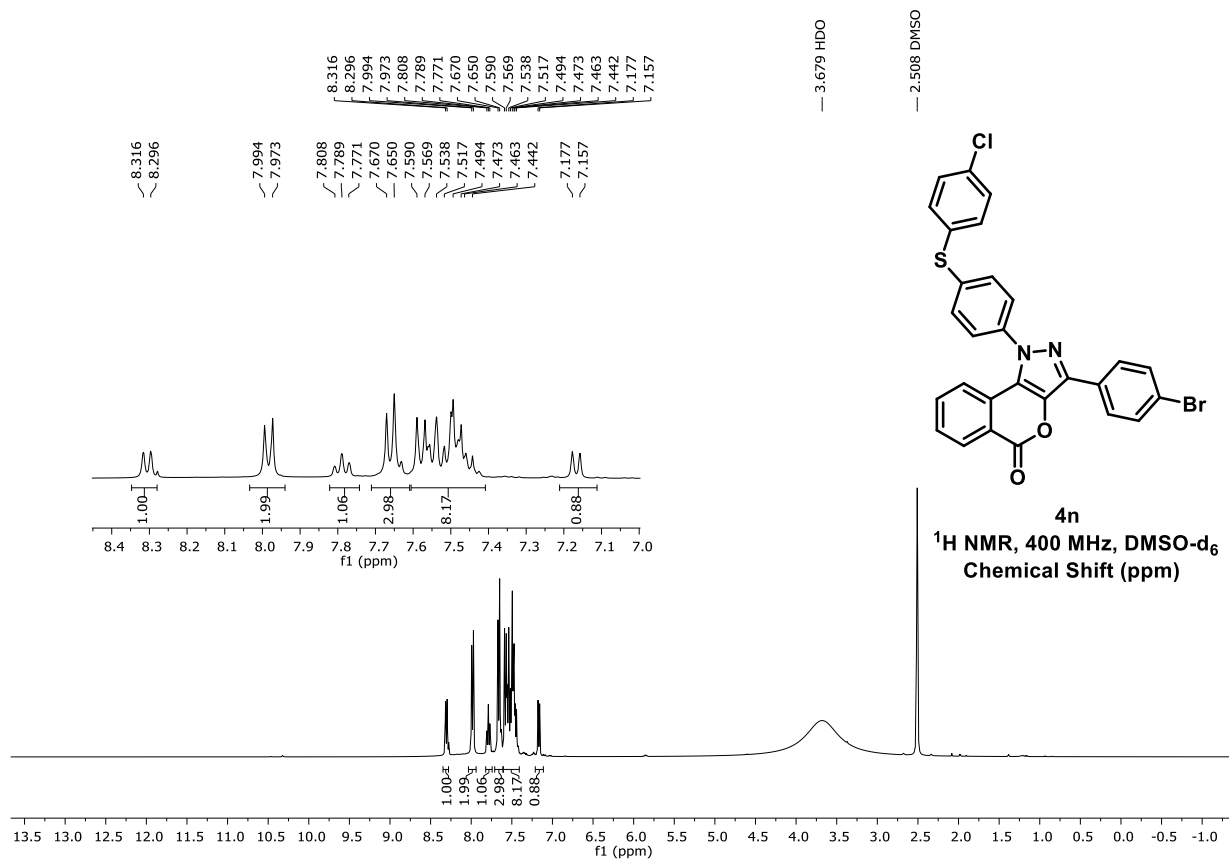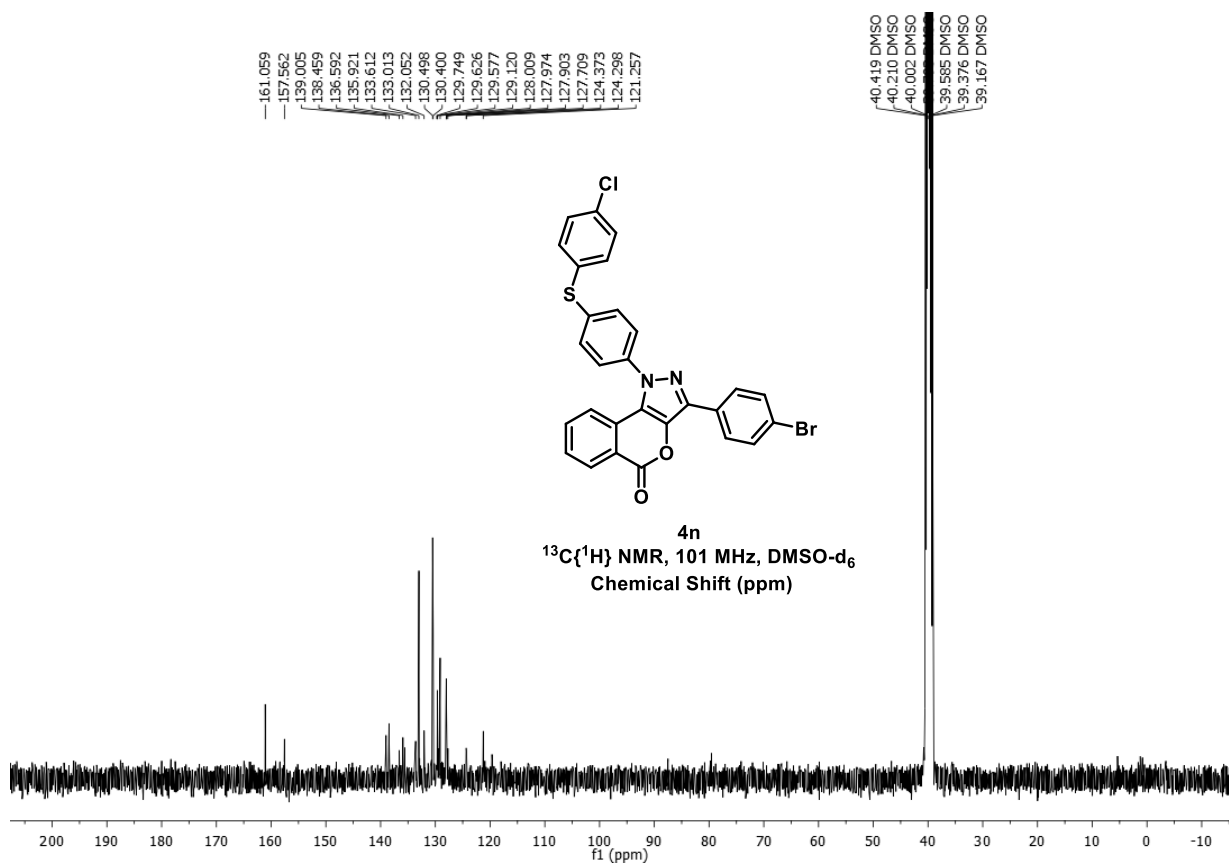

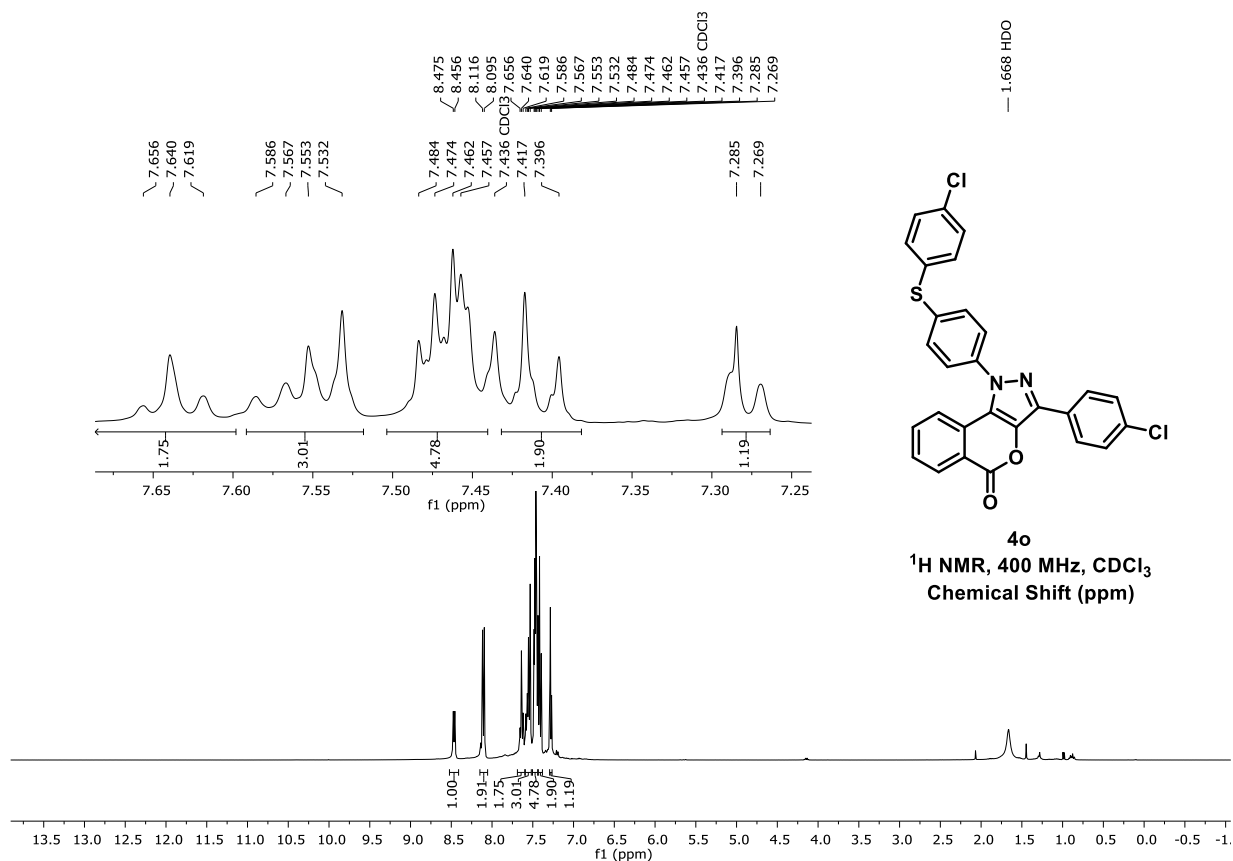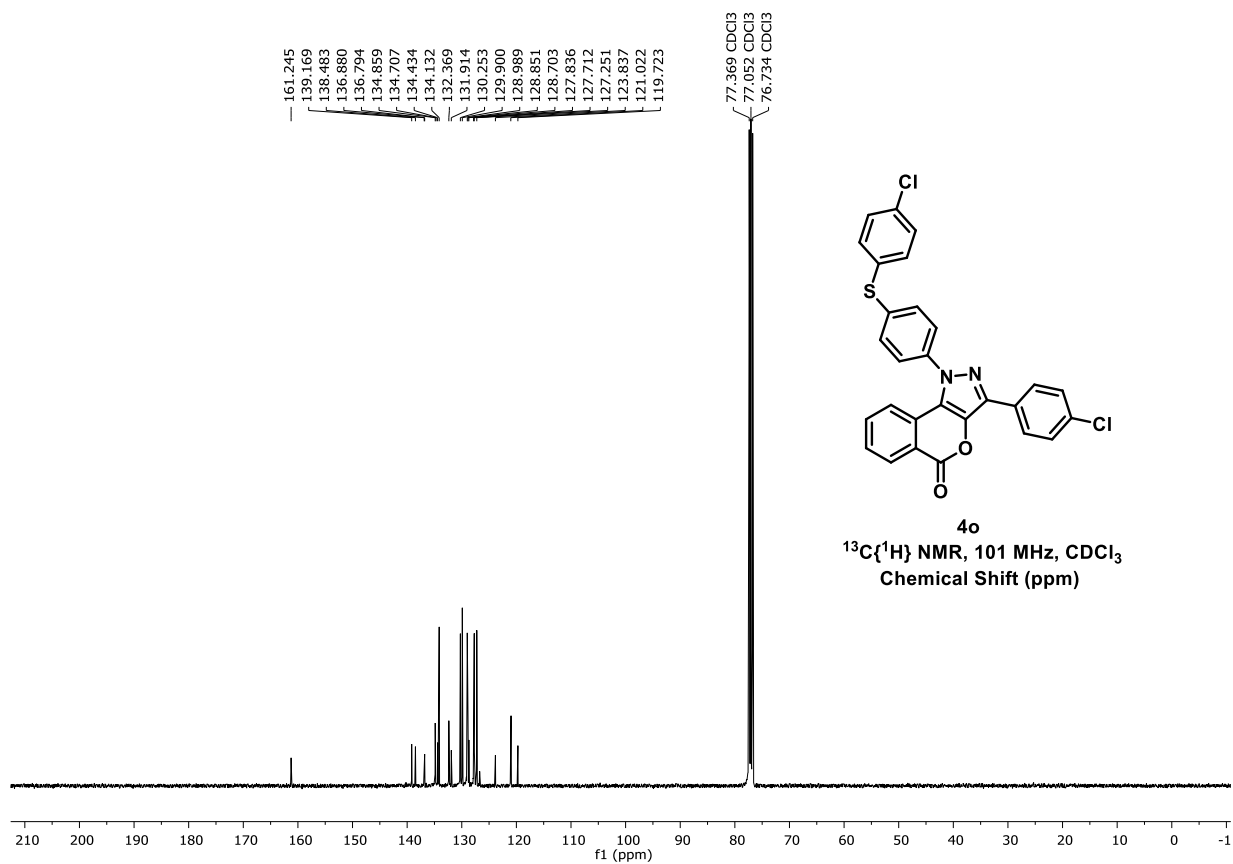

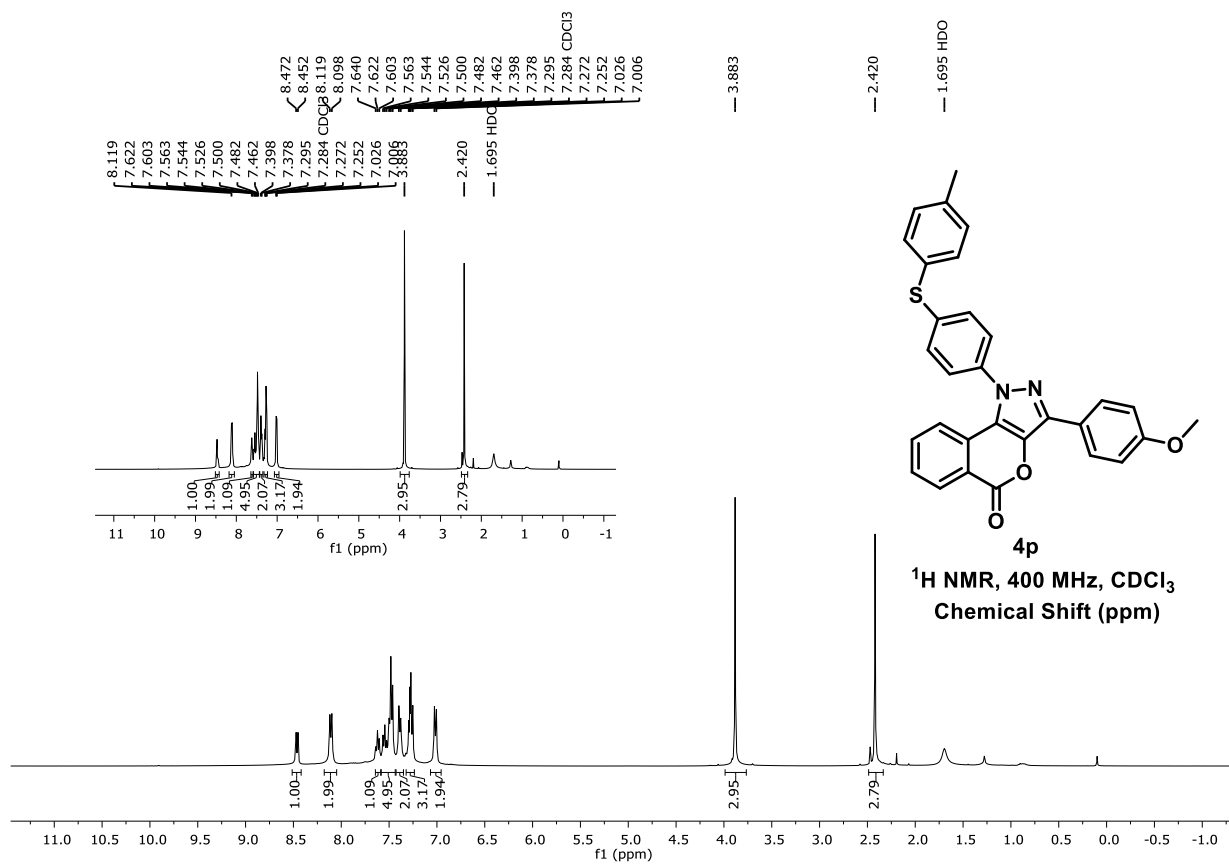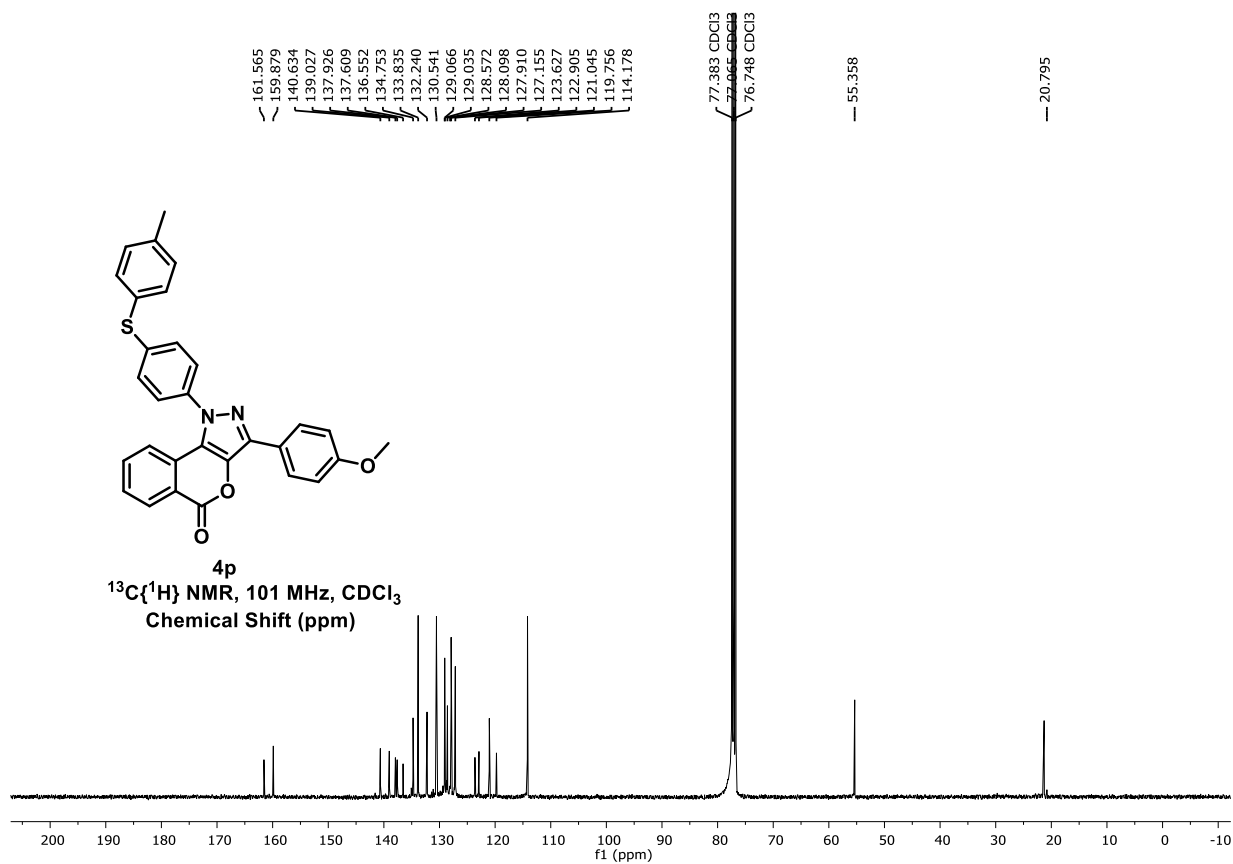

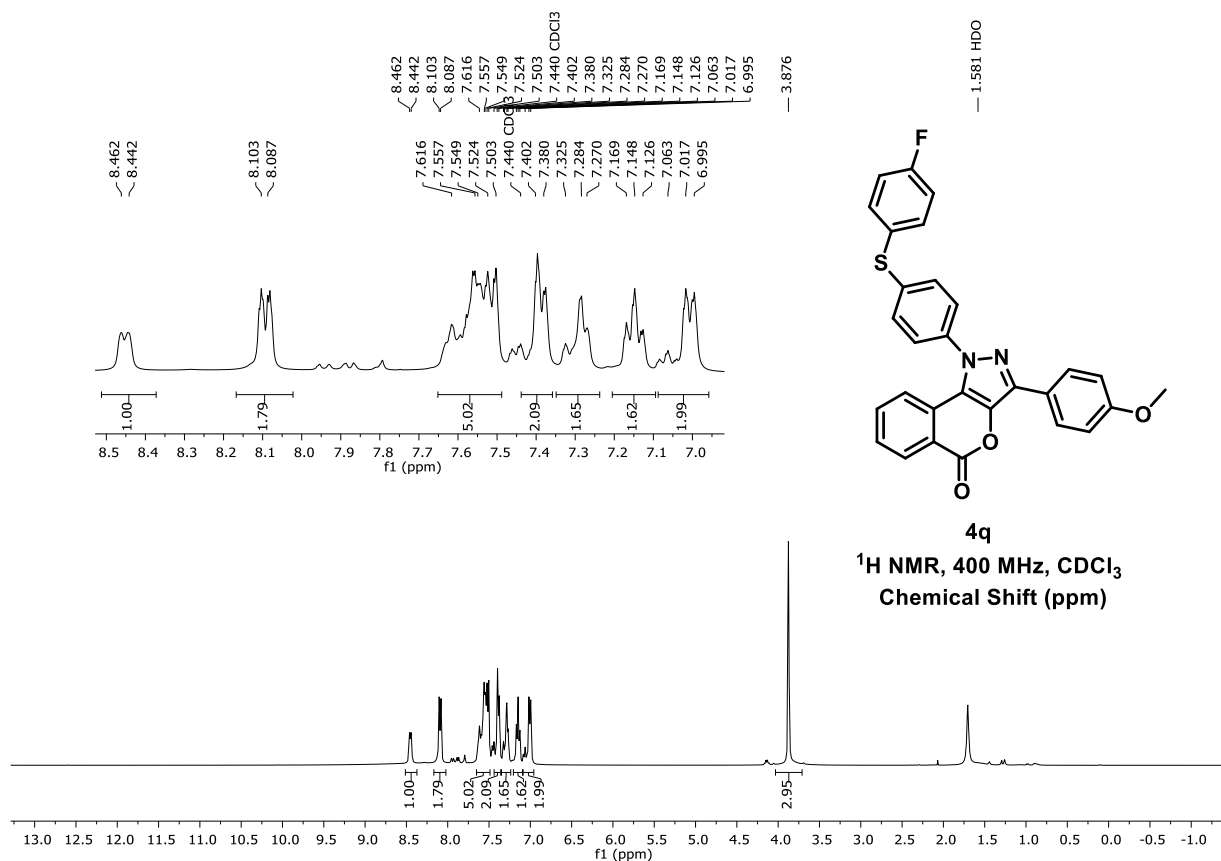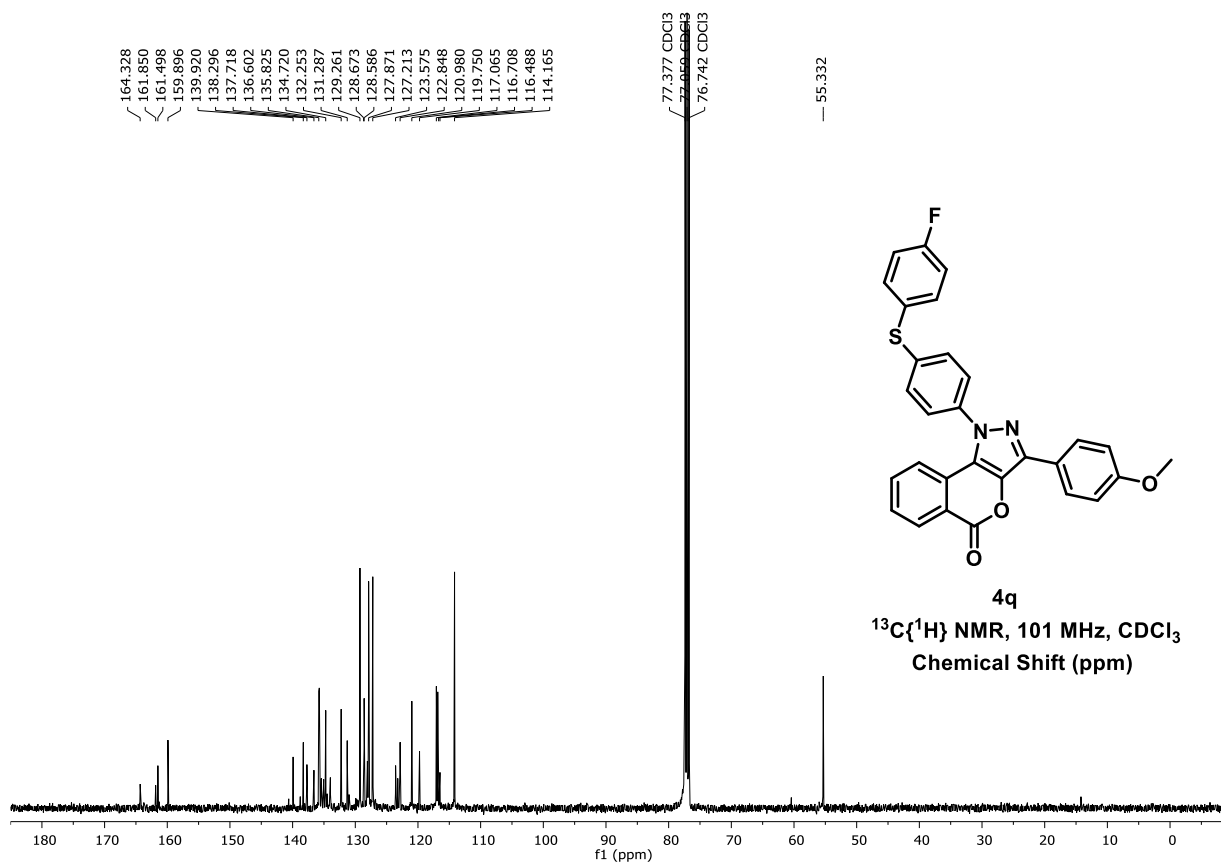

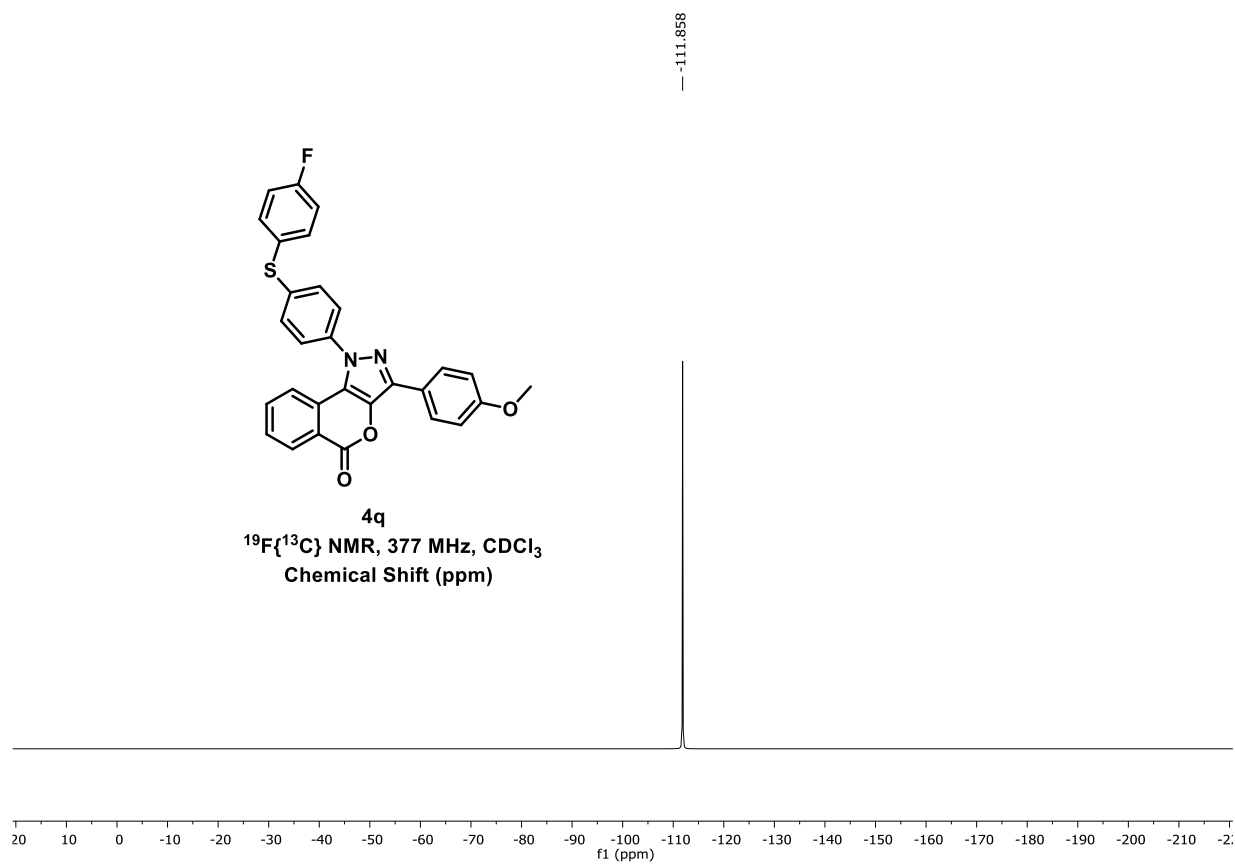



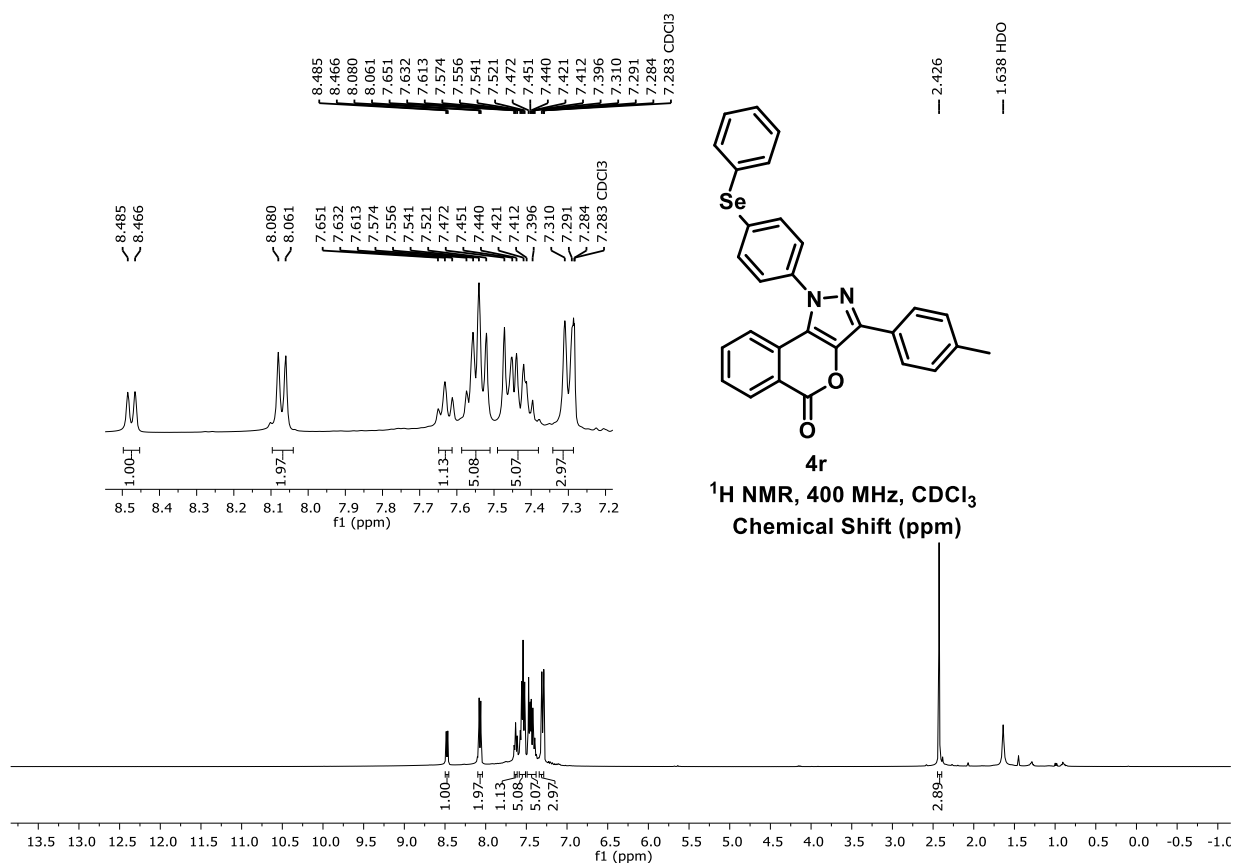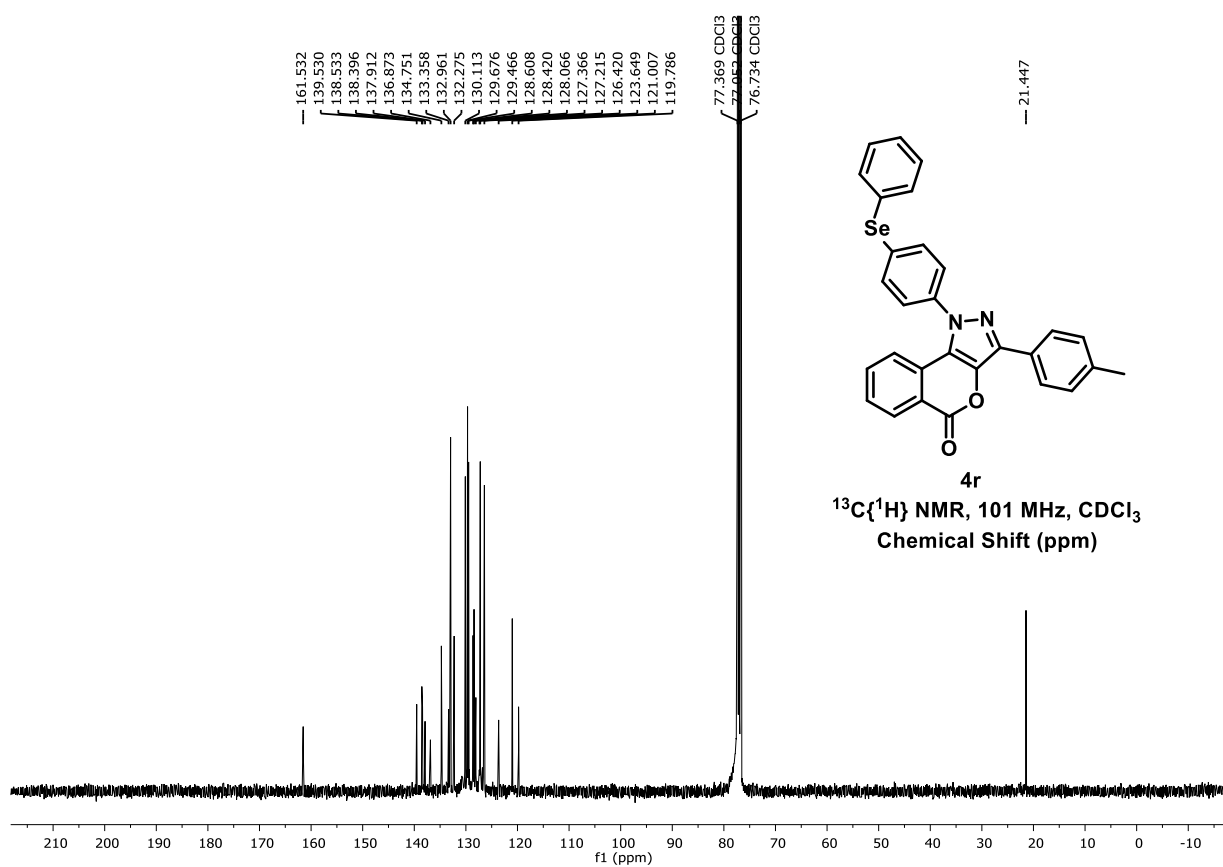

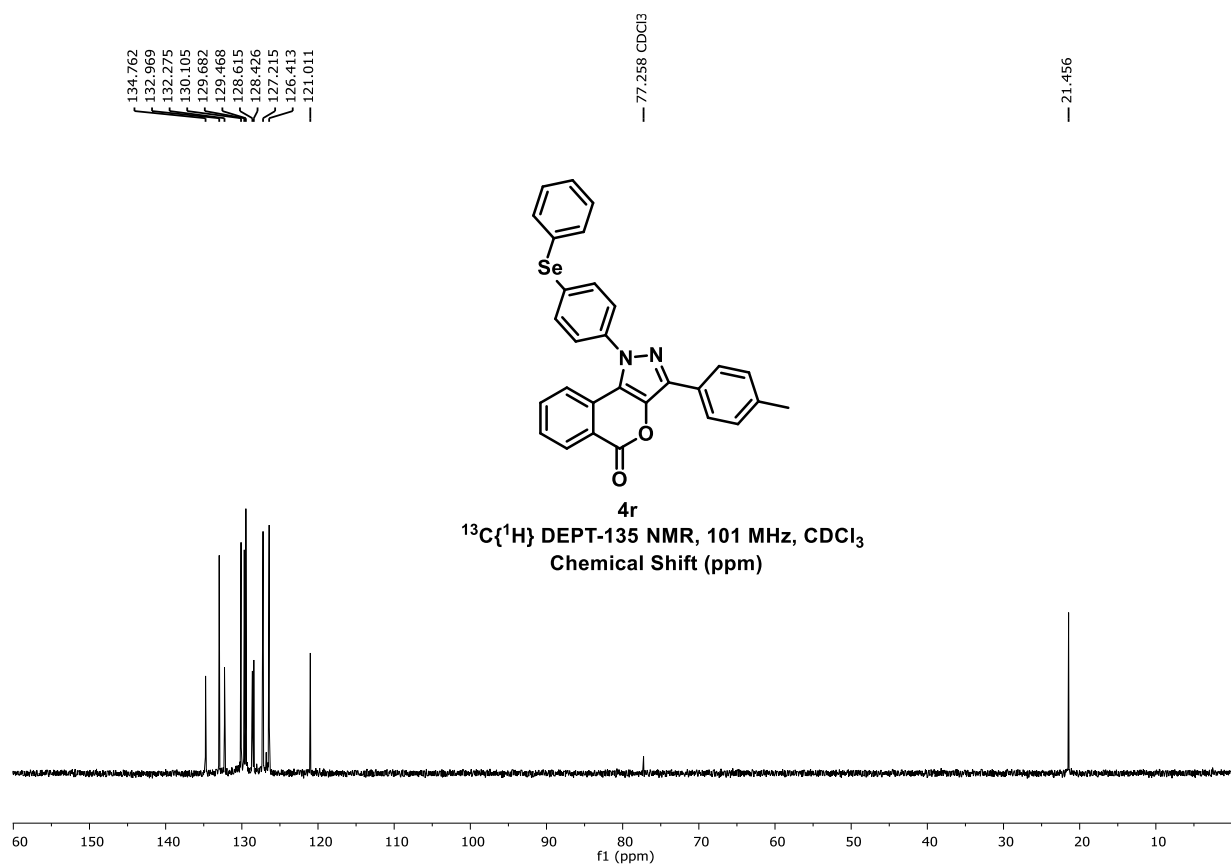

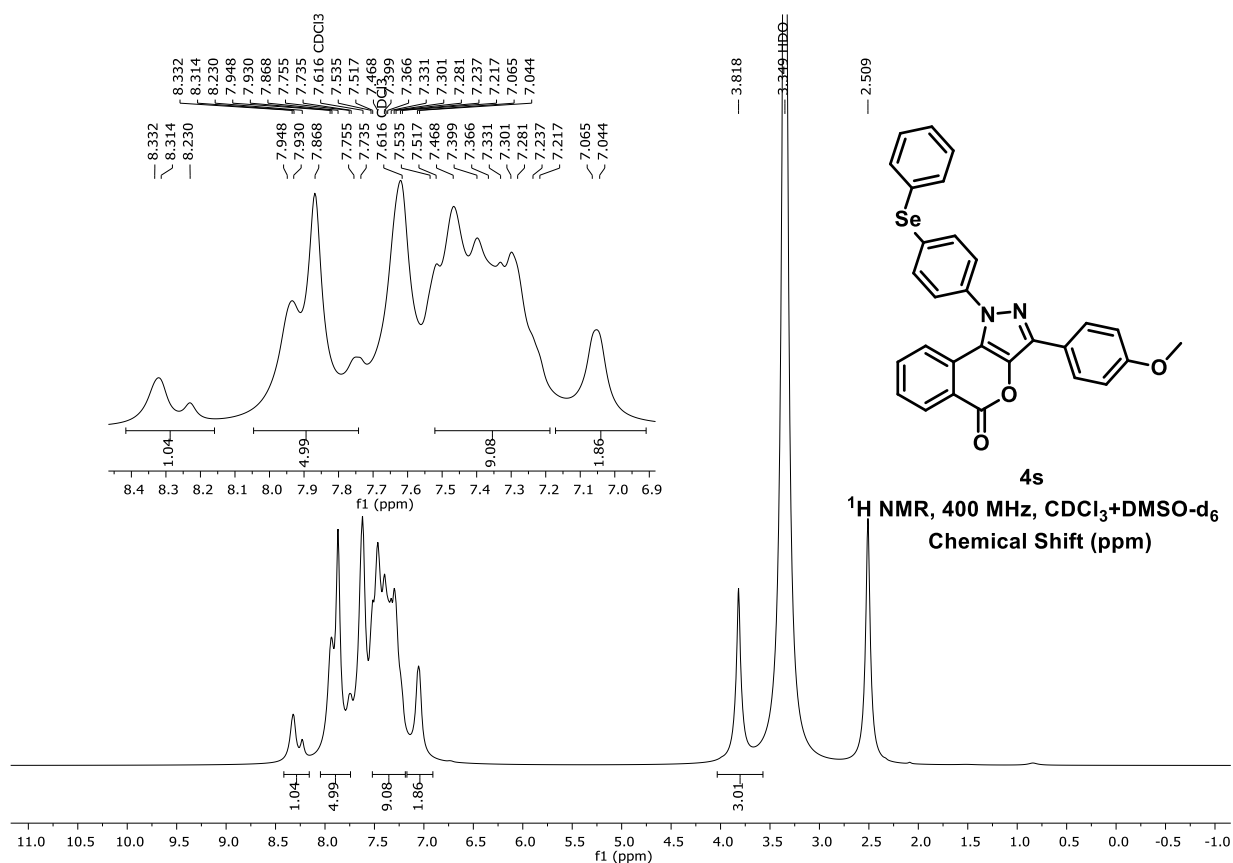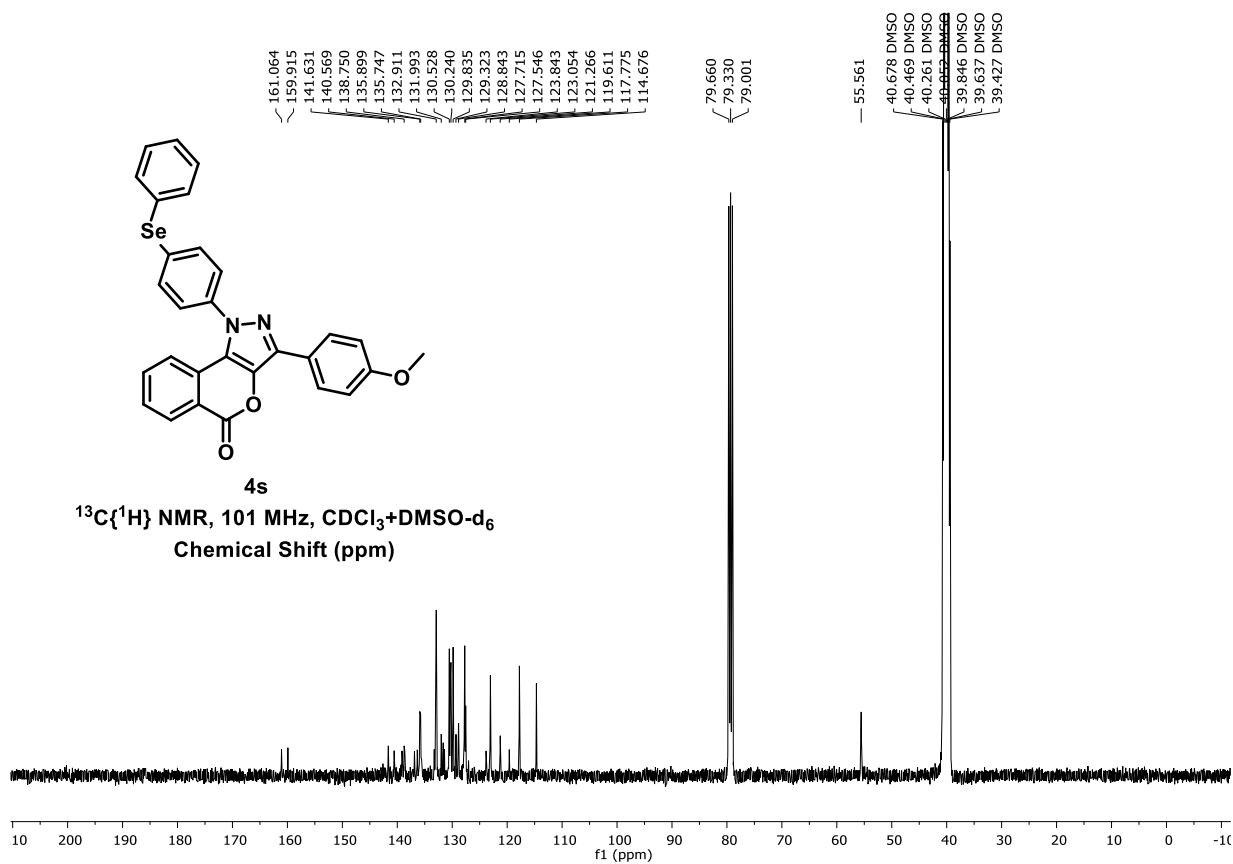

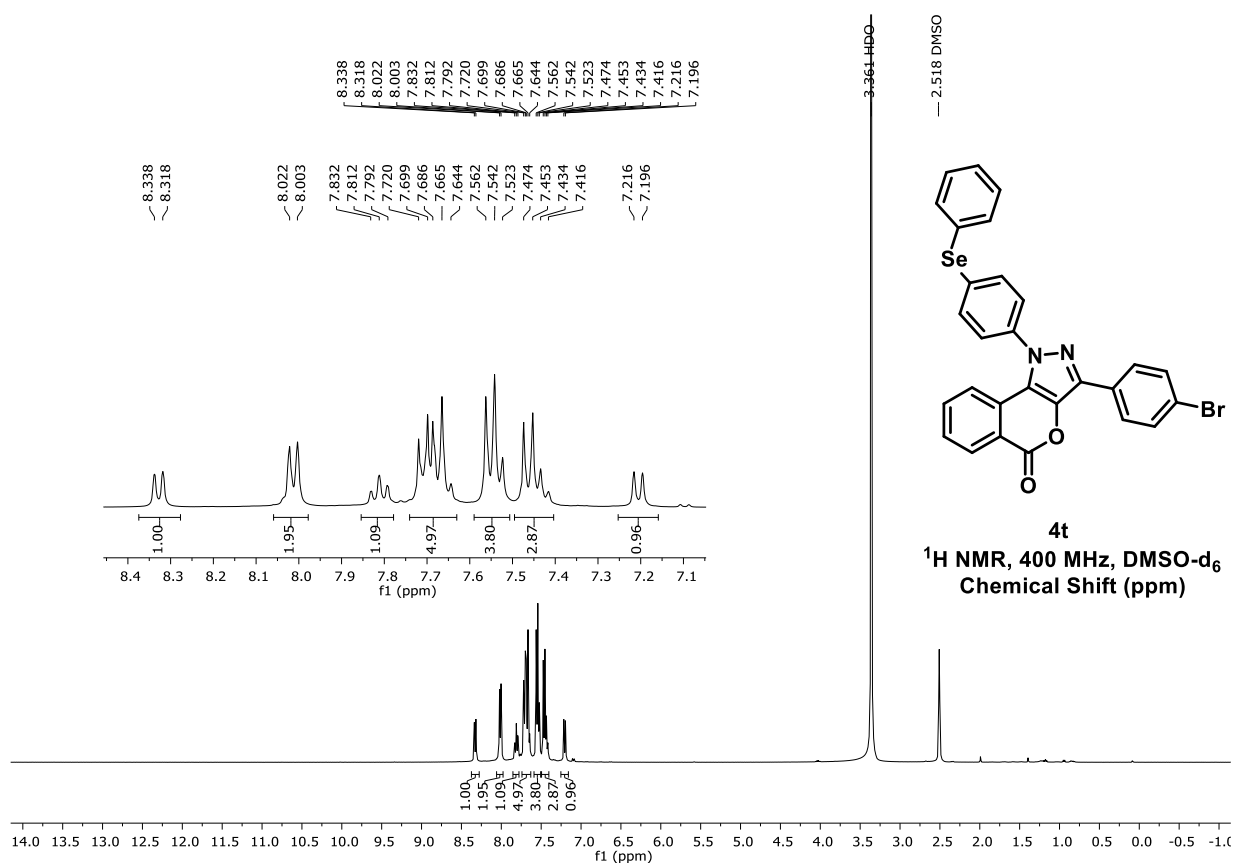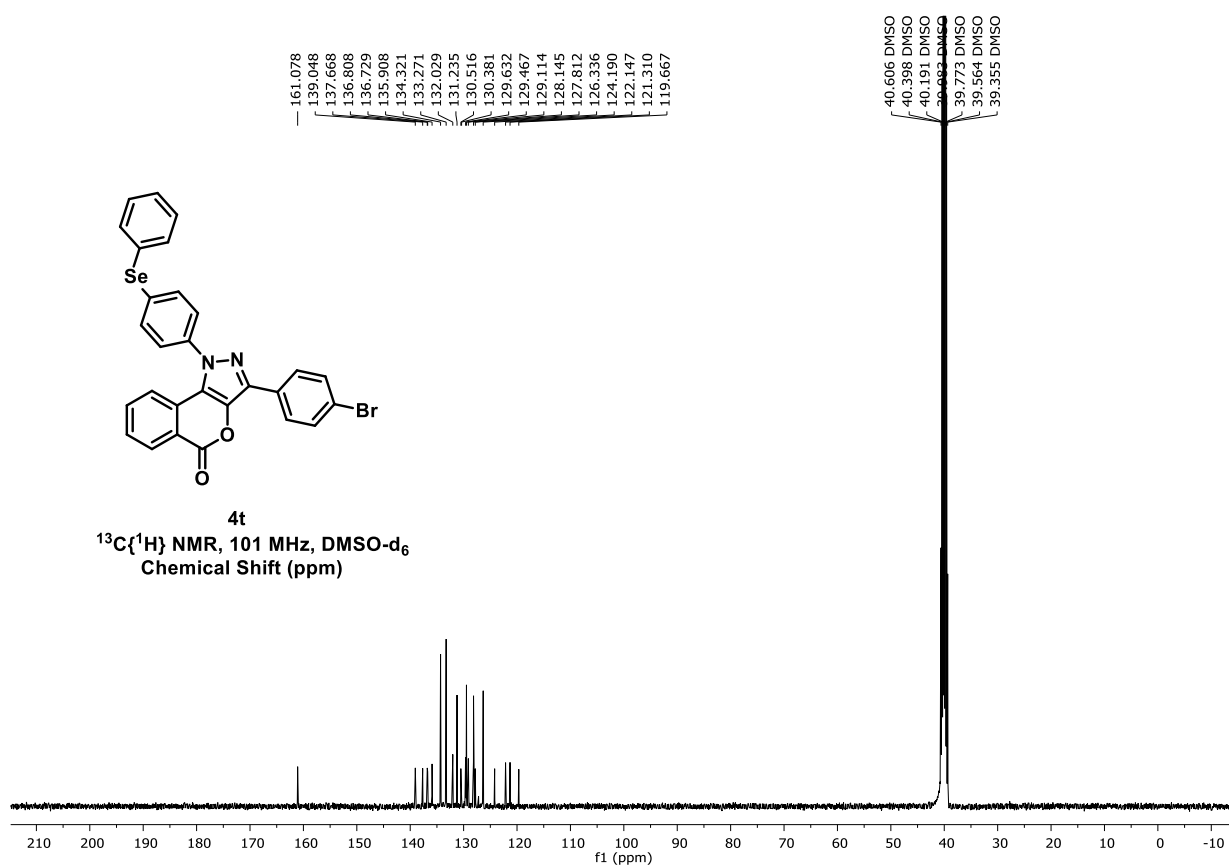

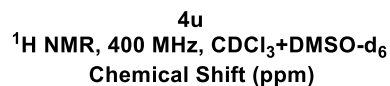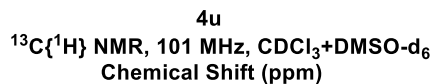

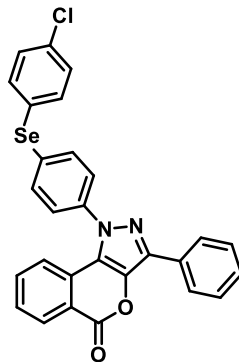

**4v**  
**<sup>1</sup>H NMR, 400 MHz, CDCl<sub>3</sub>**  
**Chemical Shift (ppm)**

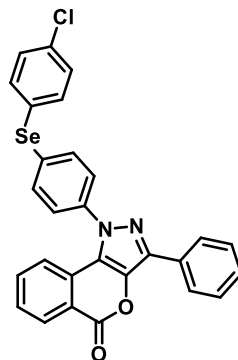

**4v**  
 **$^{13}\text{C}\{^1\text{H}\}$  NMR, 101 MHz,  $\text{CDCl}_3$**   
**Chemical Shift (ppm)**

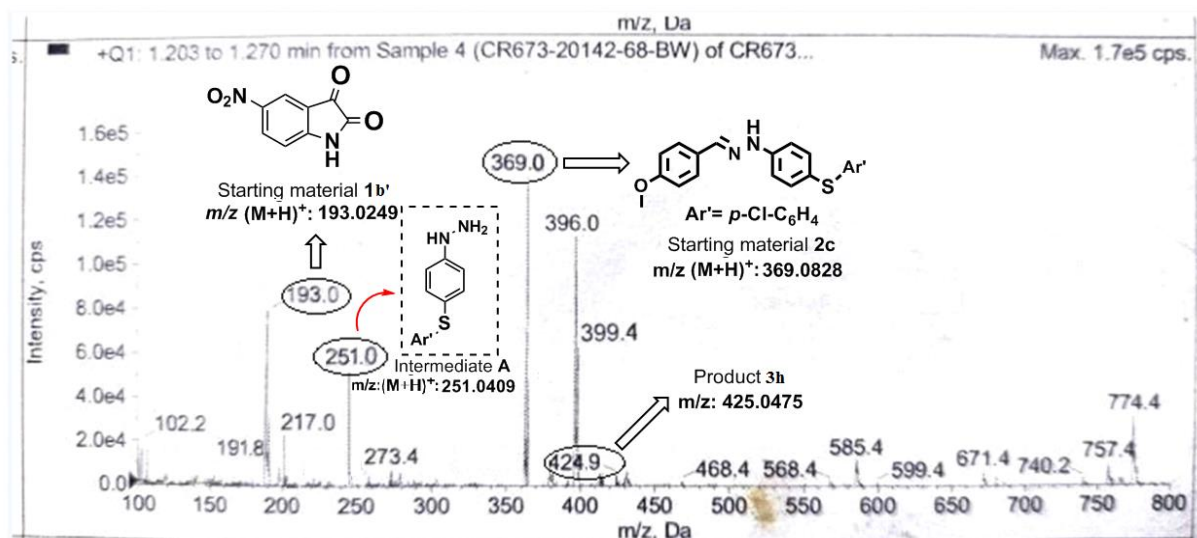

**Figure S3.** LC-MS Mass Spectrum of reaction mixture (**1b'**+**2c**) after 5 min.
